# Supplementary material
Source: PubMed Central journal article supplement (PMC4438329)
Supplement: ismej2014227x6.pdf [file ismej2014227x6.pdf]

| COG     | Function                                                                                                          | Functional Category                                            |
|---------|-------------------------------------------------------------------------------------------------------------------|----------------------------------------------------------------|
| COG1828 | Phosphoribosylformylglycinamide (FGAM) synthase, PurS component                                                   | F Nucleotide transport and metabolism                          |
| COG3194 | Ureidoglycolate hydrolase                                                                                         | F Nucleotide transport and metabolism                          |
| COG5515 | Uncharacterized conserved small protein                                                                           | S Function unknown                                             |
| COG1489 | DNA-binding protein, stimulates sugar fermentation                                                                | R General function prediction only                             |
| COG1058 | Predicted nucleotide-utilizing enzyme related to molybdopterin-biosynthesis enzyme MoeA                           | R General function prediction only                             |
| COG0006 | Xaa-Pro aminopeptidase                                                                                            | E Amino acid transport and metabolism                          |
| COG0277 | FAD/FMN-containing dehydrogenases                                                                                 | C Energy production and conversion                             |
| COG2192 | Predicted carbamoyl transferase, NodU family                                                                      | O Posttranslational modification, protein turnover, chaperones |
| COG0418 | Dihydroorotase                                                                                                    | F Nucleotide transport and metabolism                          |
| COG1570 | Exonuclease VII, large subunit                                                                                    | L Replication, recombination and repair                        |
| COG0435 | Predicted glutathione S-transferase                                                                               | O Posttranslational modification, protein turnover, chaperones |
| COG0717 | Deoxycytidine deaminase                                                                                           | F Nucleotide transport and metabolism                          |
| COG0777 | Acetyl-CoA carboxylase beta subunit                                                                               | I Lipid transport and metabolism                               |
| COG1984 | Allophanate hydrolase subunit 2                                                                                   | E Amino acid transport and metabolism                          |
| COG2049 | Allophanate hydrolase subunit 1                                                                                   | E Amino acid transport and metabolism                          |
| COG1540 | Uncharacterized proteins, homologs of lactam utilization protein B                                                | R General function prediction only                             |
| COG4336 | Uncharacterized conserved protein                                                                                 | S Function unknown                                             |
| COG0159 | Tryptophan synthase alpha chain                                                                                   | E Amino acid transport and metabolism                          |
| COG0665 | Glycine/D-amino acid oxidases (deaminating)                                                                       | E Amino acid transport and metabolism                          |
| COG0280 | Phosphotransacetylase                                                                                             | C Energy production and conversion                             |
| COG0133 | Tryptophan synthase beta chain                                                                                    | E Amino acid transport and metabolism                          |
| COG2055 | Malate/L-lactate dehydrogenases                                                                                   | C Energy production and conversion                             |
| COG1593 | TRAP-type C4-dicarboxylate transport system, large permease component                                             | G Carbohydrate transport and metabolism                        |
| COG1937 | Uncharacterized protein conserved in bacteria                                                                     | S Function unknown                                             |
| COG3181 | Uncharacterized protein conserved in bacteria                                                                     | S Function unknown                                             |
| COG1233 | Phytoene dehydrogenase and related proteins                                                                       | Q Secondary metabolites biosynthesis, transport and catabolism |
| COG2814 | Arabinose efflux permease                                                                                         | G Carbohydrate transport and metabolism                        |
| COG1022 | Long-chain acyl-CoA synthetases (AMP-forming)                                                                     | I Lipid transport and metabolism                               |
| COG0518 | GMP synthase - Glutamine amidotransferase domain                                                                  | F Nucleotide transport and metabolism                          |
| COG2252 | Permeases                                                                                                         | R General function prediction only                             |
| COG0438 | Glycosyltransferase                                                                                               | M Cell wall/membrane/envelope biogenesis                       |
| COG0300 | Short-chain dehydrogenases of various substrate specificities                                                     | R General function prediction only                             |
| COG0764 | 3-hydroxymyristoyl/3-hydroxydecanoyl-(acyl carrier protein) dehydratases                                          | I Lipid transport and metabolism                               |
| COG0304 | 3-oxoacyl-(acyl-carrier-protein) synthase                                                                         | I Lipid transport and metabolism                               |
| COG0526 | Thiol-disulfide isomerase and thioredoxins                                                                        | O Posttranslational modification, protein turnover, chaperones |
| COG5508 | Uncharacterized conserved small protein                                                                           | S Function unknown                                             |
| COG0747 | ABC-type dipeptide transport system, periplasmic component                                                        | E Amino acid transport and metabolism                          |
| COG0601 | ABC-type dipeptide/oligopeptide/nickel transport systems, permease components                                     | E Amino acid transport and metabolism                          |
| COG1173 | ABC-type dipeptide/oligopeptide/nickel transport systems, permease components                                     | E Amino acid transport and metabolism                          |
| COG4948 | L-alanine-DL-glutamate epimerase and related enzymes of enolase superfamily                                       | M Cell wall/membrane/envelope biogenesis                       |
| COG0520 | Selenocysteine lyase                                                                                              | E Amino acid transport and metabolism                          |
| COG2133 | Glucose/sorbose dehydrogenases                                                                                    | G Carbohydrate transport and metabolism                        |
| COG3221 | ABC-type phosphate/phosphonate transport system, periplasmic component                                            | P Inorganic ion transport and metabolism                       |
| COG1899 | Deoxyhypusine synthase                                                                                            | O Posttranslational modification, protein turnover, chaperones |
| COG1680 | Beta-lactamase class C and other penicillin binding proteins                                                      | V Defense mechanisms                                           |
| COG1073 | Hydrolases of the alpha/beta superfamily                                                                          | R General function prediction only                             |
| COG3802 | Uncharacterized protein conserved in bacteria                                                                     | S Function unknown                                             |
| COG3491 | Isopenicillin N synthase and related dioxygenases                                                                 | R General function prediction only                             |
| COG1086 | Predicted nucleoside-diphosphate sugar epimerases                                                                 | M Cell wall/membrane/envelope biogenesis                       |
| COG2089 | Sialic acid synthase                                                                                              | M Cell wall/membrane/envelope biogenesis                       |
| COG0612 | Predicted Zn-dependent peptidases                                                                                 | R General function prediction only                             |
| COG0461 | Orotate phosphoribosyltransferase                                                                                 | F Nucleotide transport and metabolism                          |
| COG3178 | Predicted phosphotransferase related to Ser/Thr protein kinases                                                   | R General function prediction only                             |
| COG0251 | Putative translation initiation inhibitor, yjgF family                                                            | J Translation, ribosomal structure and biogenesis              |
| COG1208 | Nucleoside-diphosphate-sugar pyrophosphorylase involved in lipopolysaccharide biosynthesis/translation initiation | M Cell wall/membrane/envelope biogenesis                       |
| COG2127 | Uncharacterized conserved protein                                                                                 | S Function unknown                                             |
| COG3484 | Predicted proteasome-type protease                                                                                | O Posttranslational modification, protein turnover, chaperones |
| COG0739 | Membrane proteins related to metalloendopeptidases                                                                | M Cell wall/membrane/envelope biogenesis                       |
| COG1686 | D-alanyl-D-alanine carboxypeptidase                                                                               | M Cell wall/membrane/envelope biogenesis                       |
| COG2998 | ABC-type tungstate transport system, permease component                                                           | H Coenzyme transport and metabolism                            |
| COG4662 | ABC-type tungstate transport system, periplasmic component                                                        | H Coenzyme transport and metabolism                            |
| COG1526 | Uncharacterized protein required for formate dehydrogenase activity                                               | C Energy production and conversion                             |
| COG0746 | Molybdopterin-guanine dinucleotide biosynthesis protein A                                                         | H Coenzyme transport and metabolism                            |
| COG0397 | Uncharacterized conserved protein                                                                                 | S Function unknown                                             |
| COG0580 | Glycerol uptake facilitator and related permeases (Major Intrinsic Protein Family)                                | G Carbohydrate transport and metabolism                        |
| COG0235 | Ribulose-5-phosphate 4-epimerase and related epimerases and aldolases                                             | G Carbohydrate transport and metabolism                        |
| COG0711 | FOF1-type ATP synthase, subunit b                                                                                 | C Energy production and conversion                             |
| COG0711 | FOF1-type ATP synthase, subunit b                                                                                 | C Energy production and conversion                             |
| COG5336 | Uncharacterized protein conserved in bacteria                                                                     | S Function unknown                                             |
| COG0667 | Predicted oxidoreductases (related to aryl-alcohol dehydrogenases)                                                | C Energy production and conversion                             |
| COG4338 | Uncharacterized protein conserved in bacteria                                                                     | S Function unknown                                             |
| COG4948 | L-alanine-DL-glutamate epimerase and related enzymes of enolase superfamily                                       | M Cell wall/membrane/envelope biogenesis                       |
| COG2154 | Pterin-4a-carbinolamine dehydratase                                                                               | H Coenzyme transport and metabolism                            |
| COG0366 | Glycosidases                                                                                                      | G Carbohydrate transport and metabolism                        |
| COG2225 | Malate synthase                                                                                                   | C Energy production and conversion                             |
| COG0270 | Site-specific DNA methylase                                                                                       | L Replication, recombination and repair                        |
| COG4783 | Putative Zn-dependent protease, contains TPR repeats                                                              | R General function prediction only                             |
| COG2025 | Electron transfer flavoprotein, alpha subunit                                                                     | C Energy production and conversion                             |
| COG0583 | Transcriptional regulator                                                                                         | K Transcription                                                |
| COG3288 | NAD/NADP transhydrogenase alpha subunit                                                                           | C Energy production and conversion                             |
| COG1182 | Acyl carrier protein phosphodiesterase                                                                            | I Lipid transport and metabolism                               |
| COG0399 | Predicted pyridoxal phosphate-dependent enzyme apparently involved in regulation of cell wall biogenesis          | M Cell wall/membrane/envelope biogenesis                       |
| COG0006 | Xaa-Pro aminopeptidase                                                                                            | E Amino acid transport and metabolism                          |
| COG2040 | Homocysteine/selenocysteine methylase (S-methylmethionine-dependent)                                              | E Amino acid transport and metabolism                          |
| COG2721 | Altronate dehydratase                                                                                             | G Carbohydrate transport and metabolism                        |

|         |                                                                                                                          |   |                                                               |
|---------|--------------------------------------------------------------------------------------------------------------------------|---|---------------------------------------------------------------|
| COG3386 | Gluconolactonase                                                                                                         | G | Carbohydrate transport and metabolism                         |
| COG1475 | Predicted transcriptional regulators                                                                                     | K | Transcription                                                 |
| COG1840 | ABC-type Fe <sup>3+</sup> transport system, periplasmic component                                                        | P | Inorganic ion transport and metabolism                        |
| COG0816 | Predicted endonuclease involved in recombination (possible Holliday junction resolvase in Mycoplasmas and B. sub         | L | Replication, recombination and repair                         |
| COG0558 | Phosphatidylglycerophosphate synthase                                                                                    | I | Lipid transport and metabolism                                |
| COG0839 | NADH:ubiquinone oxidoreductase subunit 6 (chain J)                                                                       | C | Energy production and conversion                              |
| COG1009 | NADH:ubiquinone oxidoreductase subunit 5 (chain L)/Multisubunit Na <sup>+</sup> /H <sup>+</sup> antiporter, MnhA subunit | C | Energy production and conversion                              |
| COG0343 | Queuine/archaeosine tRNA-ribosyltransferase                                                                              | J | Translation, ribosomal structure and biogenesis               |
| COG0101 | Pseudouridylylase synthase                                                                                               | J | Translation, ribosomal structure and biogenesis               |
| COG0150 | Phosphoribosylaminoimidazole (AIR) synthetase                                                                            | F | Nucleotide transport and metabolism                           |
| COG1006 | Multisubunit Na <sup>+</sup> /H <sup>+</sup> antiporter, MnhC subunit                                                    | P | Inorganic ion transport and metabolism                        |
| COG2111 | Multisubunit Na <sup>+</sup> /H <sup>+</sup> antiporter, MnhB subunit                                                    | P | Inorganic ion transport and metabolism                        |
| COG1320 | Multisubunit Na <sup>+</sup> /H <sup>+</sup> antiporter, MnhG subunit                                                    | P | Inorganic ion transport and metabolism                        |
| COG1385 | Uncharacterized protein conserved in bacteria                                                                            | S | Function unknown                                              |
| COG0196 | FAD synthase                                                                                                             | H | Coenzyme transport and metabolism                             |
| COG0623 | Enoyl-[acyl-carrier-protein] reductase (NADH)                                                                            | I | Lipid transport and metabolism                                |
| COG2104 | Sulfur transfer protein involved in thiamine biosynthesis                                                                | H | Coenzyme transport and metabolism                             |
| COG0663 | Carbonic anhydrases/acyltransferases, isoleucine patch superfamily                                                       | R | General function prediction only                              |
| COG0018 | Arginyl-tRNA synthetase                                                                                                  | J | Translation, ribosomal structure and biogenesis               |
| COG0670 | Integral membrane protein, interacts with FtsH                                                                           | R | General function prediction only                              |
| COG1005 | NADH:ubiquinone oxidoreductase subunit 1 (chain H)                                                                       | C | Energy production and conversion                              |
| COG2823 | Predicted periplasmic or secreted lipoprotein                                                                            | R | General function prediction only                              |
| COG0184 | Ribosomal protein S15P/S13E                                                                                              | J | Translation, ribosomal structure and biogenesis               |
| COG0015 | Adenylosuccinate lyase                                                                                                   | F | Nucleotide transport and metabolism                           |
| COG0359 | Ribosomal protein L9                                                                                                     | J | Translation, ribosomal structure and biogenesis               |
| COG0360 | Ribosomal protein S6                                                                                                     | J | Translation, ribosomal structure and biogenesis               |
| COG0226 | ABC-type phosphate transport system, periplasmic component                                                               | P | Inorganic ion transport and metabolism                        |
| COG0697 | Permeases of the drug/metabolite transporter (DMT) superfamily                                                           | G | Carbohydrate transport and metabolism                         |
| COG0590 | Cytosine/adenosine deaminases                                                                                            | F | Nucleotide transport and metabolism                           |
| COG0223 | Methionyl-tRNA formyltransferase                                                                                         | J | Translation, ribosomal structure and biogenesis               |
| COG0130 | Pseudouridine synthase                                                                                                   | J | Translation, ribosomal structure and biogenesis               |
| COG1530 | Ribonucleases G and E                                                                                                    | J | Translation, ribosomal structure and biogenesis               |
| COG0157 | Nicotinate-nucleotide pyrophosphorylase                                                                                  | H | Coenzyme transport and metabolism                             |
| COG0228 | Ribosomal protein S16                                                                                                    | J | Translation, ribosomal structure and biogenesis               |
| COG0806 | RimM protein, required for 16S rRNA processing                                                                           | J | Translation, ribosomal structure and biogenesis               |
| COG0805 | Sec-independent protein secretion pathway component TatC                                                                 | U | Intracellular trafficking, secretion, and vesicular transport |
| COG2890 | Methylation of polypeptide chain release factors                                                                         | J | Translation, ribosomal structure and biogenesis               |
| COG0712 | FOF1-type ATP synthase, delta subunit (mitochondrial oligomycin sensitivity protein)                                     | C | Energy production and conversion                              |
| COG0212 | 5-formyltetrahydrofolate cyclo-ligase                                                                                    | H | Coenzyme transport and metabolism                             |
| COG4591 | ABC-type transport system, involved in lipoprotein release, permease component                                           | M | Cell wall/membrane/envelope biogenesis                        |
| COG1830 | DhnA-type fructose-1,6-bisphosphate aldolase and related enzymes                                                         | G | Carbohydrate transport and metabolism                         |
| COG4974 | Site-specific recombinase XerD                                                                                           | L | Replication, recombination and repair                         |
| COG0564 | Pseudouridylylase synthases, 23S RNA-specific                                                                            | J | Translation, ribosomal structure and biogenesis               |
| COG0845 | Membrane-fusion protein                                                                                                  | M | Cell wall/membrane/envelope biogenesis                        |
| COG0044 | Dihydroorotase and related cyclic amidohydrolases                                                                        | F | Nucleotide transport and metabolism                           |
| COG1734 | DnaK suppressor protein                                                                                                  | T | Signal transduction mechanisms                                |
| COG1351 | Predicted alternative thymidylate synthase                                                                               | F | Nucleotide transport and metabolism                           |
| COG0330 | Membrane protease subunits, stomatin/prohibitin homologs                                                                 | O | Posttranslational modification, protein turnover, chaperones  |
| COG0330 | Membrane protease subunits, stomatin/prohibitin homologs                                                                 | O | Posttranslational modification, protein turnover, chaperones  |
| COG0265 | Trypsin-like serine proteases, typically periplasmic, contain C-terminal PDZ domain                                      | O | Posttranslational modification, protein turnover, chaperones  |
| COG0592 | DNA polymerase sliding clamp subunit (PCNA homolog)                                                                      | L | Replication, recombination and repair                         |
| COG0612 | Predicted Zn-dependent peptidases                                                                                        | R | General function prediction only                              |
| COG5405 | ATP-dependent protease HslVU (ClpYQ), peptidase subunit                                                                  | O | Posttranslational modification, protein turnover, chaperones  |
| COG0167 | Dihydroorotate dehydrogenase                                                                                             | F | Nucleotide transport and metabolism                           |
| COG0128 | 5-enolpyruvylshikimate-3-phosphate synthase                                                                              | E | Amino acid transport and metabolism                           |
| COG0138 | AICAR transformylase/IMP cyclohydrolase PurH (only IMP cyclohydrolase domain in AfuI)                                    | F | Nucleotide transport and metabolism                           |
| COG0189 | Glutathione synthase/Ribosomal protein S6 modification enzyme (glutaminyl transferase)                                   | H | Coenzyme transport and metabolism                             |
| COG0593 | ATPase involved in DNA replication initiation                                                                            | L | Replication, recombination and repair                         |
| COG0841 | Cation/multidrug efflux pump                                                                                             | V | Defense mechanisms                                            |
| COG0231 | Translation elongation factor P (EF-P)/translation initiation factor 5A (eIF-5A)                                         | J | Translation, ribosomal structure and biogenesis               |
| COG1195 | Recombinational DNA repair ATPase (RecF pathway)                                                                         | L | Replication, recombination and repair                         |
| COG0742 | N6-adenine-specific methylase                                                                                            | L | Replication, recombination and repair                         |
| COG0271 | Stress-induced morphogen (activity unknown)                                                                              | T | Signal transduction mechanisms                                |
| COG0278 | Glutaredoxin-related protein                                                                                             | O | Posttranslational modification, protein turnover, chaperones  |
| COG1198 | Primosomal protein N <sup>1</sup> (replication factor Y) - superfamily II helicase                                       | L | Replication, recombination and repair                         |
| COG0576 | Molecular chaperone GrpE (heat shock protein)                                                                            | O | Posttranslational modification, protein turnover, chaperones  |
| COG0180 | Tryptophanyl-tRNA synthetase                                                                                             | J | Translation, ribosomal structure and biogenesis               |
| COG0291 | Ribosomal protein L35                                                                                                    | J | Translation, ribosomal structure and biogenesis               |
| COG0292 | Ribosomal protein L20                                                                                                    | J | Translation, ribosomal structure and biogenesis               |
| COG0016 | Phenylalanyl-tRNA synthetase alpha subunit                                                                               | J | Translation, ribosomal structure and biogenesis               |
| COG0698 | Ribose 5-phosphate isomerase RpiB                                                                                        | G | Carbohydrate transport and metabolism                         |
| COG0352 | Thiamine monophosphate synthase                                                                                          | H | Coenzyme transport and metabolism                             |
| COG0458 | Carbamoylphosphate synthase large subunit (split gene in MJ)                                                             | E | Amino acid transport and metabolism                           |
| COG0312 | Predicted Zn-dependent proteases and their inactivated homologs                                                          | R | General function prediction only                              |
| COG0104 | Adenylosuccinate synthase                                                                                                | F | Nucleotide transport and metabolism                           |
| COG0240 | Glycerol-3-phosphate dehydrogenase                                                                                       | C | Energy production and conversion                              |
| COG1396 | Predicted transcriptional regulators                                                                                     | K | Transcription                                                 |
| COG0041 | Phosphoribosylcarboxyaminoimidazole (NCAIR) mutase                                                                       | F | Nucleotide transport and metabolism                           |
| COG0533 | Metal-dependent proteases with possible chaperone activity                                                               | O | Posttranslational modification, protein turnover, chaperones  |
| COG2358 | TRAP-type uncharacterized transport system, periplasmic component                                                        | R | General function prediction only                              |
| COG0142 | Geranylgeranyl pyrophosphate synthase                                                                                    | H | Coenzyme transport and metabolism                             |
| COG0730 | Predicted permeases                                                                                                      | R | General function prediction only                              |
| COG0769 | UDP-N-acetylmuramyl tripeptide synthase                                                                                  | M | Cell wall/membrane/envelope biogenesis                        |
| COG0177 | Predicted EndoIII-related endonuclease                                                                                   | L | Replication, recombination and repair                         |
| COG1183 | Phosphatidylserine synthase                                                                                              | I | Lipid transport and metabolism                                |
| COG0688 | Phosphatidylserine decarboxylase                                                                                         | I | Lipid transport and metabolism                                |

|         |                                                                                     |   |                                                               |
|---------|-------------------------------------------------------------------------------------|---|---------------------------------------------------------------|
| COG0319 | Predicted metal-dependent hydrolase                                                 | R | General function prediction only                              |
| COG0074 | Succinyl-CoA synthetase, alpha subunit                                              | C | Energy production and conversion                              |
| COG0045 | Succinyl-CoA synthetase, beta subunit                                               | C | Energy production and conversion                              |
| COG0611 | Thiamine monophosphate kinase                                                       | H | Coenzyme transport and metabolism                             |
| COG0149 | Triosephosphate isomerase                                                           | G | Carbohydrate transport and metabolism                         |
| COG1054 | Predicted sulfurtransferase                                                         | R | General function prediction only                              |
| COG0154 | Asp-tRNAAsn/Glu-tRNA <sup>Gln</sup> amidotransferase A subunit and related amidases | J | Translation, ribosomal structure and biogenesis               |
| COG3175 | Cytochrome oxidase assembly factor                                                  | O | Posttranslational modification, protein turnover, chaperones  |
| COG0593 | ATPase involved in DNA replication initiation                                       | L | Replication, recombination and repair                         |
| COG0136 | Aspartate-semialdehyde dehydrogenase                                                | E | Amino acid transport and metabolism                           |
| COG0566 | rRNA methylases                                                                     | J | Translation, ribosomal structure and biogenesis               |
| COG0087 | Ribosomal protein L3                                                                | J | Translation, ribosomal structure and biogenesis               |
| COG0088 | Ribosomal protein L4                                                                | J | Translation, ribosomal structure and biogenesis               |
| COG0089 | Ribosomal protein L23                                                               | J | Translation, ribosomal structure and biogenesis               |
| COG0090 | Ribosomal protein L2                                                                | J | Translation, ribosomal structure and biogenesis               |
| COG0091 | Ribosomal protein L22                                                               | J | Translation, ribosomal structure and biogenesis               |
| COG0092 | Ribosomal protein S3                                                                | J | Translation, ribosomal structure and biogenesis               |
| COG0197 | Ribosomal protein L16/L10E                                                          | J | Translation, ribosomal structure and biogenesis               |
| COG0186 | Ribosomal protein S17                                                               | J | Translation, ribosomal structure and biogenesis               |
| COG0093 | Ribosomal protein L14                                                               | J | Translation, ribosomal structure and biogenesis               |
| COG0094 | Ribosomal protein L5                                                                | J | Translation, ribosomal structure and biogenesis               |
| COG0199 | Ribosomal protein S14                                                               | J | Translation, ribosomal structure and biogenesis               |
| COG0096 | Ribosomal protein S8                                                                | J | Translation, ribosomal structure and biogenesis               |
| COG0097 | Ribosomal protein L6P/L9E                                                           | J | Translation, ribosomal structure and biogenesis               |
| COG0256 | Ribosomal protein L18                                                               | J | Translation, ribosomal structure and biogenesis               |
| COG0098 | Ribosomal protein S5                                                                | J | Translation, ribosomal structure and biogenesis               |
| COG0200 | Ribosomal protein L15                                                               | J | Translation, ribosomal structure and biogenesis               |
| COG0201 | Preprotein translocase subunit SecY                                                 | U | Intracellular trafficking, secretion, and vesicular transport |
| COG0563 | Adenylate kinase and related kinases                                                | F | Nucleotide transport and metabolism                           |
| COG0099 | Ribosomal protein S13                                                               | J | Translation, ribosomal structure and biogenesis               |
| COG0100 | Ribosomal protein S11                                                               | J | Translation, ribosomal structure and biogenesis               |
| COG0202 | DNA-directed RNA polymerase, alpha subunit/40 kD subunit                            | K | Transcription                                                 |
| COG0203 | Ribosomal protein L17                                                               | J | Translation, ribosomal structure and biogenesis               |
| COG0789 | Predicted transcriptional regulators                                                | K | Transcription                                                 |
| COG1267 | Phosphatidylglycerophosphatase A and related proteins                               | I | Lipid transport and metabolism                                |
| COG0290 | Translation initiation factor 3 (IF-3)                                              | J | Translation, ribosomal structure and biogenesis               |
| COG0633 | Ferredoxin                                                                          | C | Energy production and conversion                              |
| COG0316 | Uncharacterized conserved protein                                                   | S | Function unknown                                              |
| COG1104 | Cysteine sulfinate desulfinate/cysteine desulfurase and related enzymes             | E | Amino acid transport and metabolism                           |
| COG1178 | ABC-type Fe <sup>3+</sup> transport system, permease component                      | P | Inorganic ion transport and metabolism                        |
| COG1825 | Ribosomal protein L25 (general stress protein Ctc)                                  | J | Translation, ribosomal structure and biogenesis               |
| COG0193 | Peptidyl-tRNA hydrolase                                                             | J | Translation, ribosomal structure and biogenesis               |
| COG0237 | Dephospho-CoA kinase                                                                | H | Coenzyme transport and metabolism                             |
| COG0061 | Predicted sugar kinase                                                              | G | Carbohydrate transport and metabolism                         |
| COG0568 | DNA-directed RNA polymerase, sigma subunit (sigma70/sigma32)                        | K | Transcription                                                 |
| COG1136 | ABC-type antimicrobial peptide transport system, ATPase component                   | V | Defense mechanisms                                            |
| COG0354 | Predicted aminomethyltransferase related to GcvT                                    | R | General function prediction only                              |
| COG0854 | Pyridoxal phosphate biosynthesis protein                                            | H | Coenzyme transport and metabolism                             |
| COG0227 | Ribosomal protein L28                                                               | J | Translation, ribosomal structure and biogenesis               |
| COG0320 | Lipoate synthase                                                                    | H | Coenzyme transport and metabolism                             |
| COG2867 | Oligoketide cyclase/lipid transport protein                                         | I | Lipid transport and metabolism                                |
| COG1806 | Uncharacterized protein conserved in bacteria                                       | S | Function unknown                                              |
| COG1253 | Hemolysins and related proteins containing CBS domains                              | R | General function prediction only                              |
| COG1146 | Ferredoxin                                                                          | C | Energy production and conversion                              |
| COG0215 | CysteinyI-tRNA synthetase                                                           | J | Translation, ribosomal structure and biogenesis               |
| COG0036 | Pentose-5-phosphate-3-epimerase                                                     | G | Carbohydrate transport and metabolism                         |
| COG0024 | Methionine aminopeptidase                                                           | J | Translation, ribosomal structure and biogenesis               |
| COG2941 | Ubiquinone biosynthesis protein COQ7                                                | H | Coenzyme transport and metabolism                             |
| COG0568 | DNA-directed RNA polymerase, sigma subunit (sigma70/sigma32)                        | K | Transcription                                                 |
| COG0162 | Tyrosyl-tRNA synthetase                                                             | J | Translation, ribosomal structure and biogenesis               |
| COG1981 | Predicted membrane protein                                                          | S | Function unknown                                              |
| COG0174 | Glutamine synthetase                                                                | E | Amino acid transport and metabolism                           |
| COG1327 | Predicted transcriptional regulator, consists of a Zn-ribbon and ATP-cone domains   | K | Transcription                                                 |
| COG0210 | Superfamily I DNA and RNA helicases                                                 | L | Replication, recombination and repair                         |
| COG0084 | Mg-dependent DNase                                                                  | L | Replication, recombination and repair                         |
| COG1952 | Preprotein translocase subunit SecB                                                 | U | Intracellular trafficking, secretion, and vesicular transport |
| COG4395 | Uncharacterized protein conserved in bacteria                                       | S | Function unknown                                              |
| COG0030 | Dimethyladenosine transferase (rRNA methylation)                                    | J | Translation, ribosomal structure and biogenesis               |
| COG0442 | Prolyl-tRNA synthetase                                                              | J | Translation, ribosomal structure and biogenesis               |
| COG0574 | Phosphoenolpyruvate synthase/pyruvate phosphate dikinase                            | G | Carbohydrate transport and metabolism                         |
| COG0259 | Pyridoxamine-phosphate oxidase                                                      | H | Coenzyme transport and metabolism                             |
| COG0029 | Aspartate oxidase                                                                   | H | Coenzyme transport and metabolism                             |
| COG0604 | NADPH:quinone reductase and related Zn-dependent oxidoreductases                    | C | Energy production and conversion                              |
| COG0654 | 2-polyprenyl-6-methoxyphenol hydroxylase and related FAD-dependent oxidoreductases  | H | Coenzyme transport and metabolism                             |
| COG0181 | Porphobilinogen deaminase                                                           | H | Coenzyme transport and metabolism                             |
| COG0702 | Predicted nucleoside-diphosphate-sugar epimerases                                   | M | Cell wall/membrane/envelope biogenesis                        |
| COG0242 | N-formylmethionyl-tRNA deformylase                                                  | J | Translation, ribosomal structure and biogenesis               |
| COG0113 | Delta-aminolevulinic acid dehydratase                                               | H | Coenzyme transport and metabolism                             |
| COG0356 | FOF1-type ATP synthase, subunit a                                                   | C | Energy production and conversion                              |
| COG0054 | Riboflavin synthase beta-chain                                                      | H | Coenzyme transport and metabolism                             |
| COG0706 | Preprotein translocase subunit YidC                                                 | U | Intracellular trafficking, secretion, and vesicular transport |
| COG1253 | Hemolysins and related proteins containing CBS domains                              | R | General function prediction only                              |
| COG0216 | Protein chain release factor A                                                      | J | Translation, ribosomal structure and biogenesis               |
| COG0204 | 1-acyl-sn-glycerol-3-phosphate acyltransferase                                      | I | Lipid transport and metabolism                                |
| COG0539 | Ribosomal protein S1                                                                | J | Translation, ribosomal structure and biogenesis               |
| COG1132 | ABC-type multidrug transport system, ATPase and permease components                 | V | Defense mechanisms                                            |

|         |                                                                                                               |   |                                                               |
|---------|---------------------------------------------------------------------------------------------------------------|---|---------------------------------------------------------------|
| COG0209 | Ribonucleotide reductase, alpha subunit                                                                       | F | Nucleotide transport and metabolism                           |
| COG0537 | Diadenosine tetraphosphate (Ap4A) hydrolase and other HIT family hydrolases                                   | F | Nucleotide transport and metabolism                           |
| COG0708 | Exonuclease III                                                                                               | L | Replication, recombination and repair                         |
| COG0341 | Preprotein translocase subunit SecF                                                                           | U | Intracellular trafficking, secretion, and vesicular transport |
| COG0465 | ATP-dependent Zn proteases                                                                                    | O | Posttranslational modification, protein turnover, chaperones  |
| COG0072 | Phenylalanyl-tRNA synthetase beta subunit                                                                     | J | Translation, ribosomal structure and biogenesis               |
| COG0849 | Actin-like ATPase involved in cell division                                                                   | D | Cell cycle control, cell division, chromosome partitioning    |
| COG0838 | NADH:ubiquinone oxidoreductase subunit 3 (chain A)                                                            | C | Energy production and conversion                              |
| COG0377 | NADH:ubiquinone oxidoreductase 20 kD subunit and related Fe-S oxidoreductases                                 | C | Energy production and conversion                              |
| COG0852 | NADH:ubiquinone oxidoreductase 27 kD subunit                                                                  | C | Energy production and conversion                              |
| COG0057 | Glyceraldehyde-3-phosphate dehydrogenase/erythrose-4-phosphate dehydrogenase                                  | G | Carbohydrate transport and metabolism                         |
| COG0126 | 3-phosphoglycerate kinase                                                                                     | G | Carbohydrate transport and metabolism                         |
| COG0761 | Penicillin tolerance protein                                                                                  | I | Lipid transport and metabolism                                |
| COG1587 | Uroporphyrinogen-III synthase                                                                                 | H | Coenzyme transport and metabolism                             |
| COG0743 | 1-deoxy-D-xylulose 5-phosphate reductoisomerase                                                               | I | Lipid transport and metabolism                                |
| COG0536 | Predicted GTPase                                                                                              | R | General function prediction only                              |
| COG4973 | Site-specific recombinase XerC                                                                                | L | Replication, recombination and repair                         |
| COG0047 | Phosphoribosylformylglycinamide (FGAM) synthase, glutamine amidotransferase domain                            | F | Nucleotide transport and metabolism                           |
| COG0304 | 3-oxoacyl-(acyl-carrier-protein) synthase                                                                     | I | Lipid transport and metabolism                                |
| COG0408 | Coproporphyrinogen III oxidase                                                                                | H | Coenzyme transport and metabolism                             |
| COG0232 | dGTP triphosphohydrolase                                                                                      | F | Nucleotide transport and metabolism                           |
| COG1381 | Recombinational DNA repair protein (RecF pathway)                                                             | L | Replication, recombination and repair                         |
| COG1249 | Pyruvate/2-oxoglutarate dehydrogenase complex, dihydrolipoamide dehydrogenase (E3) component, and related e   | C | Energy production and conversion                              |
| COG2239 | Mg/Co/Ni transporter MgtE (contains CBS domain)                                                               | P | Inorganic ion transport and metabolism                        |
| COG0482 | Predicted tRNA(5-methylaminomethyl-2-thiouridylate) methyltransferase, contains the PP-loop ATPase domain     | J | Translation, ribosomal structure and biogenesis               |
| COG0847 | DNA polymerase III, epsilon subunit and related 3'-5' exonucleases                                            | L | Replication, recombination and repair                         |
| COG0006 | Xaa-Pro aminopeptidase                                                                                        | E | Amino acid transport and metabolism                           |
| COG2945 | Predicted hydrolase of the alpha/beta superfamily                                                             | R | General function prediction only                              |
| COG3474 | Cytochrome c2                                                                                                 | C | Energy production and conversion                              |
| COG0299 | Folate-dependent phosphoribosylglycinamide formyltransferase PurN                                             | F | Nucleotide transport and metabolism                           |
| COG0260 | Leucyl aminopeptidase                                                                                         | E | Amino acid transport and metabolism                           |
| COG0581 | ABC-type phosphate transport system, permease component                                                       | P | Inorganic ion transport and metabolism                        |
| COG3842 | ABC-type spermidine/putrescine transport systems, ATPase components                                           | E | Amino acid transport and metabolism                           |
| COG2022 | Uncharacterized enzyme of thiazole biosynthesis                                                               | H | Coenzyme transport and metabolism                             |
| COG0294 | Dihydropterolate synthase and related enzymes                                                                 | H | Coenzyme transport and metabolism                             |
| COG0801 | 7,8-dihydro-6-hydroxymethylpterin-pyrophosphokinase                                                           | H | Coenzyme transport and metabolism                             |
| COG0192 | S-adenosylmethionine synthetase                                                                               | H | Coenzyme transport and metabolism                             |
| COG0718 | Uncharacterized protein conserved in bacteria                                                                 | S | Function unknown                                              |
| COG2812 | DNA polymerase III, gamma/tau subunits                                                                        | L | Replication, recombination and repair                         |
| COG5424 | Pyrroloquinoline quinone (Coenzyme PQQ) biosynthesis protein C                                                | H | Coenzyme transport and metabolism                             |
| COG0815 | Apolipoprotein N-acyltransferase                                                                              | M | Cell wall/membrane/envelope biogenesis                        |
| COG0117 | Pyrimidine deaminase                                                                                          | H | Coenzyme transport and metabolism                             |
| COG0505 | Carbamoylphosphate synthase small subunit                                                                     | E | Amino acid transport and metabolism                           |
| COG0254 | Ribosomal protein L31                                                                                         | J | Translation, ribosomal structure and biogenesis               |
| COG3820 | Uncharacterized protein conserved in bacteria                                                                 | S | Function unknown                                              |
| COG0755 | ABC-type transport system involved in cytochrome c biogenesis, permease component                             | O | Posttranslational modification, protein turnover, chaperones  |
| COG0540 | Aspartate carbamoyltransferase, catalytic chain                                                               | F | Nucleotide transport and metabolism                           |
| COG0208 | Ribonucleotide reductase, beta subunit                                                                        | F | Nucleotide transport and metabolism                           |
| COG0195 | Transcription elongation factor                                                                               | K | Transcription                                                 |
| COG0516 | IMP dehydrogenase/GMP reductase                                                                               | F | Nucleotide transport and metabolism                           |
| COG1463 | ABC-type transport system involved in resistance to organic solvents, periplasmic component                   | Q | Secondary metabolites biosynthesis, transport and catabolism  |
| COG0349 | Ribonuclease D                                                                                                | J | Translation, ribosomal structure and biogenesis               |
| COG0468 | RecA/RadA recombinase                                                                                         | L | Replication, recombination and repair                         |
| COG0479 | Succinate dehydrogenase/fumarate reductase, Fe-S protein subunit                                              | C | Energy production and conversion                              |
| COG0484 | DnaJ-class molecular chaperone with C-terminal Zn finger domain                                               | O | Posttranslational modification, protein turnover, chaperones  |
| COG1160 | Predicted GTPases                                                                                             | R | General function prediction only                              |
| COG0461 | Orotate phosphoribosyltransferase                                                                             | F | Nucleotide transport and metabolism                           |
| COG0541 | Signal recognition particle GTPase                                                                            | U | Intracellular trafficking, secretion, and vesicular transport |
| COG0552 | Signal recognition particle GTPase                                                                            | U | Intracellular trafficking, secretion, and vesicular transport |
| COG0293 | 23S rRNA methylase                                                                                            | J | Translation, ribosomal structure and biogenesis               |
| COG0125 | Thymidylate kinase                                                                                            | F | Nucleotide transport and metabolism                           |
| COG0508 | Pyruvate/2-oxoglutarate dehydrogenase complex, dihydrolipoamide acyltransferase (E2) component, and related e | C | Energy production and conversion                              |
| COG0312 | Predicted Zn-dependent proteases and their inactivated homologs                                               | R | General function prediction only                              |
| COG1999 | Uncharacterized protein SCO1/SenC/PrrC, involved in biogenesis of respiratory and photosynthetic systems      | R | General function prediction only                              |
| COG0305 | Replicative DNA helicase                                                                                      | L | Replication, recombination and repair                         |
| COG0564 | Pseudouridylyl synthases, 23S RNA-specific                                                                    | J | Translation, ribosomal structure and biogenesis               |
| COG0492 | Thioredoxin reductase                                                                                         | O | Posttranslational modification, protein turnover, chaperones  |
| COG0450 | Peroxiredoxin                                                                                                 | O | Posttranslational modification, protein turnover, chaperones  |
| COG0105 | Nucleoside diphosphate kinase                                                                                 | F | Nucleotide transport and metabolism                           |
| COG0728 | Uncharacterized membrane protein, putative virulence factor                                                   | R | General function prediction only                              |
| COG1009 | NADH:ubiquinone oxidoreductase subunit 5 (chain L)/Multisubunit Na+/H+ antiporter, MnhA subunit               | C | Energy production and conversion                              |
| COG0172 | Seryl-tRNA synthetase                                                                                         | J | Translation, ribosomal structure and biogenesis               |
| COG0324 | tRNA delta(2)-isopentenylpyrophosphate transferase                                                            | J | Translation, ribosomal structure and biogenesis               |
| COG1138 | Cytochrome c biogenesis factor                                                                                | O | Posttranslational modification, protein turnover, chaperones  |
| COG1235 | Metal-dependent hydrolases of the beta-lactamase superfamily I                                                | R | General function prediction only                              |
| COG0522 | Ribosomal protein S4 and related proteins                                                                     | J | Translation, ribosomal structure and biogenesis               |
| COG0302 | GTP cyclohydrolase I                                                                                          | H | Coenzyme transport and metabolism                             |
| COG0224 | FOF1-type ATP synthase, gamma subunit                                                                         | C | Energy production and conversion                              |
| COG0812 | UDP-N-acetylmuramate dehydrogenase                                                                            | M | Cell wall/membrane/envelope biogenesis                        |
| COG1494 | Fructose-1,6-bisphosphatase/sedoheptulose 1,7-bisphosphatase and related proteins                             | G | Carbohydrate transport and metabolism                         |
| COG4122 | Predicted O-methyltransferase                                                                                 | R | General function prediction only                              |
| COG1048 | Aconitase A                                                                                                   | C | Energy production and conversion                              |
| COG1565 | Uncharacterized conserved protein                                                                             | S | Function unknown                                              |
| COG0525 | Valyl-tRNA synthetase                                                                                         | J | Translation, ribosomal structure and biogenesis               |
| COG1186 | Protein chain release factor B                                                                                | J | Translation, ribosomal structure and biogenesis               |
| COG0161 | Adenosylmethionine-8-amino-7-oxononanoate aminotransferase                                                    | H | Coenzyme transport and metabolism                             |

|         |                                                                                                             |   |                                                               |
|---------|-------------------------------------------------------------------------------------------------------------|---|---------------------------------------------------------------|
| COG1622 | Heme/copper-type cytochrome/quinol oxidases, subunit 2                                                      | C | Energy production and conversion                              |
| COG0843 | Heme/copper-type cytochrome/quinol oxidases, subunit 1                                                      | C | Energy production and conversion                              |
| COG0109 | Polyprenyltransferase (cytochrome oxidase assembly factor)                                                  | O | Posttranslational modification, protein turnover, chaperones  |
| COG0723 | Rieske Fe-S protein                                                                                         | C | Energy production and conversion                              |
| COG1290 | Cytochrome b subunit of the bc complex                                                                      | C | Energy production and conversion                              |
| COG2857 | Cytochrome c1                                                                                               | C | Energy production and conversion                              |
| COG0342 | Preprotein translocase subunit SecD                                                                         | U | Intracellular trafficking, secretion, and vesicular transport |
| COG2227 | 2-polyprenyl-3-methyl-5-hydroxy-6-methoxy-1,4-benzoquinol methylase                                         | H | Coenzyme transport and metabolism                             |
| COG0416 | Fatty acid/phospholipid biosynthesis enzyme                                                                 | I | Lipid transport and metabolism                                |
| COG0333 | Ribosomal protein L32                                                                                       | J | Translation, ribosomal structure and biogenesis               |
| COG1905 | NADH:ubiquinone oxidoreductase 24 kD subunit                                                                | C | Energy production and conversion                              |
| COG0661 | Predicted unusual protein kinase                                                                            | R | General function prediction only                              |
| COG0776 | Bacterial nucleoid DNA-binding protein                                                                      | L | Replication, recombination and repair                         |
| COG0217 | Uncharacterized conserved protein                                                                           | S | Function unknown                                              |
| COG0459 | Chaperonin GroEL (HSP60 family)                                                                             | O | Posttranslational modification, protein turnover, chaperones  |
| COG0234 | Co-chaperonin GroES (HSP10)                                                                                 | O | Posttranslational modification, protein turnover, chaperones  |
| COG0617 | tRNA nucleotidyltransferase/poly(A) polymerase                                                              | J | Translation, ribosomal structure and biogenesis               |
| COG0764 | 3-hydroxymyristoyl/3-hydroxydecanoyl-(acyl carrier protein) dehydratases                                    | I | Lipid transport and metabolism                                |
| COG1028 | Dehydrogenases with different specificities (related to short-chain alcohol dehydrogenases)                 | I | Lipid transport and metabolism                                |
| COG0328 | Ribonuclease HI                                                                                             | L | Replication, recombination and repair                         |
| COG0782 | Transcription elongation factor                                                                             | K | Transcription                                                 |
| COG0749 | DNA polymerase I - 3'-5' exonuclease and polymerase domains                                                 | L | Replication, recombination and repair                         |
| COG1845 | Heme/copper-type cytochrome/quinol oxidase, subunit 3                                                       | C | Energy production and conversion                              |
| COG0081 | Ribosomal protein L1                                                                                        | J | Translation, ribosomal structure and biogenesis               |
| COG0080 | Ribosomal protein L11                                                                                       | J | Translation, ribosomal structure and biogenesis               |
| COG0250 | Transcription antiterminator                                                                                | K | Transcription                                                 |
| COG0049 | Ribosomal protein S7                                                                                        | J | Translation, ribosomal structure and biogenesis               |
| COG0048 | Ribosomal protein S12                                                                                       | J | Translation, ribosomal structure and biogenesis               |
| COG1008 | NADH:ubiquinone oxidoreductase subunit 4 (chain M)                                                          | C | Energy production and conversion                              |
| COG1007 | NADH:ubiquinone oxidoreductase subunit 2 (chain N)                                                          | C | Energy production and conversion                              |
| COG0340 | Biotin-(acetyl-CoA carboxylase) ligase                                                                      | H | Coenzyme transport and metabolism                             |
| COG0142 | Geranylgeranyl pyrophosphate synthase                                                                       | H | Coenzyme transport and metabolism                             |
| COG0767 | ABC-type transport system involved in resistance to organic solvents, permease component                    | Q | Secondary metabolites biosynthesis, transport and catabolism  |
| COG1127 | ABC-type transport system involved in resistance to organic solvents, ATPase component                      | Q | Secondary metabolites biosynthesis, transport and catabolism  |
| COG0802 | Predicted ATPase or kinase                                                                                  | R | General function prediction only                              |
| COG0164 | Ribonuclease HII                                                                                            | L | Replication, recombination and repair                         |
| COG0021 | Transketolase                                                                                               | G | Carbohydrate transport and metabolism                         |
| COG0651 | Formate hydrogenylase subunit 3/Multisubunit Na <sup>+</sup> /H <sup>+</sup> antiporter, MnhD subunit       | C | Energy production and conversion                              |
| COG0608 | Single-stranded DNA-specific exonuclease                                                                    | L | Replication, recombination and repair                         |
| COG0285 | Folypolyglutamate synthase                                                                                  | H | Coenzyme transport and metabolism                             |
| COG4775 | Outer membrane protein/protective antigen OMA87                                                             | M | Cell wall/membrane/envelope biogenesis                        |
| COG0750 | Predicted membrane-associated Zn-dependent proteases 1                                                      | M | Cell wall/membrane/envelope biogenesis                        |
| COG1947 | 4-diphosphocytidyl-2C-methyl-D-erythritol 2-phosphate synthase                                              | I | Lipid transport and metabolism                                |
| COG1225 | Peroxiredoxin                                                                                               | O | Posttranslational modification, protein turnover, chaperones  |
| COG0194 | Guanylate kinase                                                                                            | F | Nucleotide transport and metabolism                           |
| COG0372 | Citrate synthase                                                                                            | C | Energy production and conversion                              |
| COG0148 | Enolase                                                                                                     | G | Carbohydrate transport and metabolism                         |
| COG0008 | Glutamyl- and glutamyl-tRNA synthetases                                                                     | J | Translation, ribosomal structure and biogenesis               |
| COG0344 | Predicted membrane protein                                                                                  | S | Function unknown                                              |
| COG0022 | Pyruvate/2-oxoglutarate dehydrogenase complex, dehydrogenase (E1) component, eukaryotic type, beta subunit  | C | Energy production and conversion                              |
| COG0544 | FKBP-type peptidyl-prolyl cis-trans isomerase (trigger factor)                                              | O | Posttranslational modification, protein turnover, chaperones  |
| COG0740 | Protease subunit of ATP-dependent Clp proteases                                                             | O | Posttranslational modification, protein turnover, chaperones  |
| COG0751 | Glycyl-tRNA synthetase, beta subunit                                                                        | J | Translation, ribosomal structure and biogenesis               |
| COG0752 | Glycyl-tRNA synthetase, alpha subunit                                                                       | J | Translation, ribosomal structure and biogenesis               |
| COG0436 | Aspartate/tyrosine/aromatic aminotransferase                                                                | E | Amino acid transport and metabolism                           |
| COG0629 | Single-stranded DNA-binding protein                                                                         | L | Replication, recombination and repair                         |
| COG5590 | Uncharacterized conserved protein                                                                           | S | Function unknown                                              |
| COG0176 | Transaldolase                                                                                               | G | Carbohydrate transport and metabolism                         |
| COG1384 | Lysyl-tRNA synthetase (class I)                                                                             | J | Translation, ribosomal structure and biogenesis               |
| COG0476 | Dinucleotide-utilizing enzymes involved in molybdopterin and thiamine biosynthesis family 2                 | H | Coenzyme transport and metabolism                             |
| COG0492 | Thioredoxin reductase                                                                                       | O | Posttranslational modification, protein turnover, chaperones  |
| COG0124 | Histidyl-tRNA synthetase                                                                                    | J | Translation, ribosomal structure and biogenesis               |
| COG0271 | Stress-induced morphogen (activity unknown)                                                                 | T | Signal transduction mechanisms                                |
| COG0681 | Signal peptidase I                                                                                          | U | Intracellular trafficking, secretion, and vesicular transport |
| COG0621 | 2-methylthioadenine synthetase                                                                              | J | Translation, ribosomal structure and biogenesis               |
| COG0276 | Protoheme ferro-lyase (ferrochelataase)                                                                     | H | Coenzyme transport and metabolism                             |
| COG0268 | Ribosomal protein S20                                                                                       | J | Translation, ribosomal structure and biogenesis               |
| COG0284 | Orotidine-5'-phosphate decarboxylase                                                                        | F | Nucleotide transport and metabolism                           |
| COG1538 | Outer membrane protein                                                                                      | M | Cell wall/membrane/envelope biogenesis                        |
| COG0821 | Enzyme involved in the deoxyxylulose pathway of isoprenoid biosynthesis                                     | I | Lipid transport and metabolism                                |
| COG0483 | Archaeal fructose-1,6-bisphosphatase and related enzymes of inositol monophosphatase family                 | G | Carbohydrate transport and metabolism                         |
| COG1071 | Pyruvate/2-oxoglutarate dehydrogenase complex, dehydrogenase (E1) component, eukaryotic type, alpha subunit | C | Energy production and conversion                              |
| COG0382 | 4-hydroxybenzoate polyprenyltransferase and related prenyltransferases                                      | H | Coenzyme transport and metabolism                             |
| COG1853 | Conserved protein/domain typically associated with flavoprotein oxygenases, DIM6/NTAB family                | R | General function prediction only                              |
| COG1117 | ABC-type phosphate transport system, ATPase component                                                       | P | Inorganic ion transport and metabolism                        |
| COG0691 | tmRNA-binding protein                                                                                       | O | Posttranslational modification, protein turnover, chaperones  |
| COG0046 | Phosphoribosylformylglycinamide (FGAM) synthase, synthetase domain                                          | F | Nucleotide transport and metabolism                           |
| COG2271 | Sugar phosphate permease                                                                                    | G | Carbohydrate transport and metabolism                         |
| COG0462 | Phosphoribosylpyrophosphate synthetase                                                                      | F | Nucleotide transport and metabolism                           |
| COG0694 | Thioredoxin-like proteins and domains                                                                       | O | Posttranslational modification, protein turnover, chaperones  |
| COG1143 | Formate hydrogenylase subunit 6/NADH:ubiquinone oxidoreductase 23 kD subunit (chain I)                      | C | Energy production and conversion                              |
| COG0190 | 5,10-methylene-tetrahydrofolate dehydrogenase/Methenyl tetrahydrofolate cyclohydrolase                      | H | Coenzyme transport and metabolism                             |
| COG0156 | 7-keto-8-aminopelargonate synthetase and related enzymes                                                    | H | Coenzyme transport and metabolism                             |
| COG2332 | Cytochrome c-type biogenesis protein CcmE                                                                   | O | Posttranslational modification, protein turnover, chaperones  |
| COG0595 | Predicted hydrolase of the metallo-beta-lactamase superfamily                                               | R | General function prediction only                              |
| COG0621 | 2-methylthioadenine synthetase                                                                              | J | Translation, ribosomal structure and biogenesis               |

|         |                                                                                                                |   |                                                              |
|---------|----------------------------------------------------------------------------------------------------------------|---|--------------------------------------------------------------|
| COG0415 | Deoxyribodipyrimidine photolyase                                                                               | L | Replication, recombination and repair                        |
| COG0103 | Ribosomal protein S9                                                                                           | J | Translation, ribosomal structure and biogenesis              |
| COG0102 | Ribosomal protein L13                                                                                          | J | Translation, ribosomal structure and biogenesis              |
| COG4666 | TRAP-type uncharacterized transport system, fused permease components                                          | R | General function prediction only                             |
| COG0605 | Superoxide dismutase                                                                                           | P | Inorganic ion transport and metabolism                       |
| COG0235 | Ribulose-5-phosphate 4-epimerase and related epimerases and aldolases                                          | G | Carbohydrate transport and metabolism                        |
| COG4992 | Ornithine/acetylornithine aminotransferase                                                                     | E | Amino acid transport and metabolism                          |
| COG0652 | Peptidyl-prolyl cis-trans isomerase (rotamase) - cyclophilin family                                            | O | Posttranslational modification, protein turnover, chaperones |
| COG0152 | Phosphoribosylaminoimidazolesuccinocarboxamide (SAICAR) synthase                                               | F | Nucleotide transport and metabolism                          |
| COG0307 | Riboflavin synthase alpha chain                                                                                | H | Coenzyme transport and metabolism                            |
| COG0682 | Prolipoprotein diacylglyceryltransferase                                                                       | M | Cell wall/membrane/envelope biogenesis                       |
| COG1612 | Uncharacterized protein required for cytochrome oxidase assembly                                               | O | Posttranslational modification, protein turnover, chaperones |
| COG1132 | ABC-type multidrug transport system, ATPase and permease components                                            | V | Defense mechanisms                                           |
| COG0424 | Nucleotide-binding protein implicated in inhibition of septum formation                                        | D | Cell cycle control, cell division, chromosome partitioning   |
| COG0361 | Translation initiation factor 1 (IF-1)                                                                         | J | Translation, ribosomal structure and biogenesis              |
| COG1225 | Peroxioredoxin                                                                                                 | O | Posttranslational modification, protein turnover, chaperones |
| COG0519 | GMP synthase, PP-ATPase domain/subunit                                                                         | F | Nucleotide transport and metabolism                          |
| COG0489 | ATPases involved in chromosome partitioning                                                                    | D | Cell cycle control, cell division, chromosome partitioning   |
| COG2945 | Predicted hydrolase of the alpha/beta superfamily                                                              | R | General function prediction only                             |
| COG0143 | Methionyl-tRNA synthetase                                                                                      | J | Translation, ribosomal structure and biogenesis              |
| COG3118 | Thioredoxin domain-containing protein                                                                          | O | Posttranslational modification, protein turnover, chaperones |
| COG0335 | Ribosomal protein L19                                                                                          | J | Translation, ribosomal structure and biogenesis              |
| COG0336 | tRNA-(guanine-N1)-methyltransferase                                                                            | J | Translation, ribosomal structure and biogenesis              |
| COG0211 | Ribosomal protein L27                                                                                          | J | Translation, ribosomal structure and biogenesis              |
| COG0261 | Ribosomal protein L21                                                                                          | J | Translation, ribosomal structure and biogenesis              |
| COG0353 | Recombinational DNA repair protein (RecF pathway)                                                              | L | Replication, recombination and repair                        |
| COG1651 | Protein-disulfide isomerase                                                                                    | O | Posttranslational modification, protein turnover, chaperones |
| COG0012 | Predicted GTPase, probable translation factor                                                                  | J | Translation, ribosomal structure and biogenesis              |
| COG0597 | Lipoprotein signal peptidase                                                                                   | M | Cell wall/membrane/envelope biogenesis                       |
| COG2317 | Zn-dependent carboxypeptidase                                                                                  | E | Amino acid transport and metabolism                          |
| COG0571 | dsRNA-specific ribonuclease                                                                                    | K | Transcription                                                |
| COG0275 | Predicted S-adenosylmethionine-dependent methyltransferase involved in cell envelope biogenesis                | M | Cell wall/membrane/envelope biogenesis                       |
| COG0220 | Predicted S-adenosylmethionine-dependent methyltransferase                                                     | R | General function prediction only                             |
| COG4105 | DNA uptake lipoprotein                                                                                         | R | General function prediction only                             |
| COG0151 | Phosphoribosylamine-glycine ligase                                                                             | F | Nucleotide transport and metabolism                          |
| COG0329 | Dihydrodipicolinate synthase/N-acetylneuraminate lyase                                                         | E | Amino acid transport and metabolism                          |
| COG3038 | Cytochrome B561                                                                                                | C | Energy production and conversion                             |
| COG2853 | Surface lipoprotein                                                                                            | M | Cell wall/membrane/envelope biogenesis                       |
| COG2854 | ABC-type transport system involved in resistance to organic solvents, auxiliary component                      | Q | Secondary metabolites biosynthesis, transport and catabolism |
| COG0371 | Glycerol dehydrogenase and related enzymes                                                                     | C | Energy production and conversion                             |
| COG0575 | CDP-diglyceride synthetase                                                                                     | I | Lipid transport and metabolism                               |
| COG0020 | Undecaprenyl pyrophosphate synthase                                                                            | I | Lipid transport and metabolism                               |
| COG0233 | Ribosome recycling factor                                                                                      | J | Translation, ribosomal structure and biogenesis              |
| COG0528 | Uridylate kinase                                                                                               | F | Nucleotide transport and metabolism                          |
| COG4586 | ABC-type uncharacterized transport system, ATPase component                                                    | R | General function prediction only                             |
| COG0264 | Translation elongation factor Ts                                                                               | J | Translation, ribosomal structure and biogenesis              |
| COG0052 | Ribosomal protein S2                                                                                           | J | Translation, ribosomal structure and biogenesis              |
| COG2226 | Methylase involved in ubiquinone/menaquinone biosynthesis                                                      | H | Coenzyme transport and metabolism                            |
| COG0508 | Pyruvate/2-oxoglutarate dehydrogenase complex, dihydroliipoamide acyltransferase (E2) component, and related e | C | Energy production and conversion                             |
| COG0351 | Hydroxymethylpyrimidine/phosphomethylpyrimidine kinase                                                         | H | Coenzyme transport and metabolism                            |
| COG0039 | Malate/lactate dehydrogenases                                                                                  | C | Energy production and conversion                             |
| COG0756 | dUTPase                                                                                                        | F | Nucleotide transport and metabolism                          |
| COG1159 | GTPase                                                                                                         | R | General function prediction only                             |
| COG0331 | (acyl-carrier-protein) S-malonyltransferase                                                                    | I | Lipid transport and metabolism                               |
| COG0358 | DNA primase (bacterial type)                                                                                   | L | Replication, recombination and repair                        |
| COG0736 | Phosphopantetheinyl transferase (holo-ACP synthase)                                                            | I | Lipid transport and metabolism                               |
| COG0717 | Deoxycytidine deaminase                                                                                        | F | Nucleotide transport and metabolism                          |
| COG0026 | Phosphoribosylaminoimidazole carboxylase (NCAR synthetase)                                                     | F | Nucleotide transport and metabolism                          |
| COG1028 | Dehydrogenases with different specificities (related to short-chain alcohol dehydrogenases)                    | I | Lipid transport and metabolism                               |
| COG0407 | Uroporphyrinogen-III decarboxylase                                                                             | H | Coenzyme transport and metabolism                            |
| COG0379 | Quinolinate synthase                                                                                           | H | Coenzyme transport and metabolism                            |
| COG0669 | Phosphopantetheine adenyllyltransferase                                                                        | H | Coenzyme transport and metabolism                            |
| COG0334 | Glutamate dehydrogenase/leucine dehydrogenase                                                                  | E | Amino acid transport and metabolism                          |
| COG0277 | FAD/FMN-containing dehydrogenases                                                                              | C | Energy production and conversion                             |
| COG0277 | FAD/FMN-containing dehydrogenases                                                                              | C | Energy production and conversion                             |
| COG0247 | Fe-S oxidoreductase                                                                                            | C | Energy production and conversion                             |
| COG4638 | Phenylpropionate dioxygenase and related ring-hydroxylating dioxygenases, large terminal subunit               | P | Inorganic ion transport and metabolism                       |
| COG1083 | CMP-N-acetylneuraminic acid synthetase                                                                         | M | Cell wall/membrane/envelope biogenesis                       |
| COG2154 | Pterin-4a-carbinolamine dehydratase                                                                            | H | Coenzyme transport and metabolism                            |
| COG1960 | Acyl-CoA dehydrogenases                                                                                        | I | Lipid transport and metabolism                               |
| COG0277 | FAD/FMN-containing dehydrogenases                                                                              | C | Energy production and conversion                             |
| COG0009 | Putative translation factor (SUA5)                                                                             | J | Translation, ribosomal structure and biogenesis              |
| COG0438 | Glycosyltransferase                                                                                            | M | Cell wall/membrane/envelope biogenesis                       |
| COG2605 | Predicted kinase related to galactokinase and mevalonate kinase                                                | R | General function prediction only                             |
| COG2377 | Predicted molecular chaperone distantly related to HSP70-fold metalloproteases                                 | O | Posttranslational modification, protein turnover, chaperones |
| COG1045 | Serine acetyltransferase                                                                                       | E | Amino acid transport and metabolism                          |
| COG1959 | Predicted transcriptional regulator                                                                            | K | Transcription                                                |
| COG2175 | Probable taurine catabolism dioxygenase                                                                        | Q | Secondary metabolites biosynthesis, transport and catabolism |
| COG0596 | Predicted hydrolases or acyltransferases (alpha/beta hydrolase superfamily)                                    | R | General function prediction only                             |
| COG0329 | Dihydrodipicolinate synthase/N-acetylneuraminate lyase                                                         | E | Amino acid transport and metabolism                          |
| COG0530 | Ca <sup>2+</sup> /Na <sup>+</sup> antiporter                                                                   | P | Inorganic ion transport and metabolism                       |
| COG0762 | Predicted integral membrane protein                                                                            | S | Function unknown                                             |
| COG1664 | Integral membrane protein CcmA involved in cell shape determination                                            | M | Cell wall/membrane/envelope biogenesis                       |
| COG4221 | Short-chain alcohol dehydrogenase of unknown specificity                                                       | R | General function prediction only                             |
| COG3427 | Uncharacterized conserved protein                                                                              | S | Function unknown                                             |
| COG0432 | Uncharacterized conserved protein                                                                              | S | Function unknown                                             |

|         |                                                                                                       |   |                                                              |
|---------|-------------------------------------------------------------------------------------------------------|---|--------------------------------------------------------------|
| COG2951 | Membrane-bound lytic murein transglycosylase B                                                        | M | Cell wall/membrane/envelope biogenesis                       |
| COG1454 | Alcohol dehydrogenase, class IV                                                                       | C | Energy production and conversion                             |
| COG0765 | ABC-type amino acid transport system, permease component                                              | E | Amino acid transport and metabolism                          |
| COG0019 | Diaminopimelate decarboxylase                                                                         | E | Amino acid transport and metabolism                          |
| COG1247 | Sortase and related acyltransferases                                                                  | M | Cell wall/membrane/envelope biogenesis                       |
| COG2717 | Predicted membrane protein                                                                            | S | Function unknown                                             |
| COG4215 | ABC-type arginine transport system, permease component                                                | E | Amino acid transport and metabolism                          |
| COG0386 | Glutathione peroxidase                                                                                | O | Posttranslational modification, protein turnover, chaperones |
| COG0205 | 6-phosphofructokinase                                                                                 | G | Carbohydrate transport and metabolism                        |
| COG0834 | ABC-type amino acid transport/signal transduction systems, periplasmic component/domain               | E | Amino acid transport and metabolism                          |
| COG0604 | NADPH:quinone reductase and related Zn-dependent oxidoreductases                                      | C | Energy production and conversion                             |
| COG1126 | ABC-type polar amino acid transport system, ATPase component                                          | E | Amino acid transport and metabolism                          |
| COG2068 | Uncharacterized MobA-related protein                                                                  | R | General function prediction only                             |
| COG0345 | Pyrraline-5-carboxylate reductase                                                                     | E | Amino acid transport and metabolism                          |
| COG2606 | Uncharacterized conserved protein                                                                     | S | Function unknown                                             |
| COG0318 | Acyl-CoA synthetases (AMP-forming)/AMP-acid ligases II                                                | I | Lipid transport and metabolism                               |
| COG3011 | Uncharacterized protein conserved in bacteria                                                         | S | Function unknown                                             |
| COG0859 | ADP-heptose:LPS heptosyltransferase                                                                   | M | Cell wall/membrane/envelope biogenesis                       |
| COG0661 | Predicted unusual protein kinase                                                                      | R | General function prediction only                             |
| COG0739 | Membrane proteins related to metalloendopeptidases                                                    | M | Cell wall/membrane/envelope biogenesis                       |
| COG1164 | Oligoendopeptidase F                                                                                  | E | Amino acid transport and metabolism                          |
| COG0365 | Acyl-coenzyme A synthetases/AMP-(fatty) acid ligases                                                  | I | Lipid transport and metabolism                               |
| COG4133 | ABC-type transport system involved in cytochrome c biogenesis, ATPase component                       | O | Posttranslational modification, protein turnover, chaperones |
| COG3288 | NAD/NADP transhydrogenase alpha subunit                                                               | C | Energy production and conversion                             |
| COG3288 | NAD/NADP transhydrogenase alpha subunit                                                               | C | Energy production and conversion                             |
| COG1282 | NAD/NADP transhydrogenase beta subunit                                                                | C | Energy production and conversion                             |
| COG5470 | Uncharacterized conserved protein                                                                     | S | Function unknown                                             |
| COG0413 | Ketopantoate hydroxymethyltransferase                                                                 | H | Coenzyme transport and metabolism                            |
| COG0828 | Ribosomal protein S21                                                                                 | J | Translation, ribosomal structure and biogenesis              |
| COG0651 | Formate hydrogenlyase subunit 3/Multisubunit Na <sup>+</sup> /H <sup>+</sup> antiporter, MnhD subunit | C | Energy production and conversion                             |
| COG3914 | Predicted O-linked N-acetylglucosamine transferase, SPINDLY family                                    | O | Posttranslational modification, protein turnover, chaperones |
| COG0560 | Phosphoserine phosphatase                                                                             | E | Amino acid transport and metabolism                          |
| COG0440 | Acetolactate synthase, small (regulatory) subunit                                                     | E | Amino acid transport and metabolism                          |
| COG0059 | Ketol-acid reductoisomerase                                                                           | E | Amino acid transport and metabolism                          |
| COG1077 | Actin-like ATPase involved in cell morphogenesis                                                      | D | Cell cycle control, cell division, chromosome partitioning   |
| COG1792 | Cell shape-determining protein                                                                        | M | Cell wall/membrane/envelope biogenesis                       |
| COG0768 | Cell division protein FtsI/penicillin-binding protein 2                                               | M | Cell wall/membrane/envelope biogenesis                       |
| COG1280 | Putative threonine efflux protein                                                                     | E | Amino acid transport and metabolism                          |
| COG3845 | ABC-type uncharacterized transport systems, ATPase components                                         | R | General function prediction only                             |
| COG0559 | Branched-chain amino acid ABC-type transport system, permease components                              | E | Amino acid transport and metabolism                          |
| COG0410 | ABC-type branched-chain amino acid transport systems, ATPase component                                | E | Amino acid transport and metabolism                          |
| COG1529 | Aerobic-type carbon monoxide dehydrogenase, large subunit CoxL/CutL homologs                          | C | Energy production and conversion                             |
| COG1863 | Multisubunit Na <sup>+</sup> /H <sup>+</sup> antiporter, MnhE subunit                                 | P | Inorganic ion transport and metabolism                       |
| COG2135 | Uncharacterized conserved protein                                                                     | S | Function unknown                                             |
| COG1525 | Micrococcal nuclease (thermonuclease) homologs                                                        | L | Replication, recombination and repair                        |
| COG1733 | Predicted transcriptional regulators                                                                  | K | Transcription                                                |
| COG0526 | Thiol-disulfide isomerase and thioredoxins                                                            | O | Posttranslational modification, protein turnover, chaperones |
| COG1442 | Lipopolysaccharide biosynthesis proteins, LPS:glycosyltransferases                                    | M | Cell wall/membrane/envelope biogenesis                       |
| COG3088 | Uncharacterized protein involved in biosynthesis of c-type cytochromes                                | O | Posttranslational modification, protein turnover, chaperones |
| COG0521 | Molybdopterin biosynthesis enzymes                                                                    | H | Coenzyme transport and metabolism                            |
| COG1238 | Predicted membrane protein                                                                            | S | Function unknown                                             |
| COG0469 | Pyruvate kinase                                                                                       | G | Carbohydrate transport and metabolism                        |
| COG1238 | Predicted membrane protein                                                                            | S | Function unknown                                             |
| COG0239 | Integral membrane protein possibly involved in chromosome condensation                                | D | Cell cycle control, cell division, chromosome partitioning   |
| COG4603 | ABC-type uncharacterized transport system, permease component                                         | R | General function prediction only                             |
| COG1079 | Uncharacterized ABC-type transport system, permease component                                         | R | General function prediction only                             |
| COG1744 | Uncharacterized ABC-type transport system, periplasmic component/surface lipoprotein                  | R | General function prediction only                             |
| COG0607 | Rhodanese-related sulfurtransferase                                                                   | P | Inorganic ion transport and metabolism                       |
| COG4301 | Uncharacterized conserved protein                                                                     | S | Function unknown                                             |
| COG1109 | Phosphomannomutase                                                                                    | G | Carbohydrate transport and metabolism                        |
| COG0347 | Nitrogen regulatory protein PII                                                                       | E | Amino acid transport and metabolism                          |
| COG0137 | Argininosuccinate synthase                                                                            | E | Amino acid transport and metabolism                          |
| COG0713 | NADH:ubiquinone oxidoreductase subunit 11 or 4L (chain K)                                             | C | Energy production and conversion                             |
| COG0820 | Predicted Fe-S-cluster redox enzyme                                                                   | R | General function prediction only                             |
| COG1043 | Acyl-[acyl carrier protein]-UDP-N-acetylglucosamine O-acyltransferase                                 | M | Cell wall/membrane/envelope biogenesis                       |
| COG3494 | Uncharacterized protein conserved in bacteria                                                         | S | Function unknown                                             |
| COG0763 | Lipid A disaccharide synthetase                                                                       | M | Cell wall/membrane/envelope biogenesis                       |
| COG1595 | DNA-directed RNA polymerase specialized sigma subunit, sigma24 homolog                                | K | Transcription                                                |
| COG0346 | Lactoylglutathione lyase and related lyases                                                           | E | Amino acid transport and metabolism                          |
| COG0625 | Glutathione S-transferase                                                                             | O | Posttranslational modification, protein turnover, chaperones |
| COG3806 | Anti-sigma factor                                                                                     | T | Signal transduction mechanisms                               |
| COG1974 | SOS-response transcriptional repressors (RecA-mediated autopeptidases)                                | K | Transcription                                                |
| COG0303 | Molybdopterin biosynthesis enzyme                                                                     | H | Coenzyme transport and metabolism                            |
| COG0315 | Molybdenum cofactor biosynthesis enzyme                                                               | H | Coenzyme transport and metabolism                            |
| COG0456 | Acetyltransferases                                                                                    | R | General function prediction only                             |
| COG0134 | Indole-3-glycerol phosphate synthase                                                                  | E | Amino acid transport and metabolism                          |
| COG0547 | Anthranilate phosphoribosyltransferase                                                                | E | Amino acid transport and metabolism                          |
| COG0512 | Anthranilate/para-aminobenzoate synthases component II                                                | E | Amino acid transport and metabolism                          |
| COG0147 | Anthranilate/para-aminobenzoate synthases component I                                                 | E | Amino acid transport and metabolism                          |
| COG0149 | Triosephosphate isomerase                                                                             | G | Carbohydrate transport and metabolism                        |
| COG2877 | 3-deoxy-D-manno-octulosonic acid (KDO) 8-phosphate synthase                                           | M | Cell wall/membrane/envelope biogenesis                       |
| COG2175 | Probable taurine catabolism dioxygenase                                                               | Q | Secondary metabolites biosynthesis, transport and catabolism |
| COG1729 | Uncharacterized protein conserved in bacteria                                                         | S | Function unknown                                             |
| COG0705 | Uncharacterized membrane protein (homolog of Drosophila rhomboid)                                     | R | General function prediction only                             |
| COG0678 | Peroxiredoxin                                                                                         | O | Posttranslational modification, protein turnover, chaperones |
| COG4448 | L-asparaginase II                                                                                     | E | Amino acid transport and metabolism                          |

|         |                                                                                                           |   |                                                              |
|---------|-----------------------------------------------------------------------------------------------------------|---|--------------------------------------------------------------|
| COG2897 | Rhodanese-related sulfurtransferase                                                                       | P | Inorganic ion transport and metabolism                       |
| COG1171 | Threonine dehydratase                                                                                     | E | Amino acid transport and metabolism                          |
| COG0659 | Sulfate permease and related transporters (MFS superfamily)                                               | P | Inorganic ion transport and metabolism                       |
| COG0004 | Ammonia permease                                                                                          | P | Inorganic ion transport and metabolism                       |
| COG1324 | Uncharacterized protein involved in tolerance to divalent cations                                         | P | Inorganic ion transport and metabolism                       |
| COG0626 | Cystathionine beta-lyases/cystathionine gamma-synthases                                                   | E | Amino acid transport and metabolism                          |
| COG1832 | Predicted CoA-binding protein                                                                             | R | General function prediction only                             |
| COG1024 | Enoyl-CoA hydratase/carnithine racemase                                                                   | I | Lipid transport and metabolism                               |
| COG0002 | Acetylglutamate semialdehyde dehydrogenase                                                                | E | Amino acid transport and metabolism                          |
| COG3243 | Poly(3-hydroxyalkanoate) synthetase                                                                       | I | Lipid transport and metabolism                               |
| COG0436 | Aspartate/tyrosine/aromatic aminotransferase                                                              | E | Amino acid transport and metabolism                          |
| COG0460 | Homoserine dehydrogenase                                                                                  | E | Amino acid transport and metabolism                          |
| COG1953 | Cytosine/uracil/thiamine/allantoin permeases                                                              | F | Nucleotide transport and metabolism                          |
| COG0123 | Deacetylases, including yeast histone deacetylase and acetoin utilization protein                         | B | Chromatin structure and dynamics                             |
| COG1893 | Ketopantoate reductase                                                                                    | H | Coenzyme transport and metabolism                            |
| COG2084 | 3-hydroxyisobutyrate dehydrogenase and related beta-hydroxyacid dehydrogenases                            | I | Lipid transport and metabolism                               |
| COG1802 | Transcriptional regulators                                                                                | K | Transcription                                                |
| COG0665 | Glycine/D-amino acid oxidases (deaminating)                                                               | E | Amino acid transport and metabolism                          |
| COG3839 | ABC-type sugar transport systems, ATPase components                                                       | G | Carbohydrate transport and metabolism                        |
| COG3839 | ABC-type sugar transport systems, ATPase components                                                       | G | Carbohydrate transport and metabolism                        |
| COG0395 | ABC-type sugar transport system, permease component                                                       | G | Carbohydrate transport and metabolism                        |
| COG5477 | Predicted small integral membrane protein                                                                 | S | Function unknown                                             |
| COG1653 | ABC-type sugar transport system, periplasmic component                                                    | G | Carbohydrate transport and metabolism                        |
| COG0673 | Predicted dehydrogenases and related proteins                                                             | R | General function prediction only                             |
| COG0463 | Glycosyltransferases involved in cell wall biogenesis                                                     | M | Cell wall/membrane/envelope biogenesis                       |
| COG0388 | Predicted amidohydrolase                                                                                  | R | General function prediction only                             |
| COG3639 | ABC-type phosphate/phosphonate transport system, permease component                                       | P | Inorganic ion transport and metabolism                       |
| COG0463 | Glycosyltransferases involved in cell wall biogenesis                                                     | M | Cell wall/membrane/envelope biogenesis                       |
| COG0559 | Branched-chain amino acid ABC-type transport system, permease components                                  | E | Amino acid transport and metabolism                          |
| COG4177 | ABC-type branched-chain amino acid transport system, permease component                                   | E | Amino acid transport and metabolism                          |
| COG0411 | ABC-type branched-chain amino acid transport systems, ATPase component                                    | E | Amino acid transport and metabolism                          |
| COG0683 | ABC-type branched-chain amino acid transport systems, periplasmic component                               | E | Amino acid transport and metabolism                          |
| COG1609 | Transcriptional regulators                                                                                | K | Transcription                                                |
| COG1653 | ABC-type sugar transport system, periplasmic component                                                    | G | Carbohydrate transport and metabolism                        |
| COG1175 | ABC-type sugar transport systems, permease components                                                     | G | Carbohydrate transport and metabolism                        |
| COG0395 | ABC-type sugar transport system, permease component                                                       | G | Carbohydrate transport and metabolism                        |
| COG3839 | ABC-type sugar transport systems, ATPase components                                                       | G | Carbohydrate transport and metabolism                        |
| COG0787 | Alanine racemase                                                                                          | M | Cell wall/membrane/envelope biogenesis                       |
| COG2230 | Cyclopropane fatty acid synthase and related methyltransferases                                           | M | Cell wall/membrane/envelope biogenesis                       |
| COG0238 | Ribosomal protein S18                                                                                     | J | Translation, ribosomal structure and biogenesis              |
| COG0236 | Acyl carrier protein                                                                                      | I | Lipid transport and metabolism                               |
| COG0741 | Soluble lytic murein transglycosylase and related regulatory proteins (some contain LysM/invasin domains) | M | Cell wall/membrane/envelope biogenesis                       |
| COG1280 | Putative threonine efflux protein                                                                         | E | Amino acid transport and metabolism                          |
| COG0686 | Alanine dehydrogenase                                                                                     | E | Amino acid transport and metabolism                          |
| COG0518 | GMP synthase - Glutamine amidotransferase domain                                                          | F | Nucleotide transport and metabolism                          |
| COG1975 | Xanthine and CO dehydrogenases maturation factor, XdhC/CoxF family                                        | O | Posttranslational modification, protein turnover, chaperones |
| COG1975 | Xanthine and CO dehydrogenases maturation factor, XdhC/CoxF family                                        | O | Posttranslational modification, protein turnover, chaperones |
| COG1319 | Aerobic-type carbon monoxide dehydrogenase, middle subunit CoxM/CutM homologs                             | C | Energy production and conversion                             |
| COG2080 | Aerobic-type carbon monoxide dehydrogenase, small subunit CoxS/CutS homologs                              | C | Energy production and conversion                             |
| COG0139 | Phosphoribosyl-AMP cyclohydrolase                                                                         | E | Amino acid transport and metabolism                          |
| COG0626 | Cystathionine beta-lyases/cystathionine gamma-synthases                                                   | E | Amino acid transport and metabolism                          |
| COG4765 | Uncharacterized protein conserved in bacteria                                                             | S | Function unknown                                             |
| COG0834 | ABC-type amino acid transport/signal transduction systems, periplasmic component/domain                   | E | Amino acid transport and metabolism                          |
| COG4597 | ABC-type amino acid transport system, permease component                                                  | E | Amino acid transport and metabolism                          |
| COG0765 | ABC-type amino acid transport system, permease component                                                  | E | Amino acid transport and metabolism                          |
| COG1126 | ABC-type polar amino acid transport system, ATPase component                                              | E | Amino acid transport and metabolism                          |
| COG0079 | Histidinol-phosphate/aromatic aminotransferase and cobyrinic acid decarboxylase                           | E | Amino acid transport and metabolism                          |
| COG0623 | Enoyl-[acyl-carrier-protein] reductase (NADH)                                                             | I | Lipid transport and metabolism                               |
| COG2897 | Rhodanese-related sulfurtransferase                                                                       | P | Inorganic ion transport and metabolism                       |
| COG2872 | Predicted metal-dependent hydrolases related to alanyl-tRNA synthetase HxxxH domain                       | R | General function prediction only                             |
| COG0031 | Cysteine synthase                                                                                         | E | Amino acid transport and metabolism                          |
| COG0265 | Trypsin-like serine proteases, typically periplasmic, contain C-terminal PDZ domain                       | O | Posttranslational modification, protein turnover, chaperones |
| COG0818 | Diacylglycerol kinase                                                                                     | M | Cell wall/membrane/envelope biogenesis                       |
| COG2835 | Uncharacterized conserved protein                                                                         | S | Function unknown                                             |
| COG2518 | Protein-L-isoaspartate carboxylmethyltransferase                                                          | O | Posttranslational modification, protein turnover, chaperones |
| COG2755 | Lysophospholipase L1 and related esterases                                                                | E | Amino acid transport and metabolism                          |
| COG1434 | Uncharacterized conserved protein                                                                         | S | Function unknown                                             |
| COG1686 | D-alanyl-D-alanine carboxypeptidase                                                                       | M | Cell wall/membrane/envelope biogenesis                       |
| COG4337 | Uncharacterized protein conserved in bacteria                                                             | S | Function unknown                                             |
| COG2847 | Uncharacterized protein conserved in bacteria                                                             | S | Function unknown                                             |
| COG2957 | Peptidylarginine deiminase and related enzymes                                                            | E | Amino acid transport and metabolism                          |
| COG1177 | ABC-type spermidine/putrescine transport system, permease component II                                    | E | Amino acid transport and metabolism                          |
| COG1176 | ABC-type spermidine/putrescine transport system, permease component I                                     | E | Amino acid transport and metabolism                          |
| COG3842 | ABC-type spermidine/putrescine transport systems, ATPase components                                       | E | Amino acid transport and metabolism                          |
| COG1653 | ABC-type sugar transport system, periplasmic component                                                    | G | Carbohydrate transport and metabolism                        |
| COG1175 | ABC-type sugar transport systems, permease components                                                     | G | Carbohydrate transport and metabolism                        |
| COG0395 | ABC-type sugar transport system, permease component                                                       | G | Carbohydrate transport and metabolism                        |
| COG0687 | Spermidine/putrescine-binding periplasmic protein                                                         | E | Amino acid transport and metabolism                          |
| COG0673 | Predicted dehydrogenases and related proteins                                                             | R | General function prediction only                             |
| COG0174 | Glutamine synthetase                                                                                      | E | Amino acid transport and metabolism                          |
| COG0665 | Glycine/D-amino acid oxidases (deaminating)                                                               | E | Amino acid transport and metabolism                          |
| COG1329 | Transcriptional regulators, similar to M. xanthus CarD                                                    | K | Transcription                                                |
| COG2113 | ABC-type proline/glycine betaine transport systems, periplasmic components                                | E | Amino acid transport and metabolism                          |
| COG4176 | ABC-type proline/glycine betaine transport system, permease component                                     | E | Amino acid transport and metabolism                          |
| COG4175 | ABC-type proline/glycine betaine transport system, ATPase component                                       | E | Amino acid transport and metabolism                          |
| COG1280 | Putative threonine efflux protein                                                                         | E | Amino acid transport and metabolism                          |



|         |                                                                                                                     |   |                                                               |
|---------|---------------------------------------------------------------------------------------------------------------------|---|---------------------------------------------------------------|
| COG0314 | Molybdopterin converting factor, large subunit                                                                      | H | Coenzyme transport and metabolism                             |
| COG1763 | Molybdopterin-guanine dinucleotide biosynthesis protein                                                             | H | Coenzyme transport and metabolism                             |
| COG0322 | Nuclease subunit of the excinuclease complex                                                                        | L | Replication, recombination and repair                         |
| COG0404 | Glycine cleavage system T protein (aminomethyltransferase)                                                          | E | Amino acid transport and metabolism                           |
| COG1296 | Predicted branched-chain amino acid permease (azaleucine resistance)                                                | E | Amino acid transport and metabolism                           |
| COG3027 | Uncharacterized protein conserved in bacteria                                                                       | S | Function unknown                                              |
| COG1692 | Uncharacterized protein conserved in bacteria                                                                       | S | Function unknown                                              |
| COG0824 | Predicted thioesterase                                                                                              | R | General function prediction only                              |
| COG0811 | Biopolymer transport proteins                                                                                       | U | Intracellular trafficking, secretion, and vesicular transport |
| COG0848 | Biopolymer transport protein                                                                                        | U | Intracellular trafficking, secretion, and vesicular transport |
| COG0823 | Periplasmic component of the Tol biopolymer transport system                                                        | U | Intracellular trafficking, secretion, and vesicular transport |
| COG2885 | Outer membrane protein and related peptidoglycan-associated (lipo)proteins                                          | M | Cell wall/membrane/envelope biogenesis                        |
| COG1086 | Predicted nucleoside-diphosphate sugar epimerases                                                                   | M | Cell wall/membrane/envelope biogenesis                        |
| COG0451 | Nucleoside-diphosphate-sugar epimerases                                                                             | M | Cell wall/membrane/envelope biogenesis                        |
| COG5255 | Uncharacterized protein conserved in bacteria                                                                       | S | Function unknown                                              |
| COG0451 | Nucleoside-diphosphate-sugar epimerases                                                                             | M | Cell wall/membrane/envelope biogenesis                        |
| COG0006 | Xaa-Pro aminopeptidase                                                                                              | E | Amino acid transport and metabolism                           |
| COG0766 | UDP-N-acetylglucosamine enolpyruvyl transferase                                                                     | M | Cell wall/membrane/envelope biogenesis                        |
| COG2076 | Membrane transporters of cations and cationic drugs                                                                 | P | Inorganic ion transport and metabolism                        |
| COG1133 | ABC-type long-chain fatty acid transport system, fused permease and ATPase components                               | I | Lipid transport and metabolism                                |
| COG2802 | Uncharacterized protein, similar to the N-terminal domain of Lon protease                                           | R | General function prediction only                              |
| COG0697 | Permeases of the drug/metabolite transporter (DMT) superfamily                                                      | G | Carbohydrate transport and metabolism                         |
| COG0529 | Adenylylsulfate kinase and related kinases                                                                          | P | Inorganic ion transport and metabolism                        |
| COG4764 | Uncharacterized protein conserved in bacteria                                                                       | S | Function unknown                                              |
| COG0735 | Fe <sup>2+</sup> /Zn <sup>2+</sup> uptake regulation proteins                                                       | P | Inorganic ion transport and metabolism                        |
| COG0730 | Predicted permeases                                                                                                 | R | General function prediction only                              |
| COG4581 | Superfamily II RNA helicase                                                                                         | L | Replication, recombination and repair                         |
| COG2723 | Beta-glucosidase/6-phospho-beta-glucosidase/beta-galactosidase                                                      | G | Carbohydrate transport and metabolism                         |
| COG0673 | Predicted dehydrogenases and related proteins                                                                       | R | General function prediction only                              |
| COG1082 | Sugar phosphate isomerases/epimerases                                                                               | G | Carbohydrate transport and metabolism                         |
| COG0176 | Transaldolase                                                                                                       | G | Carbohydrate transport and metabolism                         |
| COG1218 | 3'-Phosphoadenosine 5'-phosphosulfate (PAPS) 3'-phosphatase                                                         | P | Inorganic ion transport and metabolism                        |
| COG3840 | ABC-type thiamine transport system, ATPase component                                                                | H | Coenzyme transport and metabolism                             |
| COG2271 | Sugar phosphate permease                                                                                            | G | Carbohydrate transport and metabolism                         |
| COG1280 | Putative threonine efflux protein                                                                                   | E | Amino acid transport and metabolism                           |
| COG2040 | Homocysteine/selenocysteine methylase (S-methylmethionine-dependent)                                                | E | Amino acid transport and metabolism                           |
| COG2271 | Sugar phosphate permease                                                                                            | G | Carbohydrate transport and metabolism                         |
| COG0685 | 5,10-methylenetetrahydrofolate reductase                                                                            | E | Amino acid transport and metabolism                           |
| COG1486 | Alpha-galactosidases/6-phospho-beta-glucosidases, family 4 of glycosyl hydrolases                                   | G | Carbohydrate transport and metabolism                         |
| COG0824 | Predicted thioesterase                                                                                              | R | General function prediction only                              |
| COG1357 | Uncharacterized low-complexity proteins                                                                             | S | Function unknown                                              |
| COG0735 | Fe <sup>2+</sup> /Zn <sup>2+</sup> uptake regulation proteins                                                       | P | Inorganic ion transport and metabolism                        |
| COG0169 | Shikimate 5-dehydrogenase                                                                                           | E | Amino acid transport and metabolism                           |
| COG0715 | ABC-type nitrate/sulfonate/bicarbonate transport systems, periplasmic components                                    | P | Inorganic ion transport and metabolism                        |
| COG1207 | N-acetylglucosamine-1-phosphate uridylyltransferase (contains nucleotidyltransferase and 1-patch acetyltransferase) | M | Cell wall/membrane/envelope biogenesis                        |
| COG0546 | Predicted phosphatases                                                                                              | R | General function prediction only                              |
| COG0665 | Glycine/D-amino acid oxidases (deaminating)                                                                         | E | Amino acid transport and metabolism                           |
| COG0414 | Panthothenate synthetase                                                                                            | H | Coenzyme transport and metabolism                             |
| COG1012 | NAD-dependent aldehyde dehydrogenases                                                                               | C | Energy production and conversion                              |
| COG1249 | Pyruvate/2-oxoglutarate dehydrogenase complex, dihydrolipoamide dehydrogenase (E3) component, and related           | C | Energy production and conversion                              |
| COG1488 | Nicotinic acid phosphoribosyltransferase                                                                            | H | Coenzyme transport and metabolism                             |
| COG0040 | ATP phosphoribosyltransferase                                                                                       | E | Amino acid transport and metabolism                           |
| COG2761 | Predicted dithiol-disulfide isomerase involved in polyketide biosynthesis                                           | Q | Secondary metabolites biosynthesis, transport and catabolism  |
| COG0685 | 5,10-methylenetetrahydrofolate reductase                                                                            | E | Amino acid transport and metabolism                           |
| COG1072 | Panthothenate kinase                                                                                                | H | Coenzyme transport and metabolism                             |
| COG2928 | Uncharacterized conserved protein                                                                                   | S | Function unknown                                              |
| COG2141 | Coenzyme F420-dependent N5,N10-methylene tetrahydromethanopterin reductase and related flavin-dependent             | C | Energy production and conversion                              |
| COG0599 | Uncharacterized homolog of gamma-carboxymuconolactone decarboxylase subunit                                         | S | Function unknown                                              |
| COG0537 | Diadenosine tetraphosphate (Ap4A) hydrolase and other HIT family hydrolases                                         | F | Nucleotide transport and metabolism                           |
| COG1764 | Predicted redox protein, regulator of disulfide bond formation                                                      | O | Posttranslational modification, protein turnover, chaperones  |
| COG0005 | Purine nucleoside phosphorylase                                                                                     | F | Nucleotide transport and metabolism                           |
| COG1278 | Cold shock proteins                                                                                                 | K | Transcription                                                 |
| COG3118 | Thioredoxin domain-containing protein                                                                               | O | Posttranslational modification, protein turnover, chaperones  |
| COG0108 | 3,4-dihydroxy-2-butanone 4-phosphate synthase                                                                       | H | Coenzyme transport and metabolism                             |
| COG0334 | Glutamate dehydrogenase/leucine dehydrogenase                                                                       | E | Amino acid transport and metabolism                           |
| COG0781 | Transcription termination factor                                                                                    | K | Transcription                                                 |
| COG0776 | Bacterial nucleoid DNA-binding protein                                                                              | L | Replication, recombination and repair                         |
| COG2204 | Response regulator containing CheY-like receiver, AAA-type ATPase, and DNA-binding domains                          | T | Signal transduction mechanisms                                |
| COG2895 | GTPases - Sulfate adenylate transferase subunit 1                                                                   | P | Inorganic ion transport and metabolism                        |
| COG0452 | Phosphopanthothenoylcysteine synthetase/decarboxylase                                                               | H | Coenzyme transport and metabolism                             |
| COG0834 | ABC-type amino acid transport/signal transduction systems, periplasmic component/domain                             | E | Amino acid transport and metabolism                           |
| COG1520 | FOG: WD40-like repeat                                                                                               | S | Function unknown                                              |
| COG3803 | Uncharacterized protein conserved in bacteria                                                                       | S | Function unknown                                              |
| COG0604 | NADPH:quinone reductase and related Zn-dependent oxidoreductases                                                    | C | Energy production and conversion                              |
| COG1360 | Flagellar motor protein                                                                                             | N | Cell motility                                                 |
| COG0509 | Glycine cleavage system H protein (lipoate-binding)                                                                 | E | Amino acid transport and metabolism                           |
| COG0404 | Glycine cleavage system T protein (aminomethyltransferase)                                                          | E | Amino acid transport and metabolism                           |
| COG3369 | Uncharacterized conserved protein                                                                                   | S | Function unknown                                              |
| COG2334 | Putative homoserine kinase type II (protein kinase fold)                                                            | R | General function prediction only                              |
| COG0678 | Peroxiredoxin                                                                                                       | O | Posttranslational modification, protein turnover, chaperones  |
| COG0498 | Threonine synthase                                                                                                  | E | Amino acid transport and metabolism                           |
| COG0745 | Response regulators consisting of a CheY-like receiver domain and a winged-helix DNA-binding domain                 | T | Signal transduction mechanisms                                |
| COG3346 | Uncharacterized conserved protein                                                                                   | S | Function unknown                                              |
| COG2376 | Dihydroxyacetone kinase                                                                                             | G | Carbohydrate transport and metabolism                         |
| COG0704 | Phosphate uptake regulator                                                                                          | P | Inorganic ion transport and metabolism                        |
| COG0385 | Predicted Na <sup>+</sup> -dependent transporter                                                                    | R | General function prediction only                              |

|         |                                                                                                             |   |                                                               |
|---------|-------------------------------------------------------------------------------------------------------------|---|---------------------------------------------------------------|
| COG2008 | Threonine aldolase                                                                                          | E | Amino acid transport and metabolism                           |
| COG0168 | Trk-type K <sup>+</sup> transport systems, membrane components                                              | P | Inorganic ion transport and metabolism                        |
| COG1932 | Phosphoserine aminotransferase                                                                              | H | Coenzyme transport and metabolism                             |
| COG0082 | Chorismate synthase                                                                                         | E | Amino acid transport and metabolism                           |
| COG0573 | ABC-type phosphate transport system, permease component                                                     | P | Inorganic ion transport and metabolism                        |
| COG0642 | Signal transduction histidine kinase                                                                        | T | Signal transduction mechanisms                                |
| COG0745 | Response regulators consisting of a CheY-like receiver domain and a winged-helix DNA-binding domain         | T | Signal transduction mechanisms                                |
| COG3063 | Tfp pilus assembly protein PilF                                                                             | N | Cell motility                                                 |
| COG0642 | Signal transduction histidine kinase                                                                        | T | Signal transduction mechanisms                                |
| COG1610 | Uncharacterized conserved protein                                                                           | S | Function unknown                                              |
| COG0111 | Phosphoglycerate dehydrogenase and related dehydrogenases                                                   | H | Coenzyme transport and metabolism                             |
| COG1611 | Predicted Rossmann fold nucleotide-binding protein                                                          | R | General function prediction only                              |
| COG0538 | Isocitrate dehydrogenases                                                                                   | C | Energy production and conversion                              |
| COG5352 | Uncharacterized protein conserved in bacteria                                                               | S | Function unknown                                              |
| COG2329 | Uncharacterized enzyme involved in biosynthesis of extracellular polysaccharides                            | R | General function prediction only                              |
| COG0508 | Pyruvate/2-oxoglutarate dehydrogenase complex, dihydrolipoamide acyltransferase (E2) component, and related | C | Energy production and conversion                              |
| COG1176 | ABC-type spermidine/putrescine transport system, permease component I                                       | E | Amino acid transport and metabolism                           |
| COG3794 | Plastocyanin                                                                                                | C | Energy production and conversion                              |
| COG0702 | Predicted nucleoside-diphosphate-sugar epimerases                                                           | M | Cell wall/membrane/envelope biogenesis                        |
| COG0071 | Molecular chaperone (small heat shock protein)                                                              | O | Posttranslational modification, protein turnover, chaperones  |
| COG0596 | Predicted hydrolases or acyltransferases (alpha/beta hydrolase superfamily)                                 | R | General function prediction only                              |
| COG0198 | Ribosomal protein L24                                                                                       | J | Translation, ribosomal structure and biogenesis               |
| COG0255 | Ribosomal protein L29                                                                                       | J | Translation, ribosomal structure and biogenesis               |
| COG0185 | Ribosomal protein S19                                                                                       | J | Translation, ribosomal structure and biogenesis               |
| COG0051 | Ribosomal protein S10                                                                                       | J | Translation, ribosomal structure and biogenesis               |
| COG3651 | Uncharacterized protein conserved in bacteria                                                               | S | Function unknown                                              |
| COG0222 | Ribosomal protein L7/L12                                                                                    | J | Translation, ribosomal structure and biogenesis               |
| COG0244 | Ribosomal protein L10                                                                                       | J | Translation, ribosomal structure and biogenesis               |
| COG0690 | Preprotein translocase subunit SecE                                                                         | U | Intracellular trafficking, secretion, and vesicular transport |
| COG1940 | Transcriptional regulator/sugar kinase                                                                      | K | Transcription                                                 |
| COG0241 | Histidinol phosphatase and related phosphatases                                                             | E | Amino acid transport and metabolism                           |
| COG0600 | ABC-type nitrate/sulfonate/bicarbonate transport system, permease component                                 | P | Inorganic ion transport and metabolism                        |
| COG3181 | Uncharacterized protein conserved in bacteria                                                               | S | Function unknown                                              |
| COG0600 | ABC-type nitrate/sulfonate/bicarbonate transport system, permease component                                 | P | Inorganic ion transport and metabolism                        |
| COG1696 | Predicted membrane protein involved in D-alanine export                                                     | M | Cell wall/membrane/envelope biogenesis                        |
| COG2021 | Homoserine acetyltransferase                                                                                | E | Amino acid transport and metabolism                           |
| COG1011 | Predicted hydrolase (HAD superfamily)                                                                       | R | General function prediction only                              |
| COG3572 | Gamma-glutamylcysteine synthetase                                                                           | H | Coenzyme transport and metabolism                             |
| COG1597 | Sphingosine kinase and enzymes related to eukaryotic diacylglycerol kinase                                  | I | Lipid transport and metabolism                                |
| COG2908 | Uncharacterized protein conserved in bacteria                                                               | S | Function unknown                                              |
| COG0438 | Glycosyltransferase                                                                                         | M | Cell wall/membrane/envelope biogenesis                        |
| COG1519 | 3-deoxy-D-manno-octulosonic-acid transferase                                                                | M | Cell wall/membrane/envelope biogenesis                        |
| COG1663 | Tetraacyldisaccharide-1-P 4'-kinase                                                                         | M | Cell wall/membrane/envelope biogenesis                        |
| COG1560 | Lauroyl/myristoyl acyltransferase                                                                           | M | Cell wall/membrane/envelope biogenesis                        |
| COG3761 | NADH:ubiquinone oxidoreductase 17.2 kD subunit                                                              | C | Energy production and conversion                              |
| COG0439 | Biotin carboxylase                                                                                          | I | Lipid transport and metabolism                                |
| COG0511 | Biotin carboxyl carrier protein                                                                             | I | Lipid transport and metabolism                                |
| COG0757 | 3-dehydroquinate dehydratase II                                                                             | E | Amino acid transport and metabolism                           |
| COG3842 | ABC-type spermidine/putrescine transport systems, ATPase components                                         | E | Amino acid transport and metabolism                           |
| COG0687 | Spermidine/putrescine-binding periplasmic protein                                                           | E | Amino acid transport and metabolism                           |
| COG1834 | N-Dimethylarginine dimethylaminohydrolase                                                                   | E | Amino acid transport and metabolism                           |
| COG1380 | Putative effector of murein hydrolase LrgA                                                                  | R | General function prediction only                              |
| COG1346 | Putative effector of murein hydrolase                                                                       | M | Cell wall/membrane/envelope biogenesis                        |
| COG1033 | Predicted exporters of the RND superfamily                                                                  | R | General function prediction only                              |
| COG0616 | Periplasmic serine proteases (ClpP class)                                                                   | O | Posttranslational modification, protein turnover, chaperones  |
| COG4123 | Predicted O-methyltransferase                                                                               | R | General function prediction only                              |
| COG2128 | Uncharacterized conserved protein                                                                           | S | Function unknown                                              |
| COG0277 | FAD/FMN-containing dehydrogenases                                                                           | C | Energy production and conversion                              |
| COG1076 | DnaJ-domain-containing proteins 1                                                                           | O | Posttranslational modification, protein turnover, chaperones  |
| COG0488 | ATPase components of ABC transporters with duplicated ATPase domains                                        | R | General function prediction only                              |
| COG0697 | Permeases of the drug/metabolite transporter (DMT) superfamily                                              | G | Carbohydrate transport and metabolism                         |
| COG3023 | Negative regulator of beta-lactamase expression                                                             | V | Defense mechanisms                                            |
| COG2001 | Uncharacterized protein conserved in bacteria                                                               | S | Function unknown                                              |
| COG0768 | Cell division protein FtsI/penicillin-binding protein 2                                                     | M | Cell wall/membrane/envelope biogenesis                        |
| COG0770 | UDP-N-acetylmuramyl pentapeptide synthase                                                                   | M | Cell wall/membrane/envelope biogenesis                        |
| COG0472 | UDP-N-acetylmuramyl pentapeptide phosphotransferase/UDP-N-acetylglucosamine-1-phosphate transferase         | M | Cell wall/membrane/envelope biogenesis                        |
| COG0771 | UDP-N-acetylmuramoylalanine-D-glutamate ligase                                                              | M | Cell wall/membrane/envelope biogenesis                        |
| COG0772 | Bacterial cell division membrane protein                                                                    | D | Cell cycle control, cell division, chromosome partitioning    |
| COG0773 | UDP-N-acetylmuramate-alanine ligase                                                                         | M | Cell wall/membrane/envelope biogenesis                        |
| COG1181 | D-alanine-D-alanine ligase and related ATP-grasp enzymes                                                    | M | Cell wall/membrane/envelope biogenesis                        |
| COG4974 | Site-specific recombinase XerD                                                                              | L | Replication, recombination and repair                         |
| COG0206 | Cell division GTPase                                                                                        | D | Cell cycle control, cell division, chromosome partitioning    |
| COG0774 | UDP-3-O-acyl-N-acetylglucosamine deacetylase                                                                | M | Cell wall/membrane/envelope biogenesis                        |
| COG0266 | Formamidylopyrimidine-DNA glycosylase                                                                       | L | Replication, recombination and repair                         |
| COG0497 | ATPase involved in DNA repair                                                                               | L | Replication, recombination and repair                         |
| COG4103 | Uncharacterized protein conserved in bacteria                                                               | S | Function unknown                                              |
| COG0607 | Rhodanese-related sulfurtransferase                                                                         | P | Inorganic ion transport and metabolism                        |
| COG3239 | Fatty acid desaturase                                                                                       | I | Lipid transport and metabolism                                |
| COG0859 | ADP-heptose:LPS heptosyltransferase                                                                         | M | Cell wall/membrane/envelope biogenesis                        |
| COG2520 | Predicted methyltransferase                                                                                 | R | General function prediction only                              |
| COG5285 | Protein involved in biosynthesis of mitomycin antibiotics/polyketide fumonisin                              | Q | Secondary metabolites biosynthesis, transport and catabolism  |
| COG2896 | Molybdenum cofactor biosynthesis enzyme                                                                     | H | Coenzyme transport and metabolism                             |
| COG3180 | Putative ammonia monoxygenase                                                                               | R | General function prediction only                              |
| COG1403 | Restriction endonuclease                                                                                    | V | Defense mechanisms                                            |
| COG1495 | Disulfide bond formation protein DsbB                                                                       | O | Posttranslational modification, protein turnover, chaperones  |
| COG1131 | ABC-type multidrug transport system, ATPase component                                                       | V | Defense mechanisms                                            |

|         |                                                                                                  |   |                                                               |
|---------|--------------------------------------------------------------------------------------------------|---|---------------------------------------------------------------|
| COG1052 | Lactate dehydrogenase and related dehydrogenases                                                 | C | Energy production and conversion                              |
| COG3564 | Uncharacterized protein conserved in bacteria                                                    | S | Function unknown                                              |
| COG2925 | Exonuclease I                                                                                    | L | Replication, recombination and repair                         |
| COG3474 | Cytochrome c2                                                                                    | C | Energy production and conversion                              |
| COG3807 | Uncharacterized protein conserved in bacteria                                                    | S | Function unknown                                              |
| COG0225 | Peptide methionine sulfoxide reductase                                                           | O | Posttranslational modification, protein turnover, chaperones  |
| COG1592 | Rubryerthrin                                                                                     | C | Energy production and conversion                              |
| COG3660 | Predicted nucleoside-diphosphate-sugar epimerase                                                 | M | Cell wall/membrane/envelope biogenesis                        |
| COG2259 | Predicted membrane protein                                                                       | S | Function unknown                                              |
| COG0735 | Fe2+/Zn2+ uptake regulation proteins                                                             | P | Inorganic ion transport and metabolism                        |
| COG3004 | Na+/H+ antiporter                                                                                | P | Inorganic ion transport and metabolism                        |
| COG0730 | Predicted permeases                                                                              | R | General function prediction only                              |
| COG2814 | Arabinose efflux permease                                                                        | G | Carbohydrate transport and metabolism                         |
| COG0584 | Glycerophosphoryl diester phosphodiesterase                                                      | C | Energy production and conversion                              |
| COG3181 | Uncharacterized protein conserved in bacteria                                                    | S | Function unknown                                              |
| COG0491 | Zn-dependent hydrolases, including glyoxylases                                                   | R | General function prediction only                              |
| COG1063 | Threonine dehydrogenase and related Zn-dependent dehydrogenases                                  | E | Amino acid transport and metabolism                           |
| COG0078 | Ornithine carbamoyltransferase                                                                   | E | Amino acid transport and metabolism                           |
| COG0697 | Permeases of the drug/metabolite transporter (DMT) superfamily                                   | G | Carbohydrate transport and metabolism                         |
| COG0329 | Dihydrodipicolinate synthase/N-acetylneuraminate lyase                                           | E | Amino acid transport and metabolism                           |
| COG0300 | Short-chain dehydrogenases of various substrate specificities                                    | R | General function prediction only                              |
| COG1024 | Enoyl-CoA hydratase/carnithine racemase                                                          | I | Lipid transport and metabolism                                |
| COG1804 | Predicted acyl-CoA transferases/carnitine dehydratase                                            | C | Energy production and conversion                              |
| COG2050 | Uncharacterized protein, possibly involved in aromatic compounds catabolism                      | Q | Secondary metabolites biosynthesis, transport and catabolism  |
| COG4663 | TRAP-type mannitol/chloroaromatic compound transport system, periplasmic component               | Q | Secondary metabolites biosynthesis, transport and catabolism  |
| COG4665 | TRAP-type mannitol/chloroaromatic compound transport system, small permease component            | Q | Secondary metabolites biosynthesis, transport and catabolism  |
| COG0438 | Glycosyltransferase                                                                              | M | Cell wall/membrane/envelope biogenesis                        |
| COG0647 | Predicted sugar phosphatases of the HAD superfamily                                              | G | Carbohydrate transport and metabolism                         |
| COG1181 | D-alanine-D-alanine ligase and related ATP-grasp enzymes                                         | M | Cell wall/membrane/envelope biogenesis                        |
| COG3502 | Uncharacterized protein conserved in bacteria                                                    | S | Function unknown                                              |
| COG0730 | Predicted permeases                                                                              | R | General function prediction only                              |
| COG0596 | Predicted hydrolases or acyltransferases (alpha/beta hydrolase superfamily)                      | R | General function prediction only                              |
| COG0596 | Predicted hydrolases or acyltransferases (alpha/beta hydrolase superfamily)                      | R | General function prediction only                              |
| COG1765 | Predicted redox protein, regulator of disulfide bond formation                                   | O | Posttranslational modification, protein turnover, chaperones  |
| COG1653 | ABC-type sugar transport system, periplasmic component                                           | G | Carbohydrate transport and metabolism                         |
| COG0395 | ABC-type sugar transport system, permease component                                              | G | Carbohydrate transport and metabolism                         |
| COG3839 | ABC-type sugar transport systems, ATPase components                                              | G | Carbohydrate transport and metabolism                         |
| COG3839 | ABC-type sugar transport systems, ATPase components                                              | G | Carbohydrate transport and metabolism                         |
| COG0111 | Phosphoglycerate dehydrogenase and related dehydrogenases                                        | H | Coenzyme transport and metabolism                             |
| COG0115 | Branched-chain amino acid aminotransferase/4-amino-4-deoxychorismate lyase                       | E | Amino acid transport and metabolism                           |
| COG2009 | Succinate dehydrogenase/fumarate reductase, cytochrome b subunit                                 | C | Energy production and conversion                              |
| COG2076 | Membrane transporters of cations and cationic drugs                                              | P | Inorganic ion transport and metabolism                        |
| COG1485 | Predicted ATPase                                                                                 | R | General function prediction only                              |
| COG2240 | Pyridoxal/pyridoxine/pyridoxamine kinase                                                         | H | Coenzyme transport and metabolism                             |
| COG2301 | Citrate lyase beta subunit                                                                       | G | Carbohydrate transport and metabolism                         |
| COG0473 | Isocitrate/isopropylmalate dehydrogenase                                                         | C | Energy production and conversion                              |
| COG0066 | 3-isopropylmalate dehydratase small subunit                                                      | E | Amino acid transport and metabolism                           |
| COG0253 | Diaminopimelate epimerase                                                                        | E | Amino acid transport and metabolism                           |
| COG1702 | Phosphate starvation-inducible protein PhoH, predicted ATPase                                    | T | Signal transduction mechanisms                                |
| COG2917 | Intracellular septation protein A                                                                | D | Cell cycle control, cell division, chromosome partitioning    |
| COG0726 | Predicted xylanase/chitin deacetylase                                                            | G | Carbohydrate transport and metabolism                         |
| COG0277 | FAD/FMN-containing dehydrogenases                                                                | C | Energy production and conversion                              |
| COG0463 | Glycosyltransferases involved in cell wall biogenesis                                            | M | Cell wall/membrane/envelope biogenesis                        |
| COG0513 | Superfamily II DNA and RNA helicases                                                             | L | Replication, recombination and repair                         |
| COG3176 | Putative hemolysin                                                                               | R | General function prediction only                              |
| COG3565 | Predicted dioxygenase of extradiol dioxygenase family                                            | R | General function prediction only                              |
| COG0627 | Predicted esterase                                                                               | R | General function prediction only                              |
| COG0183 | Acetyl-CoA acetyltransferase                                                                     | I | Lipid transport and metabolism                                |
| COG1250 | 3-hydroxyacyl-CoA dehydrogenase                                                                  | I | Lipid transport and metabolism                                |
| COG3476 | Tryptophan-rich sensory protein (mitochondrial benzodiazepine receptor homolog)                  | T | Signal transduction mechanisms                                |
| COG1826 | Sec-independent protein secretion pathway components                                             | U | Intracellular trafficking, secretion, and vesicular transport |
| COG1840 | ABC-type Fe3+ transport system, periplasmic component                                            | P | Inorganic ion transport and metabolism                        |
| COG1414 | Transcriptional regulator                                                                        | K | Transcription                                                 |
| COG1653 | ABC-type sugar transport system, periplasmic component                                           | G | Carbohydrate transport and metabolism                         |
| COG0697 | Permeases of the drug/metabolite transporter (DMT) superfamily                                   | G | Carbohydrate transport and metabolism                         |
| COG0456 | Acetyltransferases                                                                               | R | General function prediction only                              |
| COG1807 | 4-amino-4-deoxy-L-arabinose transferase and related glycosyltransferases of PMT family           | M | Cell wall/membrane/envelope biogenesis                        |
| COG0707 | UDP-N-acetylglucosamine:LPS N-acetylglucosamine transferase                                      | M | Cell wall/membrane/envelope biogenesis                        |
| COG0726 | Predicted xylanase/chitin deacetylase                                                            | G | Carbohydrate transport and metabolism                         |
| COG0697 | Permeases of the drug/metabolite transporter (DMT) superfamily                                   | G | Carbohydrate transport and metabolism                         |
| COG4638 | Phenylpropionate dioxygenase and related ring-hydroxylating dioxygenases, large terminal subunit | P | Inorganic ion transport and metabolism                        |
| COG0589 | Universal stress protein UspA and related nucleotide-binding proteins                            | T | Signal transduction mechanisms                                |
| COG1562 | Phytoene/squalene synthetase                                                                     | I | Lipid transport and metabolism                                |
| COG0451 | Nucleoside-diphosphate-sugar epimerases                                                          | M | Cell wall/membrane/envelope biogenesis                        |
| COG0524 | Sugar kinases, ribokinase family                                                                 | G | Carbohydrate transport and metabolism                         |
| COG0697 | Permeases of the drug/metabolite transporter (DMT) superfamily                                   | G | Carbohydrate transport and metabolism                         |
| COG2086 | Electron transfer flavoprotein, beta subunit                                                     | C | Energy production and conversion                              |
| COG1391 | Glutamine synthetase adenyltransferase                                                           | O | Posttranslational modification, protein turnover, chaperones  |
| COG5490 | Uncharacterized conserved protein                                                                | S | Function unknown                                              |
| COG2962 | Predicted permeases                                                                              | R | General function prediction only                              |
| COG3492 | Uncharacterized protein conserved in bacteria                                                    | S | Function unknown                                              |
| COG0473 | Isocitrate/isopropylmalate dehydrogenase                                                         | C | Energy production and conversion                              |
| COG1012 | NAD-dependent aldehyde dehydrogenases                                                            | C | Energy production and conversion                              |
| COG0289 | Dihydrodipicolinate reductase                                                                    | E | Amino acid transport and metabolism                           |
| COG0765 | ABC-type amino acid transport system, permease component                                         | E | Amino acid transport and metabolism                           |
| COG0803 | ABC-type metal ion transport system, periplasmic component/surface adhesion                      | P | Inorganic ion transport and metabolism                        |

|         |                                                                                                                   |   |                                                            |
|---------|-------------------------------------------------------------------------------------------------------------------|---|------------------------------------------------------------|
| COG1012 | NAD-dependent aldehyde dehydrogenases                                                                             | C | Energy production and conversion                           |
| COG1121 | ABC-type Mn/Zn transport systems, ATPase component                                                                | P | Inorganic ion transport and metabolism                     |
| COG0858 | Ribosome-binding factor A                                                                                         | J | Translation, ribosomal structure and biogenesis            |
| COG1108 | ABC-type Mn2+/Zn2+ transport systems, permease components                                                         | P | Inorganic ion transport and metabolism                     |
| COG1845 | Heme/copper-type cytochrome/quinol oxidase, subunit 3                                                             | C | Energy production and conversion                           |
| COG1279 | Lysine efflux permease                                                                                            | R | General function prediction only                           |
| COG0451 | Nucleoside-diphosphate-sugar epimerases                                                                           | M | Cell wall/membrane/envelope biogenesis                     |
| COG3063 | Tfp pilus assembly protein PilF                                                                                   | N | Cell motility                                              |
| COG0859 | ADP-heptose:LPS heptosyltransferase                                                                               | M | Cell wall/membrane/envelope biogenesis                     |
| COG0367 | Asparagine synthase (glutamine-hydrolyzing)                                                                       | E | Amino acid transport and metabolism                        |
| COG0044 | Dihydroorotase and related cyclic amidohydrolases                                                                 | F | Nucleotide transport and metabolism                        |
| COG1053 | Succinate dehydrogenase/fumarate reductase, flavoprotein subunit                                                  | C | Energy production and conversion                           |
| COG2271 | Sugar phosphate permease                                                                                          | G | Carbohydrate transport and metabolism                      |
| COG1044 | UDP-3-O-[3-hydroxymyristoyl] glucosamine N-acyltransferase                                                        | M | Cell wall/membrane/envelope biogenesis                     |
| COG2072 | Predicted flavoprotein involved in K+ transport                                                                   | P | Inorganic ion transport and metabolism                     |
| COG2840 | Uncharacterized protein conserved in bacteria                                                                     | S | Function unknown                                           |
| COG0654 | 2-polypropenyl-6-methoxyphenol hydroxylase and related FAD-dependent oxidoreductases                              | H | Coenzyme transport and metabolism                          |
| COG1638 | TRAP-type C4-dicarboxylate transport system, periplasmic component                                                | G | Carbohydrate transport and metabolism                      |
| COG2271 | Sugar phosphate permease                                                                                          | G | Carbohydrate transport and metabolism                      |
| COG0463 | Glycosyltransferases involved in cell wall biogenesis                                                             | M | Cell wall/membrane/envelope biogenesis                     |
| COG1894 | NADH:ubiquinone oxidoreductase, NADH-binding (51 kD) subunit                                                      | C | Energy production and conversion                           |
| COG2259 | Predicted membrane protein                                                                                        | S | Function unknown                                           |
| COG0673 | Predicted dehydrogenases and related proteins                                                                     | R | General function prediction only                           |
| COG4454 | Uncharacterized copper-binding protein                                                                            | P | Inorganic ion transport and metabolism                     |
| COG0131 | Imidazoleglycerol-phosphate dehydratase                                                                           | E | Amino acid transport and metabolism                        |
| COG0503 | Adenine/guanine phosphoribosyltransferases and related PRPP-binding proteins                                      | F | Nucleotide transport and metabolism                        |
| COG0118 | Glutamine amidotransferase                                                                                        | E | Amino acid transport and metabolism                        |
| COG1480 | Predicted membrane-associated HD superfamily hydrolase                                                            | R | General function prediction only                           |
| COG0106 | Phosphoribosylformimino-5-aminoimidazole carboxamide ribonucleotide (ProFAR) isomerase                            | E | Amino acid transport and metabolism                        |
| COG1496 | Uncharacterized conserved protein                                                                                 | S | Function unknown                                           |
| COG0451 | Nucleoside-diphosphate-sugar epimerases                                                                           | M | Cell wall/membrane/envelope biogenesis                     |
| COG0107 | Imidazoleglycerol-phosphate synthase                                                                              | E | Amino acid transport and metabolism                        |
| COG2226 | Methylase involved in ubiquinone/menaquinone biosynthesis                                                         | H | Coenzyme transport and metabolism                          |
| COG2021 | Homoserine acetyltransferase                                                                                      | E | Amino acid transport and metabolism                        |
| COG0287 | Prephenate dehydrogenase                                                                                          | E | Amino acid transport and metabolism                        |
| COG0140 | Phosphoribosyl-ATP pyrophosphohydrolase                                                                           | G | Carbohydrate transport and metabolism                      |
| COG1653 | ABC-type sugar transport system, periplasmic component                                                            | G | Carbohydrate transport and metabolism                      |
| COG1175 | ABC-type sugar transport systems, permease components                                                             | G | Carbohydrate transport and metabolism                      |
| COG0395 | ABC-type sugar transport system, permease component                                                               | G | Carbohydrate transport and metabolism                      |
| COG3839 | ABC-type sugar transport systems, ATPase components                                                               | G | Carbohydrate transport and metabolism                      |
| COG1593 | TRAP-type C4-dicarboxylate transport system, large permease component                                             | G | Carbohydrate transport and metabolism                      |
| COG0683 | ABC-type branched-chain amino acid transport systems, periplasmic component                                       | E | Amino acid transport and metabolism                        |
| COG4177 | ABC-type branched-chain amino acid transport system, permease component                                           | E | Amino acid transport and metabolism                        |
| COG1070 | Sugar (pentulose and hexulose) kinases                                                                            | G | Carbohydrate transport and metabolism                      |
| COG3030 | Protein affecting phage T7 exclusion by the F plasmid                                                             | R | General function prediction only                           |
| COG1172 | Ribose/xylose/arabinose/galactoside ABC-type transport systems, permease components                               | G | Carbohydrate transport and metabolism                      |
| COG1089 | GDP-D-mannose dehydratase                                                                                         | M | Cell wall/membrane/envelope biogenesis                     |
| COG1089 | GDP-D-mannose dehydratase                                                                                         | M | Cell wall/membrane/envelope biogenesis                     |
| COG1573 | Uracil-DNA glycosylase                                                                                            | L | Replication, recombination and repair                      |
| COG1758 | DNA-directed RNA polymerase, subunit K/omega                                                                      | K | Transcription                                              |
| COG0317 | Guanosine polyphosphate pyrophosphohydrolases/synthetases                                                         | T | Signal transduction mechanisms                             |
| COG0119 | Isopropylmalate/homocitrate/citramalate synthases                                                                 | E | Amino acid transport and metabolism                        |
| COG0174 | Glutamine synthetase                                                                                              | E | Amino acid transport and metabolism                        |
| COG0836 | Mannose-1-phosphate guanylyltransferase                                                                           | M | Cell wall/membrane/envelope biogenesis                     |
| COG0398 | Uncharacterized conserved protein                                                                                 | S | Function unknown                                           |
| COG1208 | Nucleoside-diphosphate-sugar pyrophosphorylase involved in lipopolysaccharide biosynthesis/translation initiation | M | Cell wall/membrane/envelope biogenesis                     |
| COG0451 | Nucleoside-diphosphate-sugar epimerases                                                                           | M | Cell wall/membrane/envelope biogenesis                     |
| COG2270 | Permeases of the major facilitator superfamily                                                                    | R | General function prediction only                           |
| COG2226 | Methylase involved in ubiquinone/menaquinone biosynthesis                                                         | H | Coenzyme transport and metabolism                          |
| COG1091 | dTDP-4-dehydrorhamnose reductase                                                                                  | M | Cell wall/membrane/envelope biogenesis                     |
| COG1898 | dTDP-4-dehydrorhamnose 3,5-epimerase and related enzymes                                                          | M | Cell wall/membrane/envelope biogenesis                     |
| COG1209 | dTDP-glucose pyrophosphorylase                                                                                    | M | Cell wall/membrane/envelope biogenesis                     |
| COG0451 | Nucleoside-diphosphate-sugar epimerases                                                                           | M | Cell wall/membrane/envelope biogenesis                     |
| COG2603 | Predicted ATPase                                                                                                  | R | General function prediction only                           |
| COG0424 | Nucleotide-binding protein implicated in inhibition of septum formation                                           | D | Cell cycle control, cell division, chromosome partitioning |
| COG0415 | Deoxyribodipyrimidine photolyase                                                                                  | L | Replication, recombination and repair                      |
| COG2079 | Uncharacterized protein involved in propionate catabolism                                                         | R | General function prediction only                           |
| COG0372 | Citrate synthase                                                                                                  | C | Energy production and conversion                           |
| COG2513 | PEP phosphonotase and related enzymes                                                                             | G | Carbohydrate transport and metabolism                      |
| COG2084 | 3-hydroxyisobutyrate dehydrogenase and related beta-hydroxyacid dehydrogenases                                    | I | Lipid transport and metabolism                             |
| COG0169 | Shikimate 5-dehydrogenase                                                                                         | E | Amino acid transport and metabolism                        |
| COG2121 | Uncharacterized protein conserved in bacteria                                                                     | S | Function unknown                                           |
| COG0583 | Transcriptional regulator                                                                                         | K | Transcription                                              |
| COG0772 | Bacterial cell division membrane protein                                                                          | D | Cell cycle control, cell division, chromosome partitioning |
| COG0350 | Methylated DNA-protein cysteine methyltransferase                                                                 | L | Replication, recombination and repair                      |
| COG1830 | DhnA-type fructose-1,6-bisphosphate aldolase and related enzymes                                                  | G | Carbohydrate transport and metabolism                      |
| COG3839 | ABC-type sugar transport systems, ATPase components                                                               | G | Carbohydrate transport and metabolism                      |
| COG0486 | Predicted GTPase                                                                                                  | R | General function prediction only                           |
| COG3959 | Transketolase, N-terminal subunit                                                                                 | G | Carbohydrate transport and metabolism                      |
| COG3958 | Transketolase, C-terminal subunit                                                                                 | G | Carbohydrate transport and metabolism                      |
| COG1968 | Uncharacterized bacitracin resistance protein                                                                     | V | Defense mechanisms                                         |
| COG2166 | SufE protein probably involved in Fe-S center assembly                                                            | R | General function prediction only                           |
| COG0357 | Predicted S-adenosylmethionine-dependent methyltransferase involved in bacterial cell division                    | M | Cell wall/membrane/envelope biogenesis                     |
| COG0697 | Permeases of the drug/metabolite transporter (DMT) superfamily                                                    | G | Carbohydrate transport and metabolism                      |
| COG1192 | ATPases involved in chromosome partitioning                                                                       | D | Cell cycle control, cell division, chromosome partitioning |
| COG1682 | ABC-type polysaccharide/polyol phosphate export systems, permease component                                       | G | Carbohydrate transport and metabolism                      |

|         |                                                                                                              |   |                                                               |
|---------|--------------------------------------------------------------------------------------------------------------|---|---------------------------------------------------------------|
| COG1134 | ABC-type polysaccharide/polyol phosphate transport system, ATPase component                                  | G | Carbohydrate transport and metabolism                         |
| COG0019 | Diaminopimelate decarboxylase                                                                                | E | Amino acid transport and metabolism                           |
| COG0165 | Argininosuccinate lyase                                                                                      | E | Amino acid transport and metabolism                           |
| COG0665 | Glycine/D-amino acid oxidases (deaminating)                                                                  | E | Amino acid transport and metabolism                           |
| COG1466 | DNA polymerase III, delta subunit                                                                            | L | Replication, recombination and repair                         |
| COG3748 | Predicted membrane protein                                                                                   | S | Function unknown                                              |
| COG0123 | Deacetylases, including yeast histone deacetylase and acetoin utilization protein                            | B | Chromatin structure and dynamics                              |
| COG0191 | Fructose/tagatose bisphosphate aldolase                                                                      | G | Carbohydrate transport and metabolism                         |
| COG0464 | ATPases of the AAA+ class                                                                                    | O | Posttranslational modification, protein turnover, chaperones  |
| COG0715 | ABC-type nitrate/sulfonate/bicarbonate transport systems, periplasmic components                             | P | Inorganic ion transport and metabolism                        |
| COG1794 | Aspartate racemase                                                                                           | M | Cell wall/membrane/envelope biogenesis                        |
| COG0583 | Transcriptional regulator                                                                                    | K | Transcription                                                 |
| COG0225 | Peptide methionine sulfoxide reductase                                                                       | O | Posttranslational modification, protein turnover, chaperones  |
| COG0381 | UDP-N-acetylglucosamine 2-epimerase                                                                          | M | Cell wall/membrane/envelope biogenesis                        |
| COG1846 | Transcriptional regulators                                                                                   | K | Transcription                                                 |
| COG0745 | Response regulators consisting of a CheY-like receiver domain and a winged-helix DNA-binding domain          | T | Signal transduction mechanisms                                |
| COG0642 | Signal transduction histidine kinase                                                                         | T | Signal transduction mechanisms                                |
| COG0325 | Predicted enzyme with a TIM-barrel fold                                                                      | R | General function prediction only                              |
| COG3786 | Uncharacterized protein conserved in bacteria                                                                | S | Function unknown                                              |
| COG0721 | Asp-tRNAAsn/Glu-tRNA <sup>Gln</sup> amidotransferase C subunit                                               | J | Translation, ribosomal structure and biogenesis               |
| COG1459 | Type II secretory pathway, component PulF                                                                    | N | Cell motility                                                 |
| COG2804 | Type II secretory pathway, ATPase PulE/Tfp pilus assembly pathway, ATPase PilB                               | N | Cell motility                                                 |
| COG1989 | Type II secretory pathway, prepilin signal peptidase PulO and related peptidases                             | N | Cell motility                                                 |
| COG5360 | Uncharacterized protein conserved in bacteria                                                                | S | Function unknown                                              |
| COG1521 | Putative transcriptional regulator, homolog of Bvg accessory factor                                          | K | Transcription                                                 |
| COG1472 | Beta-glucosidase-related glycosidases                                                                        | G | Carbohydrate transport and metabolism                         |
| COG1354 | Uncharacterized conserved protein                                                                            | S | Function unknown                                              |
| COG1386 | Predicted transcriptional regulator containing the HTH domain                                                | K | Transcription                                                 |
| COG0491 | Zn-dependent hydrolases, including glyoxylases                                                               | R | General function prediction only                              |
| COG2391 | Predicted transporter component                                                                              | R | General function prediction only                              |
| COG2391 | Predicted transporter component                                                                              | R | General function prediction only                              |
| COG1012 | NAD-dependent aldehyde dehydrogenases                                                                        | C | Energy production and conversion                              |
| COG2303 | Choline dehydrogenase and related flavoproteins                                                              | E | Amino acid transport and metabolism                           |
| COG0665 | Glycine/D-amino acid oxidases (deaminating)                                                                  | E | Amino acid transport and metabolism                           |
| COG4311 | Sarcosine oxidase delta subunit                                                                              | E | Amino acid transport and metabolism                           |
| COG0404 | Glycine cleavage system T protein (aminomethyltransferase)                                                   | E | Amino acid transport and metabolism                           |
| COG4638 | Phenylpropionate dioxygenase and related ring-hydroxylating dioxygenases, large terminal subunit             | P | Inorganic ion transport and metabolism                        |
| COG0527 | Aspartokinases                                                                                               | E | Amino acid transport and metabolism                           |
| COG0444 | ABC-type dipeptide/oligopeptide/nickel transport system, ATPase component                                    | E | Amino acid transport and metabolism                           |
| COG0345 | Pyrrrole-5-carboxylate reductase                                                                             | E | Amino acid transport and metabolism                           |
| COG1109 | Phosphomannomutase                                                                                           | G | Carbohydrate transport and metabolism                         |
| COG1210 | UDP-glucose pyrophosphorylase                                                                                | M | Cell wall/membrane/envelope biogenesis                        |
| COG2017 | Galactose mutarotase and related enzymes                                                                     | G | Carbohydrate transport and metabolism                         |
| COG0399 | Predicted pyridoxal phosphate-dependent enzyme apparently involved in regulation of cell wall biogenesis     | M | Cell wall/membrane/envelope biogenesis                        |
| COG0644 | Dehydrogenases (flavoproteins)                                                                               | C | Energy production and conversion                              |
| COG0741 | Soluble lytic murein transglycosylase and related regulatory proteins (some contain LysM/invasin domains)    | M | Cell wall/membrane/envelope biogenesis                        |
| COG0673 | Predicted dehydrogenases and related proteins                                                                | R | General function prediction only                              |
| COG1280 | Putative threonine efflux protein                                                                            | E | Amino acid transport and metabolism                           |
| COG2370 | Hydrogenase/urease accessory protein                                                                         | O | Posttranslational modification, protein turnover, chaperones  |
| COG5266 | ABC-type Co <sub>2</sub> <sup>+</sup> transport system, periplasmic component                                | P | Inorganic ion transport and metabolism                        |
| COG5285 | Protein involved in biosynthesis of mitomycin antibiotics/polyketide funonisin                               | Q | Secondary metabolites biosynthesis, transport and catabolism  |
| COG0679 | Predicted permeases                                                                                          | R | General function prediction only                              |
| COG4392 | Predicted membrane protein                                                                                   | S | Function unknown                                              |
| COG0179 | 2-keto-4-pentenoate hydratase/2-oxohepta-3-ene-1,7-dioic acid hydratase (catechol pathway)                   | Q | Secondary metabolites biosynthesis, transport and catabolism  |
| COG2351 | Transthyretin-like protein                                                                                   | R | General function prediction only                              |
| COG0624 | Acetylornithine deacetylase/Succinyl-diaminopimelate desuccinylase and related deacylases                    | E | Amino acid transport and metabolism                           |
| COG0624 | Acetylornithine deacetylase/Succinyl-diaminopimelate desuccinylase and related deacylases                    | E | Amino acid transport and metabolism                           |
| COG2071 | Predicted glutamine amidotransferases                                                                        | R | General function prediction only                              |
| COG1862 | Preprotein translocase subunit YajC                                                                          | U | Intracellular trafficking, secretion, and vesicular transport |
| COG2607 | Predicted ATPase (AAA+ superfamily)                                                                          | R | General function prediction only                              |
| COG1722 | Exonuclease VII small subunit                                                                                | L | Replication, recombination and repair                         |
| COG0425 | Predicted redox protein, regulator of disulfide bond formation                                               | O | Posttranslational modification, protein turnover, chaperones  |
| COG0141 | Histidinol dehydrogenase                                                                                     | E | Amino acid transport and metabolism                           |
| COG3718 | Uncharacterized enzyme involved in inositol metabolism                                                       | G | Carbohydrate transport and metabolism                         |
| COG0524 | Sugar kinases, ribokinase family                                                                             | G | Carbohydrate transport and metabolism                         |
| COG1280 | Putative threonine efflux protein                                                                            | E | Amino acid transport and metabolism                           |
| COG2084 | 3-hydroxyisobutyrate dehydrogenase and related beta-hydroxyacid dehydrogenases                               | I | Lipid transport and metabolism                                |
| COG0006 | Xaa-Pro aminopeptidase                                                                                       | E | Amino acid transport and metabolism                           |
| COG3473 | Maleate cis-trans isomerase                                                                                  | Q | Secondary metabolites biosynthesis, transport and catabolism  |
| COG0415 | Deoxyribodipyrimidine photolyase                                                                             | L | Replication, recombination and repair                         |
| COG2828 | Uncharacterized protein conserved in bacteria                                                                | S | Function unknown                                              |
| COG2079 | Uncharacterized protein involved in propionate catabolism                                                    | R | General function prediction only                              |
| COG0473 | Isocitrate/isopropylmalate dehydrogenase                                                                     | C | Energy production and conversion                              |
| COG5285 | Protein involved in biosynthesis of mitomycin antibiotics/polyketide funonisin                               | Q | Secondary metabolites biosynthesis, transport and catabolism  |
| COG1322 | Uncharacterized protein conserved in bacteria                                                                | S | Function unknown                                              |
| COG4177 | ABC-type branched-chain amino acid transport system, permease component                                      | E | Amino acid transport and metabolism                           |
| COG3307 | Lipid A core - O-antigen ligase and related enzymes                                                          | M | Cell wall/membrane/envelope biogenesis                        |
| COG0404 | Glycine cleavage system T protein (aminomethyltransferase)                                                   | E | Amino acid transport and metabolism                           |
| COG1741 | Pirin-related protein                                                                                        | R | General function prediction only                              |
| COG2226 | Methylase involved in ubiquinone/menaquinone biosynthesis                                                    | H | Coenzyme transport and metabolism                             |
| COG0400 | Predicted esterase                                                                                           | R | General function prediction only                              |
| COG0028 | Thiamine pyrophosphate-requiring enzymes [acetolactate synthase, pyruvate dehydrogenase (cytochrome), glyoxy | E | Amino acid transport and metabolism                           |
| COG0404 | Glycine cleavage system T protein (aminomethyltransferase)                                                   | E | Amino acid transport and metabolism                           |
| COG1530 | Ribonucleases G and E                                                                                        | J | Translation, ribosomal structure and biogenesis               |
| COG0075 | Serine-pyruvate aminotransferase/archaeal aspartate aminotransferase                                         | E | Amino acid transport and metabolism                           |
| COG2844 | UTP:GlnB (protein PilI) uridylyltransferase                                                                  | O | Posttranslational modification, protein turnover, chaperones  |

|         |                                                                                                               |   |                                                               |
|---------|---------------------------------------------------------------------------------------------------------------|---|---------------------------------------------------------------|
| COG0069 | Glutamate synthase domain 2                                                                                   | E | Amino acid transport and metabolism                           |
| COG0607 | Rhodanese-related sulfurtransferase                                                                           | P | Inorganic ion transport and metabolism                        |
| COG3822 | ABC-type sugar transport system, auxiliary component                                                          | R | General function prediction only                              |
| COG5006 | Predicted permease, DMT superfamily                                                                           | R | General function prediction only                              |
| COG1252 | NADH dehydrogenase, FAD-containing subunit                                                                    | C | Energy production and conversion                              |
| COG1028 | Dehydrogenases with different specificities (related to short-chain alcohol dehydrogenases)                   | I | Lipid transport and metabolism                                |
| COG0300 | Short-chain dehydrogenases of various substrate specificities                                                 | R | General function prediction only                              |
| COG0626 | Cystathionine beta-lyases/cystathionine gamma-synthases                                                       | E | Amino acid transport and metabolism                           |
| COG0863 | DNA modification methylase                                                                                    | L | Replication, recombination and repair                         |
| COG0558 | Phosphatidylglycerophosphate synthase                                                                         | I | Lipid transport and metabolism                                |
| COG0337 | 3-dehydroquinate synthetase                                                                                   | E | Amino acid transport and metabolism                           |
| COG1187 | 16S rRNA uridine-516 pseudouridylylate synthase and related pseudouridylylate synthases                       | J | Translation, ribosomal structure and biogenesis               |
| COG0313 | Predicted methyltransferases                                                                                  | R | General function prediction only                              |
| COG2961 | Protein involved in catabolism of external DNA                                                                | R | General function prediction only                              |
| COG1593 | TRAP-type C4-dicarboxylate transport system, large permease component                                         | G | Carbohydrate transport and metabolism                         |
| COG3090 | TRAP-type C4-dicarboxylate transport system, small permease component                                         | G | Carbohydrate transport and metabolism                         |
| COG0607 | Rhodanese-related sulfurtransferase                                                                           | P | Inorganic ion transport and metabolism                        |
| COG1194 | A/G-specific DNA glycosylase                                                                                  | L | Replication, recombination and repair                         |
| COG4391 | Uncharacterized protein conserved in bacteria                                                                 | S | Function unknown                                              |
| COG4091 | Predicted homoserine dehydrogenase                                                                            | E | Amino acid transport and metabolism                           |
| COG0300 | Short-chain dehydrogenases of various substrate specificities                                                 | R | General function prediction only                              |
| COG0127 | Xanthosine triphosphate pyrophosphatase                                                                       | F | Nucleotide transport and metabolism                           |
| COG0689 | RNase PH                                                                                                      | J | Translation, ribosomal structure and biogenesis               |
| COG1063 | Threonine dehydrogenase and related Zn-dependent dehydrogenases                                               | E | Amino acid transport and metabolism                           |
| COG4240 | Predicted kinase                                                                                              | R | General function prediction only                              |
| COG1420 | Transcriptional regulator of heat shock gene                                                                  | K | Transcription                                                 |
| COG2204 | Response regulator containing CheY-like receiver, AAA-type ATPase, and DNA-binding domains                    | T | Signal transduction mechanisms                                |
| COG2907 | Predicted NAD/FAD-binding protein                                                                             | R | General function prediction only                              |
| COG3496 | Uncharacterized conserved protein                                                                             | S | Function unknown                                              |
| COG2230 | Cyclopropane fatty acid synthase and related methyltransferases                                               | M | Cell wall/membrane/envelope biogenesis                        |
| COG2211 | Na <sup>+</sup> /melibiose symporter and related transporters                                                 | G | Carbohydrate transport and metabolism                         |
| COG2220 | Predicted Zn-dependent hydrolases of the beta-lactamase fold                                                  | R | General function prediction only                              |
| COG2148 | Sugar transferases involved in lipopolysaccharide synthesis                                                   | M | Cell wall/membrane/envelope biogenesis                        |
| COG0395 | ABC-type sugar transport system, permease component                                                           | G | Carbohydrate transport and metabolism                         |
| COG1175 | ABC-type sugar transport systems, permease components                                                         | G | Carbohydrate transport and metabolism                         |
| COG1653 | ABC-type sugar transport system, periplasmic component                                                        | G | Carbohydrate transport and metabolism                         |
| COG1070 | Sugar (pentulose and hexulose) kinases                                                                        | G | Carbohydrate transport and metabolism                         |
| COG0493 | NADPH-dependent glutamate synthase beta chain and related oxidoreductases                                     | E | Amino acid transport and metabolism                           |
| COG0794 | Predicted sugar phosphate isomerase involved in capsule formation                                             | M | Cell wall/membrane/envelope biogenesis                        |
| COG2303 | Choline dehydrogenase and related flavoproteins                                                               | E | Amino acid transport and metabolism                           |
| COG3127 | Predicted ABC-type transport system involved in lysophospholipase L1 biosynthesis, permease component         | Q | Secondary metabolites biosynthesis, transport and catabolism  |
| COG1638 | TRAP-type C4-dicarboxylate transport system, periplasmic component                                            | G | Carbohydrate transport and metabolism                         |
| COG1136 | ABC-type antimicrobial peptide transport system, ATPase component                                             | V | Defense mechanisms                                            |
| COG3791 | Uncharacterized conserved protein                                                                             | S | Function unknown                                              |
| COG2755 | Lysophospholipase L1 and related esterases                                                                    | E | Amino acid transport and metabolism                           |
| COG0859 | ADP-heptose:LPS heptosyltransferase                                                                           | M | Cell wall/membrane/envelope biogenesis                        |
| COG4547 | Cobalamin biosynthesis protein CobT (nicotinate-mono-nucleotide:5, 6-dimethylbenzimidazole phosphoribosyltran | H | Coenzyme transport and metabolism                             |
| COG0395 | ABC-type sugar transport system, permease component                                                           | G | Carbohydrate transport and metabolism                         |
| COG2095 | Multiple antibiotic transporter                                                                               | U | Intracellular trafficking, secretion, and vesicular transport |
| COG0667 | Predicted oxidoreductases (related to aryl-alcohol dehydrogenases)                                            | C | Energy production and conversion                              |
| COG0300 | Short-chain dehydrogenases of various substrate specificities                                                 | R | General function prediction only                              |
| COG3046 | Uncharacterized protein related to deoxyribodipyrimidine photolysis                                           | R | General function prediction only                              |
| COG2062 | Phosphohistidine phosphatase SixA                                                                             | T | Signal transduction mechanisms                                |
| COG1028 | Dehydrogenases with different specificities (related to short-chain alcohol dehydrogenases)                   | I | Lipid transport and metabolism                                |
| COG1012 | NAD-dependent aldehyde dehydrogenases                                                                         | C | Energy production and conversion                              |
| COG0347 | Nitrogen regulatory protein PII                                                                               | E | Amino acid transport and metabolism                           |
| COG2041 | Sulfite oxidase and related enzymes                                                                           | R | General function prediction only                              |
| COG1213 | Predicted sugar nucleotidyltransferases                                                                       | M | Cell wall/membrane/envelope biogenesis                        |
| COG1674 | DNA segregation ATPase FtsK/SpoIIIE and related proteins                                                      | D | Cell cycle control, cell division, chromosome partitioning    |
| COG2226 | Methylase involved in ubiquinone/menaquinone biosynthesis                                                     | H | Coenzyme transport and metabolism                             |
| COG0491 | Zn-dependent hydrolases, including glyoxylases                                                                | R | General function prediction only                              |
| COG4341 | Predicted HD phosphohydrolase                                                                                 | R | General function prediction only                              |
| COG1012 | NAD-dependent aldehyde dehydrogenases                                                                         | C | Energy production and conversion                              |
| COG0438 | Glycosyltransferase                                                                                           | M | Cell wall/membrane/envelope biogenesis                        |
| COG4341 | Predicted HD phosphohydrolase                                                                                 | R | General function prediction only                              |
| COG0637 | Predicted phosphatase/phosphohexomutase                                                                       | R | General function prediction only                              |
| COG3217 | Uncharacterized Fe-S protein                                                                                  | R | General function prediction only                              |
| COG0747 | ABC-type dipeptide transport system, periplasmic component                                                    | E | Amino acid transport and metabolism                           |
| COG0246 | Mannitol-1-phosphate/altronate dehydrogenases                                                                 | G | Carbohydrate transport and metabolism                         |
| COG2721 | Altronate dehydratase                                                                                         | G | Carbohydrate transport and metabolism                         |
| COG2236 | Predicted phosphoribosyltransferases                                                                          | R | General function prediction only                              |
| COG0642 | Signal transduction histidine kinase                                                                          | T | Signal transduction mechanisms                                |
| COG0745 | Response regulators consisting of a CheY-like receiver domain and a winged-helix DNA-binding domain           | T | Signal transduction mechanisms                                |
| COG1546 | Uncharacterized protein (competence- and mitomycin-induced)                                                   | R | General function prediction only                              |
| COG2947 | Uncharacterized conserved protein                                                                             | S | Function unknown                                              |
| COG0667 | Predicted oxidoreductases (related to aryl-alcohol dehydrogenases)                                            | C | Energy production and conversion                              |
| COG0179 | 2-keto-4-pentenoate hydratase/2-oxohepta-3-ene-1,7-dioic acid hydratase (catechol pathway)                    | Q | Secondary metabolites biosynthesis, transport and catabolism  |
| COG0161 | Adenosylmethionine-8-amino-7-oxononanoate aminotransferase                                                    | H | Coenzyme transport and metabolism                             |
| COG2041 | Sulfite oxidase and related enzymes                                                                           | R | General function prediction only                              |
| COG0673 | Predicted dehydrogenases and related proteins                                                                 | R | General function prediction only                              |
| COG0714 | MoxR-like ATPases                                                                                             | R | General function prediction only                              |
| COG5000 | Signal transduction histidine kinase involved in nitrogen fixation and metabolism regulation                  | T | Signal transduction mechanisms                                |
| COG2224 | Isocitrate lyase                                                                                              | C | Energy production and conversion                              |
| COG3800 | Predicted transcriptional regulator                                                                           | R | General function prediction only                              |
| COG0111 | Phosphoglycerate dehydrogenase and related dehydrogenases                                                     | H | Coenzyme transport and metabolism                             |
| COG0626 | Cystathionine beta-lyases/cystathionine gamma-synthases                                                       | E | Amino acid transport and metabolism                           |

|         |                                                                                                              |   |                                                              |
|---------|--------------------------------------------------------------------------------------------------------------|---|--------------------------------------------------------------|
| COG0444 | ABC-type dipeptide/oligopeptide/nickel transport system, ATPase component                                    | E | Amino acid transport and metabolism                          |
| COG5135 | Uncharacterized conserved protein                                                                            | S | Function unknown                                             |
| COG4583 | Sarcosine oxidase gamma subunit                                                                              | E | Amino acid transport and metabolism                          |
| COG0583 | Transcriptional regulator                                                                                    | K | Transcription                                                |
| COG1028 | Dehydrogenases with different specificities (related to short-chain alcohol dehydrogenases)                  | I | Lipid transport and metabolism                               |
| COG0028 | Thiamine pyrophosphate-requiring enzymes [acetolactate synthase, pyruvate dehydrogenase (cytochrome), glyoxy | E | Amino acid transport and metabolism                          |
| COG0411 | ABC-type branched-chain amino acid transport systems, ATPase component                                       | E | Amino acid transport and metabolism                          |
| COG0559 | Branched-chain amino acid ABC-type transport system, permease components                                     | E | Amino acid transport and metabolism                          |
| COG0620 | Methionine synthase II (cobalamin-independent)                                                               | E | Amino acid transport and metabolism                          |
| COG0129 | Dihydroxyacid dehydratase/phosphogluconate dehydratase                                                       | E | Amino acid transport and metabolism                          |
| COG1414 | Transcriptional regulator                                                                                    | K | Transcription                                                |
| COG5394 | Uncharacterized protein conserved in bacteria                                                                | S | Function unknown                                             |
| COG0183 | Acetyl-CoA acetyltransferase                                                                                 | I | Lipid transport and metabolism                               |
| COG2151 | Predicted metal-sulfur cluster biosynthetic enzyme                                                           | R | General function prediction only                             |
| COG0822 | NifU homolog involved in Fe-S cluster formation                                                              | C | Energy production and conversion                             |
| COG0719 | ABC-type transport system involved in Fe-S cluster assembly, permease component                              | O | Posttranslational modification, protein turnover, chaperones |
| COG0396 | ABC-type transport system involved in Fe-S cluster assembly, ATPase component                                | O | Posttranslational modification, protein turnover, chaperones |
| COG0719 | ABC-type transport system involved in Fe-S cluster assembly, permease component                              | O | Posttranslational modification, protein turnover, chaperones |
| COG3836 | 2,4-dihydroxyhept-2-ene-1,7-dioic acid aldolase                                                              | G | Carbohydrate transport and metabolism                        |
| COG0321 | Lipoate-protein ligase B                                                                                     | H | Coenzyme transport and metabolism                            |
| COG1129 | ABC-type sugar transport system, ATPase component                                                            | G | Carbohydrate transport and metabolism                        |
| COG1879 | ABC-type sugar transport system, periplasmic component                                                       | G | Carbohydrate transport and metabolism                        |
| COG0300 | Short-chain dehydrogenases of various substrate specificities                                                | R | General function prediction only                             |
| COG1082 | Sugar phosphate isomerases/epimerases                                                                        | G | Carbohydrate transport and metabolism                        |
| COG0111 | Phosphoglycerate dehydrogenase and related dehydrogenases                                                    | H | Coenzyme transport and metabolism                            |
| COG0673 | Predicted dehydrogenases and related proteins                                                                | R | General function prediction only                             |
| COG5267 | Uncharacterized protein conserved in bacteria                                                                | S | Function unknown                                             |
| COG4102 | Uncharacterized protein conserved in bacteria                                                                | S | Function unknown                                             |
| COG2346 | Truncated hemoglobins                                                                                        | R | General function prediction only                             |
| COG0279 | Phosphoheptose isomerase                                                                                     | G | Carbohydrate transport and metabolism                        |
| COG1028 | Dehydrogenases with different specificities (related to short-chain alcohol dehydrogenases)                  | I | Lipid transport and metabolism                               |
| COG0349 | Ribonuclease D                                                                                               | J | Translation, ribosomal structure and biogenesis              |
| COG1070 | Sugar (pentulose and hexulose) kinases                                                                       | G | Carbohydrate transport and metabolism                        |
| COG0578 | Glycerol-3-phosphate dehydrogenase                                                                           | C | Energy production and conversion                             |
| COG1012 | NAD-dependent aldehyde dehydrogenases                                                                        | C | Energy production and conversion                             |
| COG1012 | NAD-dependent aldehyde dehydrogenases                                                                        | C | Energy production and conversion                             |
| COG0174 | Glutamine synthetase                                                                                         | E | Amino acid transport and metabolism                          |
| COG2081 | Predicted flavoproteins                                                                                      | R | General function prediction only                             |
| COG2863 | Cytochrome c553                                                                                              | C | Energy production and conversion                             |
| COG0318 | Acyl-CoA synthetases (AMP-forming)/AMP-acid ligases II                                                       | I | Lipid transport and metabolism                               |
| COG1028 | Dehydrogenases with different specificities (related to short-chain alcohol dehydrogenases)                  | I | Lipid transport and metabolism                               |
| COG1539 | Dihydroneopterin aldolase                                                                                    | H | Coenzyme transport and metabolism                            |
| COG0451 | Nucleoside-diphosphate-sugar epimerases                                                                      | M | Cell wall/membrane/envelope biogenesis                       |
| COG1126 | ABC-type polar amino acid transport system, ATPase component                                                 | E | Amino acid transport and metabolism                          |
| COG0248 | Exopolyphosphatase                                                                                           | F | Nucleotide transport and metabolism                          |
| COG3090 | TRAP-type C4-dicarboxylate transport system, small permease component                                        | G | Carbohydrate transport and metabolism                        |
| COG1593 | TRAP-type C4-dicarboxylate transport system, large permease component                                        | G | Carbohydrate transport and metabolism                        |
| COG0647 | Predicted sugar phosphatases of the HAD superfamily                                                          | G | Carbohydrate transport and metabolism                        |
| COG1070 | Sugar (pentulose and hexulose) kinases                                                                       | G | Carbohydrate transport and metabolism                        |
| COG1175 | ABC-type sugar transport systems, permease components                                                        | G | Carbohydrate transport and metabolism                        |
| COG0111 | Phosphoglycerate dehydrogenase and related dehydrogenases                                                    | H | Coenzyme transport and metabolism                            |
| COG3347 | Uncharacterized conserved protein                                                                            | S | Function unknown                                             |
| COG4176 | ABC-type proline/glycine betaine transport system, permease component                                        | E | Amino acid transport and metabolism                          |
| COG2113 | ABC-type proline/glycine betaine transport systems, periplasmic components                                   | E | Amino acid transport and metabolism                          |
| COG1028 | Dehydrogenases with different specificities (related to short-chain alcohol dehydrogenases)                  | I | Lipid transport and metabolism                               |
| COG0535 | Predicted Fe-S oxidoreductases                                                                               | R | General function prediction only                             |
| COG1879 | ABC-type sugar transport system, periplasmic component                                                       | G | Carbohydrate transport and metabolism                        |
| COG1172 | Ribose/xylose/arabinose/galactoside ABC-type transport systems, permease components                          | G | Carbohydrate transport and metabolism                        |
| COG2510 | Predicted membrane protein                                                                                   | S | Function unknown                                             |
| COG1129 | ABC-type sugar transport system, ATPase component                                                            | G | Carbohydrate transport and metabolism                        |
| COG3769 | Predicted hydrolase (HAD superfamily)                                                                        | R | General function prediction only                             |
| COG2376 | Dihydroxyacetone kinase                                                                                      | G | Carbohydrate transport and metabolism                        |
| COG2376 | Dihydroxyacetone kinase                                                                                      | G | Carbohydrate transport and metabolism                        |
| COG1452 | Organic solvent tolerance protein OstA                                                                       | M | Cell wall/membrane/envelope biogenesis                       |
| COG0795 | Predicted permeases                                                                                          | R | General function prediction only                             |
| COG0795 | Predicted permeases                                                                                          | R | General function prediction only                             |
| COG1995 | Pyridoxal phosphate biosynthesis protein                                                                     | H | Coenzyme transport and metabolism                            |
| COG0122 | 3-methyladenine DNA glycosylase/8-oxoguanine DNA glycosylase                                                 | L | Replication, recombination and repair                        |
| COG3639 | ABC-type phosphate/phosphonate transport system, permease component                                          | P | Inorganic ion transport and metabolism                       |
| COG0111 | Phosphoglycerate dehydrogenase and related dehydrogenases                                                    | H | Coenzyme transport and metabolism                            |
| COG1321 | Mn-dependent transcriptional regulator                                                                       | K | Transcription                                                |
| COG1254 | Acylphosphatases                                                                                             | C | Energy production and conversion                             |
| COG0045 | Succinyl-CoA synthetase, beta subunit                                                                        | C | Energy production and conversion                             |
| COG0074 | Succinyl-CoA synthetase, alpha subunit                                                                       | C | Energy production and conversion                             |
| COG0229 | Conserved domain frequently associated with peptide methionine sulfoxide reductase                           | O | Posttranslational modification, protein turnover, chaperones |
| COG0141 | Histidinol dehydrogenase                                                                                     | E | Amino acid transport and metabolism                          |
| COG0040 | ATP phosphoribosyltransferase                                                                                | E | Amino acid transport and metabolism                          |
| COG3703 | Uncharacterized protein involved in cation transport                                                         | P | Inorganic ion transport and metabolism                       |
| COG3573 | Predicted oxidoreductase                                                                                     | R | General function prediction only                             |
| COG1175 | ABC-type sugar transport systems, permease components                                                        | G | Carbohydrate transport and metabolism                        |
| COG0015 | Adenylosuccinate lyase                                                                                       | F | Nucleotide transport and metabolism                          |
| COG0073 | EMAP domain                                                                                                  | R | General function prediction only                             |
| COG1028 | Dehydrogenases with different specificities (related to short-chain alcohol dehydrogenases)                  | I | Lipid transport and metabolism                               |
| COG1670 | Acetyltransferases, including N-acetylases of ribosomal proteins                                             | J | Translation, ribosomal structure and biogenesis              |
| COG0300 | Short-chain dehydrogenases of various substrate specificities                                                | R | General function prediction only                             |
| COG3917 | 2-hydroxychromene-2-carboxylate isomerase                                                                    | Q | Secondary metabolites biosynthesis, transport and catabolism |

|         |                                                                                                              |   |                                                              |
|---------|--------------------------------------------------------------------------------------------------------------|---|--------------------------------------------------------------|
| COG1638 | TRAP-type C4-dicarboxylate transport system, periplasmic component                                           | G | Carbohydrate transport and metabolism                        |
| COG0010 | Arginase/agmatinase/formimionoglutamate hydrolase, arginase family                                           | E | Amino acid transport and metabolism                          |
| COG3246 | Uncharacterized conserved protein                                                                            | S | Function unknown                                             |
| COG1250 | 3-hydroxyacyl-CoA dehydrogenase                                                                              | I | Lipid transport and metabolism                               |
| COG4147 | Predicted symporter                                                                                          | R | General function prediction only                             |
| COG1062 | Zn-dependent alcohol dehydrogenases, class III                                                               | C | Energy production and conversion                             |
| COG0697 | Permeases of the drug/metabolite transporter (DMT) superfamily                                               | G | Carbohydrate transport and metabolism                        |
| COG1522 | Transcriptional regulators                                                                                   | K | Transcription                                                |
| COG0022 | Pyruvate/2-oxoglutarate dehydrogenase complex, dehydrogenase (E1) component, eukaryotic type, beta subunit   | C | Energy production and conversion                             |
| COG0389 | Nucleotidyltransferase/DNA polymerase involved in DNA repair                                                 | L | Replication, recombination and repair                        |
| COG3000 | Sterol desaturase                                                                                            | I | Lipid transport and metabolism                               |
| COG0683 | ABC-type branched-chain amino acid transport systems, periplasmic component                                  | E | Amino acid transport and metabolism                          |
| COG1319 | Aerobic-type carbon monoxide dehydrogenase, middle subunit CoxM/CutM homologs                                | C | Energy production and conversion                             |
| COG4154 | Fucose dissimilation pathway protein FucU                                                                    | G | Carbohydrate transport and metabolism                        |
| COG0524 | Sugar kinases, ribokinase family                                                                             | G | Carbohydrate transport and metabolism                        |
| COG0004 | Ammonia permease                                                                                             | P | Inorganic ion transport and metabolism                       |
| COG3624 | Uncharacterized enzyme of phosphonate metabolism                                                             | P | Inorganic ion transport and metabolism                       |
| COG3625 | Uncharacterized enzyme of phosphonate metabolism                                                             | P | Inorganic ion transport and metabolism                       |
| COG3627 | Uncharacterized enzyme of phosphonate metabolism                                                             | P | Inorganic ion transport and metabolism                       |
| COG4778 | ABC-type phosphonate transport system, ATPase component                                                      | P | Inorganic ion transport and metabolism                       |
| COG3454 | Metal-dependent hydrolase involved in phosphonate metabolism                                                 | P | Inorganic ion transport and metabolism                       |
| COG2188 | Transcriptional regulators                                                                                   | K | Transcription                                                |
| COG2113 | ABC-type proline/glycine betaine transport systems, periplasmic components                                   | E | Amino acid transport and metabolism                          |
| COG4176 | ABC-type proline/glycine betaine transport system, permease component                                        | E | Amino acid transport and metabolism                          |
| COG2510 | Predicted membrane protein                                                                                   | S | Function unknown                                             |
| COG0004 | Ammonia permease                                                                                             | P | Inorganic ion transport and metabolism                       |
| COG0604 | NADPH:quinone reductase and related Zn-dependent oxidoreductases                                             | C | Energy production and conversion                             |
| COG4948 | L-alanine-DL-glutamate epimerase and related enzymes of enolase superfamily                                  | M | Cell wall/membrane/envelope biogenesis                       |
| COG0404 | Glycine cleavage system T protein (aminomethyltransferase)                                                   | E | Amino acid transport and metabolism                          |
| COG1002 | Type II restriction enzyme, methylase subunits                                                               | V | Defense mechanisms                                           |
| COG1349 | Transcriptional regulators of sugar metabolism                                                               | K | Transcription                                                |
| COG3347 | Uncharacterized conserved protein                                                                            | S | Function unknown                                             |
| COG2814 | Arabinose efflux permease                                                                                    | G | Carbohydrate transport and metabolism                        |
| COG0861 | Membrane protein TerC, possibly involved in tellurium resistance                                             | P | Inorganic ion transport and metabolism                       |
| COG0633 | Ferredoxin                                                                                                   | C | Energy production and conversion                             |
| COG3090 | TRAP-type C4-dicarboxylate transport system, small permease component                                        | G | Carbohydrate transport and metabolism                        |
| COG1593 | TRAP-type C4-dicarboxylate transport system, large permease component                                        | G | Carbohydrate transport and metabolism                        |
| COG1638 | TRAP-type C4-dicarboxylate transport system, periplasmic component                                           | G | Carbohydrate transport and metabolism                        |
| COG0730 | Predicted permeases                                                                                          | R | General function prediction only                             |
| COG0845 | Membrane-fusion protein                                                                                      | M | Cell wall/membrane/envelope biogenesis                       |
| COG2137 | Uncharacterized protein conserved in bacteria                                                                | R | General function prediction only                             |
| COG1434 | Uncharacterized conserved protein                                                                            | S | Function unknown                                             |
| COG2355 | Zn-dependent dipeptidase, microsomal dipeptidase homolog                                                     | E | Amino acid transport and metabolism                          |
| COG0559 | Branched-chain amino acid ABC-type transport system, permease components                                     | E | Amino acid transport and metabolism                          |
| COG4206 | Outer membrane cobalamin receptor protein                                                                    | H | Coenzyme transport and metabolism                            |
| COG1011 | Predicted hydrolase (HAD superfamily)                                                                        | R | General function prediction only                             |
| COG1748 | Saccharopine dehydrogenase and related proteins                                                              | E | Amino acid transport and metabolism                          |
| COG2175 | Probable taurine catabolism dioxygenase                                                                      | Q | Secondary metabolites biosynthesis, transport and catabolism |
| COG0406 | Fructose-2,6-bisphosphatase                                                                                  | G | Carbohydrate transport and metabolism                        |
| COG3090 | TRAP-type C4-dicarboxylate transport system, small permease component                                        | G | Carbohydrate transport and metabolism                        |
| COG1593 | TRAP-type C4-dicarboxylate transport system, large permease component                                        | G | Carbohydrate transport and metabolism                        |
| COG1638 | TRAP-type C4-dicarboxylate transport system, periplasmic component                                           | G | Carbohydrate transport and metabolism                        |
| COG0494 | NTP pyrophosphohydrolases including oxidative damage repair enzymes                                          | L | Replication, recombination and repair                        |
| COG1364 | N-acetylglutamate synthase (N-acetylornithine aminotransferase)                                              | E | Amino acid transport and metabolism                          |
| COG3342 | Uncharacterized conserved protein                                                                            | S | Function unknown                                             |
| COG0153 | Galactokinase                                                                                                | G | Carbohydrate transport and metabolism                        |
| COG1682 | ABC-type polysaccharide/polyol phosphate export systems, permease component                                  | G | Carbohydrate transport and metabolism                        |
| COG1573 | Uracil-DNA glycosylase                                                                                       | L | Replication, recombination and repair                        |
| COG0791 | Cell wall-associated hydrolases (invasion-associated proteins)                                               | M | Cell wall/membrane/envelope biogenesis                       |
| COG0730 | Predicted permeases                                                                                          | R | General function prediction only                             |
| COG3380 | Predicted NAD/FAD-dependent oxidoreductase                                                                   | R | General function prediction only                             |
| COG0695 | Glutaredoxin and related proteins                                                                            | O | Posttranslational modification, protein turnover, chaperones |
| COG0388 | Predicted amidohydrolase                                                                                     | R | General function prediction only                             |
| COG1132 | ABC-type multidrug transport system, ATPase and permease components                                          | V | Defense mechanisms                                           |
| COG1268 | Uncharacterized conserved protein                                                                            | R | General function prediction only                             |
| COG5319 | Uncharacterized protein conserved in bacteria                                                                | S | Function unknown                                             |
| COG0534 | Na+-driven multidrug efflux pump                                                                             | V | Defense mechanisms                                           |
| COG2141 | Coenzyme F420-dependent N5,N10-methylene tetrahydromethanopterin reductase and related flavin-dependent c    | C | Energy production and conversion                             |
| COG0110 | Acetyltransferase (isoleucine patch superfamily)                                                             | R | General function prediction only                             |
| COG0182 | Predicted translation initiation factor 2B subunit, eIF-2B alpha/beta/delta family                           | J | Translation, ribosomal structure and biogenesis              |
| COG0847 | DNA polymerase III, epsilon subunit and related 3'-5' exonucleases                                           | L | Replication, recombination and repair                        |
| COG3181 | Uncharacterized protein conserved in bacteria                                                                | S | Function unknown                                             |
| COG0028 | Thiamine pyrophosphate-requiring enzymes [acetolactate synthase, pyruvate dehydrogenase (cytochrome), glyoxy | E | Amino acid transport and metabolism                          |
| COG1804 | Predicted acyl-CoA transferases/carnitine dehydratase                                                        | C | Energy production and conversion                             |
| COG3588 | Fructose-1,6-bisphosphate aldolase                                                                           | G | Carbohydrate transport and metabolism                        |
| COG0037 | Predicted ATPase of the PP-loop superfamily implicated in cell cycle control                                 | D | Cell cycle control, cell division, chromosome partitioning   |
| COG1738 | Uncharacterized conserved protein                                                                            | S | Function unknown                                             |
| COG0436 | Aspartate/tyrosine/aromatic aminotransferase                                                                 | E | Amino acid transport and metabolism                          |
| COG1653 | ABC-type sugar transport system, periplasmic component                                                       | G | Carbohydrate transport and metabolism                        |
| COG2855 | Predicted membrane protein                                                                                   | S | Function unknown                                             |
| COG0405 | Gamma-glutamyltransferase                                                                                    | E | Amino acid transport and metabolism                          |
| COG0283 | Cytidylate kinase                                                                                            | F | Nucleotide transport and metabolism                          |
| COG0776 | Bacterial nucleoid DNA-binding protein                                                                       | L | Replication, recombination and repair                        |
| COG1802 | Transcriptional regulators                                                                                   | K | Transcription                                                |
| COG1609 | Transcriptional regulators                                                                                   | K | Transcription                                                |
| COG4608 | ABC-type oligopeptide transport system, ATPase component                                                     | E | Amino acid transport and metabolism                          |



|         |                                                                                                                   |   |                                                               |
|---------|-------------------------------------------------------------------------------------------------------------------|---|---------------------------------------------------------------|
| COG1304 | L-lactate dehydrogenase (FMN-dependent) and related alpha-hydroxy acid dehydrogenases                             | C | Energy production and conversion                              |
| COG0135 | Phosphoribosylanthranilate isomerase                                                                              | E | Amino acid transport and metabolism                           |
| COG1741 | Pirin-related protein                                                                                             | R | General function prediction only                              |
| COG2814 | Arabinose efflux permease                                                                                         | G | Carbohydrate transport and metabolism                         |
| COG0697 | Permeases of the drug/metabolite transporter (DMT) superfamily                                                    | G | Carbohydrate transport and metabolism                         |
| COG0714 | MoxR-like ATPases                                                                                                 | R | General function prediction only                              |
| COG0778 | Nitroreductase                                                                                                    | C | Energy production and conversion                              |
| COG0484 | DnaJ-class molecular chaperone with C-terminal Zn finger domain                                                   | O | Posttranslational modification, protein turnover, chaperones  |
| COG2303 | Choline dehydrogenase and related flavoproteins                                                                   | E | Amino acid transport and metabolism                           |
| COG0507 | ATP-dependent exoDNAse (exonuclease V), alpha subunit - helicase superfamily I member                             | L | Replication, recombination and repair                         |
| COG0834 | ABC-type amino acid transport/signal transduction systems, periplasmic component/domain                           | E | Amino acid transport and metabolism                           |
| COG0517 | FOG: CBS domain                                                                                                   | R | General function prediction only                              |
| COG1280 | Putative threonine efflux protein                                                                                 | E | Amino acid transport and metabolism                           |
| COG0337 | 3-dehydroquinate synthetase                                                                                       | E | Amino acid transport and metabolism                           |
| COG0703 | Shikimate kinase                                                                                                  | E | Amino acid transport and metabolism                           |
| COG1974 | SOS-response transcriptional repressors (RecA-mediated autopeptidases)                                            | K | Transcription                                                 |
| COG3639 | ABC-type phosphate/phosphonate transport system, permease component                                               | P | Inorganic ion transport and metabolism                        |
| COG3639 | ABC-type phosphate/phosphonate transport system, permease component                                               | P | Inorganic ion transport and metabolism                        |
| COG3221 | ABC-type phosphate/phosphonate transport system, periplasmic component                                            | P | Inorganic ion transport and metabolism                        |
| COG2364 | Predicted membrane protein                                                                                        | S | Function unknown                                              |
| COG3638 | ABC-type phosphate/phosphonate transport system, ATPase component                                                 | P | Inorganic ion transport and metabolism                        |
| COG0406 | Fructose-2,6-bisphosphatase                                                                                       | G | Carbohydrate transport and metabolism                         |
| COG0154 | Asp-tRNAAsn/Glu-tRNA <sup>Gln</sup> amidotransferase A subunit and related amidases                               | J | Translation, ribosomal structure and biogenesis               |
| COG0166 | Glucose-6-phosphate isomerase                                                                                     | G | Carbohydrate transport and metabolism                         |
| COG1196 | Chromosome segregation ATPases                                                                                    | D | Cell cycle control, cell division, chromosome partitioning    |
| COG3333 | Uncharacterized protein conserved in bacteria                                                                     | S | Function unknown                                              |
| COG1028 | Dehydrogenases with different specificities (related to short-chain alcohol dehydrogenases)                       | I | Lipid transport and metabolism                                |
| COG3152 | Predicted membrane protein                                                                                        | S | Function unknown                                              |
| COG0171 | NAD synthase                                                                                                      | H | Coenzyme transport and metabolism                             |
| COG0579 | Predicted dehydrogenase                                                                                           | R | General function prediction only                              |
| COG0181 | Porphobilinogen deaminase                                                                                         | H | Coenzyme transport and metabolism                             |
| COG1605 | Chorismate mutase                                                                                                 | E | Amino acid transport and metabolism                           |
| COG5000 | Signal transduction histidine kinase involved in nitrogen fixation and metabolism regulation                      | T | Signal transduction mechanisms                                |
| COG0825 | Acetyl-CoA carboxylase alpha subunit                                                                              | I | Lipid transport and metabolism                                |
| COG4968 | Tfp pilus assembly protein PIIe                                                                                   | N | Cell motility                                                 |
| COG4972 | Tfp pilus assembly protein, ATPase PilM                                                                           | N | Cell motility                                                 |
| COG2805 | Tfp pilus assembly protein, pilus retraction ATPase PilT                                                          | N | Cell motility                                                 |
| COG2813 | 16S RNA G1207 methylase RsmC                                                                                      | J | Translation, ribosomal structure and biogenesis               |
| COG5524 | Bacteriorhodopsin                                                                                                 | R | General function prediction only                              |
| COG4696 | Uncharacterized protein conserved in bacteria                                                                     | S | Function unknown                                              |
| COG0472 | UDP-N-acetylmuramyl pentapeptide phosphotransferase/UDP-N-acetylglucosamine-1-phosphate transferase               | M | Cell wall/membrane/envelope biogenesis                        |
| COG2940 | Proteins containing SET domain                                                                                    | R | General function prediction only                              |
| COG0306 | Phosphate/sulphate permeases                                                                                      | P | Inorganic ion transport and metabolism                        |
| COG1392 | Phosphate transport regulator (distant homolog of PhoU)                                                           | P | Inorganic ion transport and metabolism                        |
| COG0436 | Aspartate/tyrosine/aromatic aminotransferase                                                                      | E | Amino acid transport and metabolism                           |
| COG5010 | Flp pilus assembly protein TadD, contains TPR repeats                                                             | U | Intracellular trafficking, secretion, and vesicular transport |
| COG1666 | Uncharacterized protein conserved in bacteria                                                                     | S | Function unknown                                              |
| COG0668 | Small-conductance mechanosensitive channel                                                                        | M | Cell wall/membrane/envelope biogenesis                        |
| COG3223 | Predicted membrane protein                                                                                        | S | Function unknown                                              |
| COG0548 | Acetylglutamate kinase                                                                                            | E | Amino acid transport and metabolism                           |
| COG0646 | Methionine synthase I (cobalamin-dependent), methyltransferase domain                                             | E | Amino acid transport and metabolism                           |
| COG0218 | Predicted GTPase                                                                                                  | R | General function prediction only                              |
| COG0759 | Uncharacterized conserved protein                                                                                 | S | Function unknown                                              |
| COG3785 | Uncharacterized conserved protein                                                                                 | S | Function unknown                                              |
| COG2301 | Citrate lyase beta subunit                                                                                        | G | Carbohydrate transport and metabolism                         |
| COG0646 | Methionine synthase I (cobalamin-dependent), methyltransferase domain                                             | E | Amino acid transport and metabolism                           |
| COG0404 | Glycine cleavage system T protein (aminomethyltransferase)                                                        | E | Amino acid transport and metabolism                           |
| COG0404 | Glycine cleavage system T protein (aminomethyltransferase)                                                        | E | Amino acid transport and metabolism                           |
| COG0111 | Phosphoglycerate dehydrogenase and related dehydrogenases                                                         | H | Coenzyme transport and metabolism                             |
| COG3225 | ABC-type uncharacterized transport system involved in gliding motility, auxiliary component                       | N | Cell motility                                                 |
| COG1277 | ABC-type transport system involved in multi-copper enzyme maturation, permease component                          | R | General function prediction only                              |
| COG0617 | tRNA nucleotidyltransferase/poly(A) polymerase                                                                    | J | Translation, ribosomal structure and biogenesis               |
| COG0394 | Protein-tyrosine-phosphatase                                                                                      | T | Signal transduction mechanisms                                |
| COG3313 | Predicted Fe-S protein                                                                                            | R | General function prediction only                              |
| COG0329 | Dihydrodipicolinate synthase/N-acetylneuraminate lyase                                                            | E | Amino acid transport and metabolism                           |
| COG1176 | ABC-type spermidine/putrescine transport system, permease component I                                             | E | Amino acid transport and metabolism                           |
| COG1177 | ABC-type spermidine/putrescine transport system, permease component II                                            | E | Amino acid transport and metabolism                           |
| COG0069 | Glutamate synthase domain 2                                                                                       | E | Amino acid transport and metabolism                           |
| COG0070 | Glutamate synthase domain 3                                                                                       | E | Amino acid transport and metabolism                           |
| COG0067 | Glutamate synthase domain 1                                                                                       | E | Amino acid transport and metabolism                           |
| COG0174 | Glutamine synthetase                                                                                              | E | Amino acid transport and metabolism                           |
| COG0665 | Glycine/D-amino acid oxidases (deaminating)                                                                       | E | Amino acid transport and metabolism                           |
| COG4583 | Sarcosine oxidase gamma subunit                                                                                   | E | Amino acid transport and metabolism                           |
| COG0510 | Predicted choline kinase involved in LPS biosynthesis                                                             | M | Cell wall/membrane/envelope biogenesis                        |
| COG2212 | Multisubunit Na <sup>+</sup> /H <sup>+</sup> antiporter, MnhF subunit                                             | P | Inorganic ion transport and metabolism                        |
| COG0150 | Phosphoribosylaminoimidazole (AIR) synthetase                                                                     | F | Nucleotide transport and metabolism                           |
| COG0463 | Glycosyltransferases involved in cell wall biogenesis                                                             | M | Cell wall/membrane/envelope biogenesis                        |
| COG1216 | Predicted glycosyltransferases                                                                                    | R | General function prediction only                              |
| COG0438 | Glycosyltransferase                                                                                               | M | Cell wall/membrane/envelope biogenesis                        |
| COG0438 | Glycosyltransferase                                                                                               | M | Cell wall/membrane/envelope biogenesis                        |
| COG1208 | Nucleoside-diphosphate-sugar pyrophosphorylase involved in lipopolysaccharide biosynthesis/translation initiation | M | Cell wall/membrane/envelope biogenesis                        |
| COG0463 | Glycosyltransferases involved in cell wall biogenesis                                                             | M | Cell wall/membrane/envelope biogenesis                        |
| COG4487 | Uncharacterized protein conserved in bacteria                                                                     | S | Function unknown                                              |
| COG2072 | Predicted flavoprotein involved in K <sup>+</sup> transport                                                       | P | Inorganic ion transport and metabolism                        |
| COG0404 | Glycine cleavage system T protein (aminomethyltransferase)                                                        | E | Amino acid transport and metabolism                           |
| COG0451 | Nucleoside-diphosphate-sugar epimerases                                                                           | M | Cell wall/membrane/envelope biogenesis                        |

|         |                                                                                             |   |                                                              |
|---------|---------------------------------------------------------------------------------------------|---|--------------------------------------------------------------|
| COG0596 | Predicted hydrolases or acyltransferases (alpha/beta hydrolase superfamily)                 | R | General function prediction only                             |
| COG0451 | Nucleoside-diphosphate-sugar epimerases                                                     | M | Cell wall/membrane/envelope biogenesis                       |
| COG0397 | Uncharacterized conserved protein                                                           | S | Function unknown                                             |
| COG0677 | UDP-N-acetyl-D-mannosaminuronate dehydrogenase                                              | M | Cell wall/membrane/envelope biogenesis                       |
| COG3448 | CBS-domain-containing membrane protein                                                      | T | Signal transduction mechanisms                               |
| COG3206 | Uncharacterized protein involved in exopolysaccharide biosynthesis                          | M | Cell wall/membrane/envelope biogenesis                       |
| COG2208 | Serine phosphatase RsbU, regulator of sigma subunit                                         | T | Signal transduction mechanisms                               |
| COG1366 | Anti-anti-sigma regulatory factor (antagonist of anti-sigma factor)                         | T | Signal transduction mechanisms                               |
| COG4567 | Response regulator consisting of a CheY-like receiver domain and a Fis-type HTH domain      | T | Signal transduction mechanisms                               |
| COG4266 | Allantoicase                                                                                | F | Nucleotide transport and metabolism                          |
| COG0642 | Signal transduction histidine kinase                                                        | T | Signal transduction mechanisms                               |
| COG4311 | Sarcosine oxidase delta subunit                                                             | E | Amino acid transport and metabolism                          |
| COG1131 | ABC-type multidrug transport system, ATPase component                                       | V | Defense mechanisms                                           |
| COG0665 | Glycine/D-amino acid oxidases (deaminating)                                                 | E | Amino acid transport and metabolism                          |
| COG0069 | Glutamate synthase domain 2                                                                 | E | Amino acid transport and metabolism                          |
| COG0070 | Glutamate synthase domain 3                                                                 | E | Amino acid transport and metabolism                          |
| COG0067 | Glutamate synthase domain 1                                                                 | E | Amino acid transport and metabolism                          |
| COG1511 | Predicted membrane protein                                                                  | S | Function unknown                                             |
| COG1044 | UDP-3-O-[3-hydroxymyristoyl] glucosamine N-acyltransferase                                  | M | Cell wall/membrane/envelope biogenesis                       |
| COG0346 | Lactoylglutathione lyase and related lyases                                                 | E | Amino acid transport and metabolism                          |
| COG0484 | DnaJ-class molecular chaperone with C-terminal Zn finger domain                             | O | Posttranslational modification, protein turnover, chaperones |
| COG0624 | Acetylmornithine deacetylase/Succinyl-diaminopimelate desuccinylase and related deacylases  | E | Amino acid transport and metabolism                          |
| COG1296 | Predicted branched-chain amino acid permease (azaleucine resistance)                        | E | Amino acid transport and metabolism                          |
| COG2171 | Tetrahydrodipicolinate N-succinyltransferase                                                | E | Amino acid transport and metabolism                          |
| COG1011 | Predicted hydrolase (HAD superfamily)                                                       | R | General function prediction only                             |
| COG0730 | Predicted permeases                                                                         | R | General function prediction only                             |
| COG0179 | 2-keto-4-pentenoate hydratase/2-oxohepta-3-ene-1,7-dioic acid hydratase (catechol pathway)  | Q | Secondary metabolites biosynthesis, transport and catabolism |
| COG0042 | tRNA-dihydrouridine synthase                                                                | J | Translation, ribosomal structure and biogenesis              |
| COG1304 | L-lactate dehydrogenase (FMN-dependent) and related alpha-hydroxy acid dehydrogenases       | C | Energy production and conversion                             |
| COG0834 | ABC-type amino acid transport/signal transduction systems, periplasmic component/domain     | E | Amino acid transport and metabolism                          |
| COG1126 | ABC-type polar amino acid transport system, ATPase component                                | E | Amino acid transport and metabolism                          |
| COG1638 | TRAP-type C4-dicarboxylate transport system, periplasmic component                          | G | Carbohydrate transport and metabolism                        |
| COG5454 | Predicted secreted protein                                                                  | S | Function unknown                                             |
| COG1522 | Transcriptional regulators                                                                  | K | Transcription                                                |
| COG0065 | 3-isopropylmalate dehydratase large subunit                                                 | E | Amino acid transport and metabolism                          |
| COG0697 | Permeases of the drug/metabolite transporter (DMT) superfamily                              | G | Carbohydrate transport and metabolism                        |
| COG3791 | Uncharacterized conserved protein                                                           | S | Function unknown                                             |
| COG4663 | TRAP-type mannitol/chloroaromatic compound transport system, periplasmic component          | Q | Secondary metabolites biosynthesis, transport and catabolism |
| COG1012 | NAD-dependent aldehyde dehydrogenases                                                       | C | Energy production and conversion                             |
| COG1396 | Predicted transcriptional regulators                                                        | K | Transcription                                                |
| COG0243 | Anaerobic dehydrogenases, typically selenocysteine-containing                               | C | Energy production and conversion                             |
| COG1051 | ADP-ribose pyrophosphatase                                                                  | F | Nucleotide transport and metabolism                          |
| COG0819 | Putative transcription activator                                                            | K | Transcription                                                |
| COG3205 | Predicted membrane protein                                                                  | S | Function unknown                                             |
| COG3284 | Transcriptional activator of acetoin/glycerol metabolism                                    | Q | Secondary metabolites biosynthesis, transport and catabolism |
| COG3971 | 2-keto-4-pentenoate hydratase                                                               | Q | Secondary metabolites biosynthesis, transport and catabolism |
| COG1035 | Coenzyme F420-reducing hydrogenase, beta subunit                                            | C | Energy production and conversion                             |
| COG1173 | ABC-type dipeptide/oligopeptide/nickel transport systems, permease components               | E | Amino acid transport and metabolism                          |
| COG0601 | ABC-type dipeptide/oligopeptide/nickel transport systems, permease components               | E | Amino acid transport and metabolism                          |
| COG1898 | dTDP-4-dehydrorhamnose 3,5-epimerase and related enzymes                                    | M | Cell wall/membrane/envelope biogenesis                       |
| COG0747 | ABC-type dipeptide transport system, periplasmic component                                  | E | Amino acid transport and metabolism                          |
| COG1116 | ABC-type nitrate/sulfonate/bicarbonate transport system, ATPase component                   | P | Inorganic ion transport and metabolism                       |
| COG0665 | Glycine/D-amino acid oxidases (deaminating)                                                 | E | Amino acid transport and metabolism                          |
| COG0583 | Transcriptional regulator                                                                   | K | Transcription                                                |
| COG0665 | Glycine/D-amino acid oxidases (deaminating)                                                 | E | Amino acid transport and metabolism                          |
| COG0625 | Glutathione S-transferase                                                                   | O | Posttranslational modification, protein turnover, chaperones |
| COG2249 | Putative NADPH-quinone reductase (modulator of drug activity B)                             | R | General function prediction only                             |
| COG0365 | Acyl-coenzyme A synthetases/AMP-(fatty) acid ligases                                        | I | Lipid transport and metabolism                               |
| COG5350 | Predicted protein tyrosine phosphatase                                                      | R | General function prediction only                             |
| COG0584 | Glycerophosphoryl diester phosphodiesterase                                                 | C | Energy production and conversion                             |
| COG5395 | Predicted membrane protein                                                                  | S | Function unknown                                             |
| COG0260 | Leucyl aminopeptidase                                                                       | E | Amino acid transport and metabolism                          |
| COG0111 | Phosphoglycerate dehydrogenase and related dehydrogenases                                   | H | Coenzyme transport and metabolism                            |
| COG3908 | Uncharacterized protein conserved in bacteria                                               | S | Function unknown                                             |
| COG1177 | ABC-type spermidine/putrescine transport system, permease component II                      | E | Amino acid transport and metabolism                          |
| COG2355 | Zn-dependent dipeptidase, microsomal dipeptidase homolog                                    | E | Amino acid transport and metabolism                          |
| COG0600 | ABC-type nitrate/sulfonate/bicarbonate transport system, permease component                 | P | Inorganic ion transport and metabolism                       |
| COG0687 | Spermidine/putrescine-binding periplasmic protein                                           | E | Amino acid transport and metabolism                          |
| COG0483 | Archaeal fructose-1,6-bisphosphatase and related enzymes of inositol monophosphatase family | G | Carbohydrate transport and metabolism                        |
| COG0077 | Prephenate dehydratase                                                                      | E | Amino acid transport and metabolism                          |
| COG1593 | TRAP-type C4-dicarboxylate transport system, large permease component                       | G | Carbohydrate transport and metabolism                        |
| COG4665 | TRAP-type mannitol/chloroaromatic compound transport system, small permease component       | Q | Secondary metabolites biosynthesis, transport and catabolism |
| COG1212 | CMP-2-keto-3-deoxyoctulosonic acid synthetase                                               | M | Cell wall/membrane/envelope biogenesis                       |
| COG2967 | Uncharacterized protein affecting Mg2+/Co2+ transport                                       | P | Inorganic ion transport and metabolism                       |
| COG1012 | NAD-dependent aldehyde dehydrogenases                                                       | C | Energy production and conversion                             |
| COG0596 | Predicted hydrolases or acyltransferases (alpha/beta hydrolase superfamily)                 | R | General function prediction only                             |
| COG2258 | Uncharacterized protein conserved in bacteria                                               | S | Function unknown                                             |
| COG0316 | Uncharacterized conserved protein                                                           | S | Function unknown                                             |
| COG0355 | FOF1-type ATP synthase, epsilon subunit (mitochondrial delta subunit)                       | C | Energy production and conversion                             |
| COG1012 | NAD-dependent aldehyde dehydrogenases                                                       | C | Energy production and conversion                             |
| COG0494 | NTP pyrophosphohydrolases including oxidative damage repair enzymes                         | L | Replication, recombination and repair                        |
| COG0793 | Periplasmic protease                                                                        | M | Cell wall/membrane/envelope biogenesis                       |
| COG0785 | Cytochrome c biogenesis protein                                                             | O | Posttranslational modification, protein turnover, chaperones |
| COG0534 | Na+-driven multidrug efflux pump                                                            | V | Defense mechanisms                                           |
| COG1576 | Uncharacterized conserved protein                                                           | S | Function unknown                                             |
| COG0799 | Uncharacterized homolog of plant lojap protein                                              | S | Function unknown                                             |

|         |                                                                                             |   |                                                              |
|---------|---------------------------------------------------------------------------------------------|---|--------------------------------------------------------------|
| COG0601 | ABC-type dipeptide/oligopeptide/nickel transport systems, permease components               | E | Amino acid transport and metabolism                          |
| COG1057 | Nicotinic acid mononucleotide adenyltransferase                                             | H | Coenzyme transport and metabolism                            |
| COG0683 | ABC-type branched-chain amino acid transport systems, periplasmic component                 | E | Amino acid transport and metabolism                          |
| COG0014 | Gamma-glutamyl phosphate reductase                                                          | E | Amino acid transport and metabolism                          |
| COG0637 | Predicted phosphatase/phosphohexomutase                                                     | R | General function prediction only                             |
| COG0444 | ABC-type dipeptide/oligopeptide/nickel transport system, ATPase component                   | E | Amino acid transport and metabolism                          |
| COG0263 | Glutamate 5-kinase                                                                          | E | Amino acid transport and metabolism                          |
| COG0598 | Mg <sup>2+</sup> and Co <sup>2+</sup> transporters                                          | P | Inorganic ion transport and metabolism                       |
| COG0569 | K <sup>+</sup> transport systems, NAD-binding component                                     | P | Inorganic ion transport and metabolism                       |
| COG1211 | 4-diphosphocytidyl-2-methyl-D-erythritol synthase                                           | I | Lipid transport and metabolism                               |
| COG1216 | Predicted glycosyltransferases                                                              | R | General function prediction only                             |
| COG3705 | ATP phosphoribosyltransferase involved in histidine biosynthesis                            | E | Amino acid transport and metabolism                          |
| COG0534 | Na <sup>+</sup> -driven multidrug efflux pump                                               | V | Defense mechanisms                                           |
| COG1807 | 4-amino-4-deoxy-L-arabinose transferase and related glycosyltransferases of PMT family      | M | Cell wall/membrane/envelope biogenesis                       |
| COG1063 | Threonine dehydrogenase and related Zn-dependent dehydrogenases                             | E | Amino acid transport and metabolism                          |
| COG0834 | ABC-type amino acid transport/signal transduction systems, periplasmic component/domain     | E | Amino acid transport and metabolism                          |
| COG1638 | TRAP-type C4-dicarboxylate transport system, periplasmic component                          | G | Carbohydrate transport and metabolism                        |
| COG3090 | TRAP-type C4-dicarboxylate transport system, small permease component                       | G | Carbohydrate transport and metabolism                        |
| COG1593 | TRAP-type C4-dicarboxylate transport system, large permease component                       | G | Carbohydrate transport and metabolism                        |
| COG1028 | Dehydrogenases with different specificities (related to short-chain alcohol dehydrogenases) | I | Lipid transport and metabolism                               |
| COG0119 | Isopropylmalate/homocitrate/citramalate synthases                                           | E | Amino acid transport and metabolism                          |
| COG0565 | rRNA methylase                                                                              | J | Translation, ribosomal structure and biogenesis              |
| COG0526 | Thiol-disulfide isomerase and thioredoxins                                                  | O | Posttranslational modification, protein turnover, chaperones |
| COG0219 | Predicted rRNA methylase (SpoU class)                                                       | J | Translation, ribosomal structure and biogenesis              |
| COG1028 | Dehydrogenases with different specificities (related to short-chain alcohol dehydrogenases) | I | Lipid transport and metabolism                               |
| COG2962 | Predicted permeases                                                                         | R | General function prediction only                             |
| COG3333 | Uncharacterized protein conserved in bacteria                                               | S | Function unknown                                             |
| COG2271 | Sugar phosphate permease                                                                    | G | Carbohydrate transport and metabolism                        |
