# Supplementary material
Source: PubMed Central journal article supplement (PMC4438329)

Fig. S1

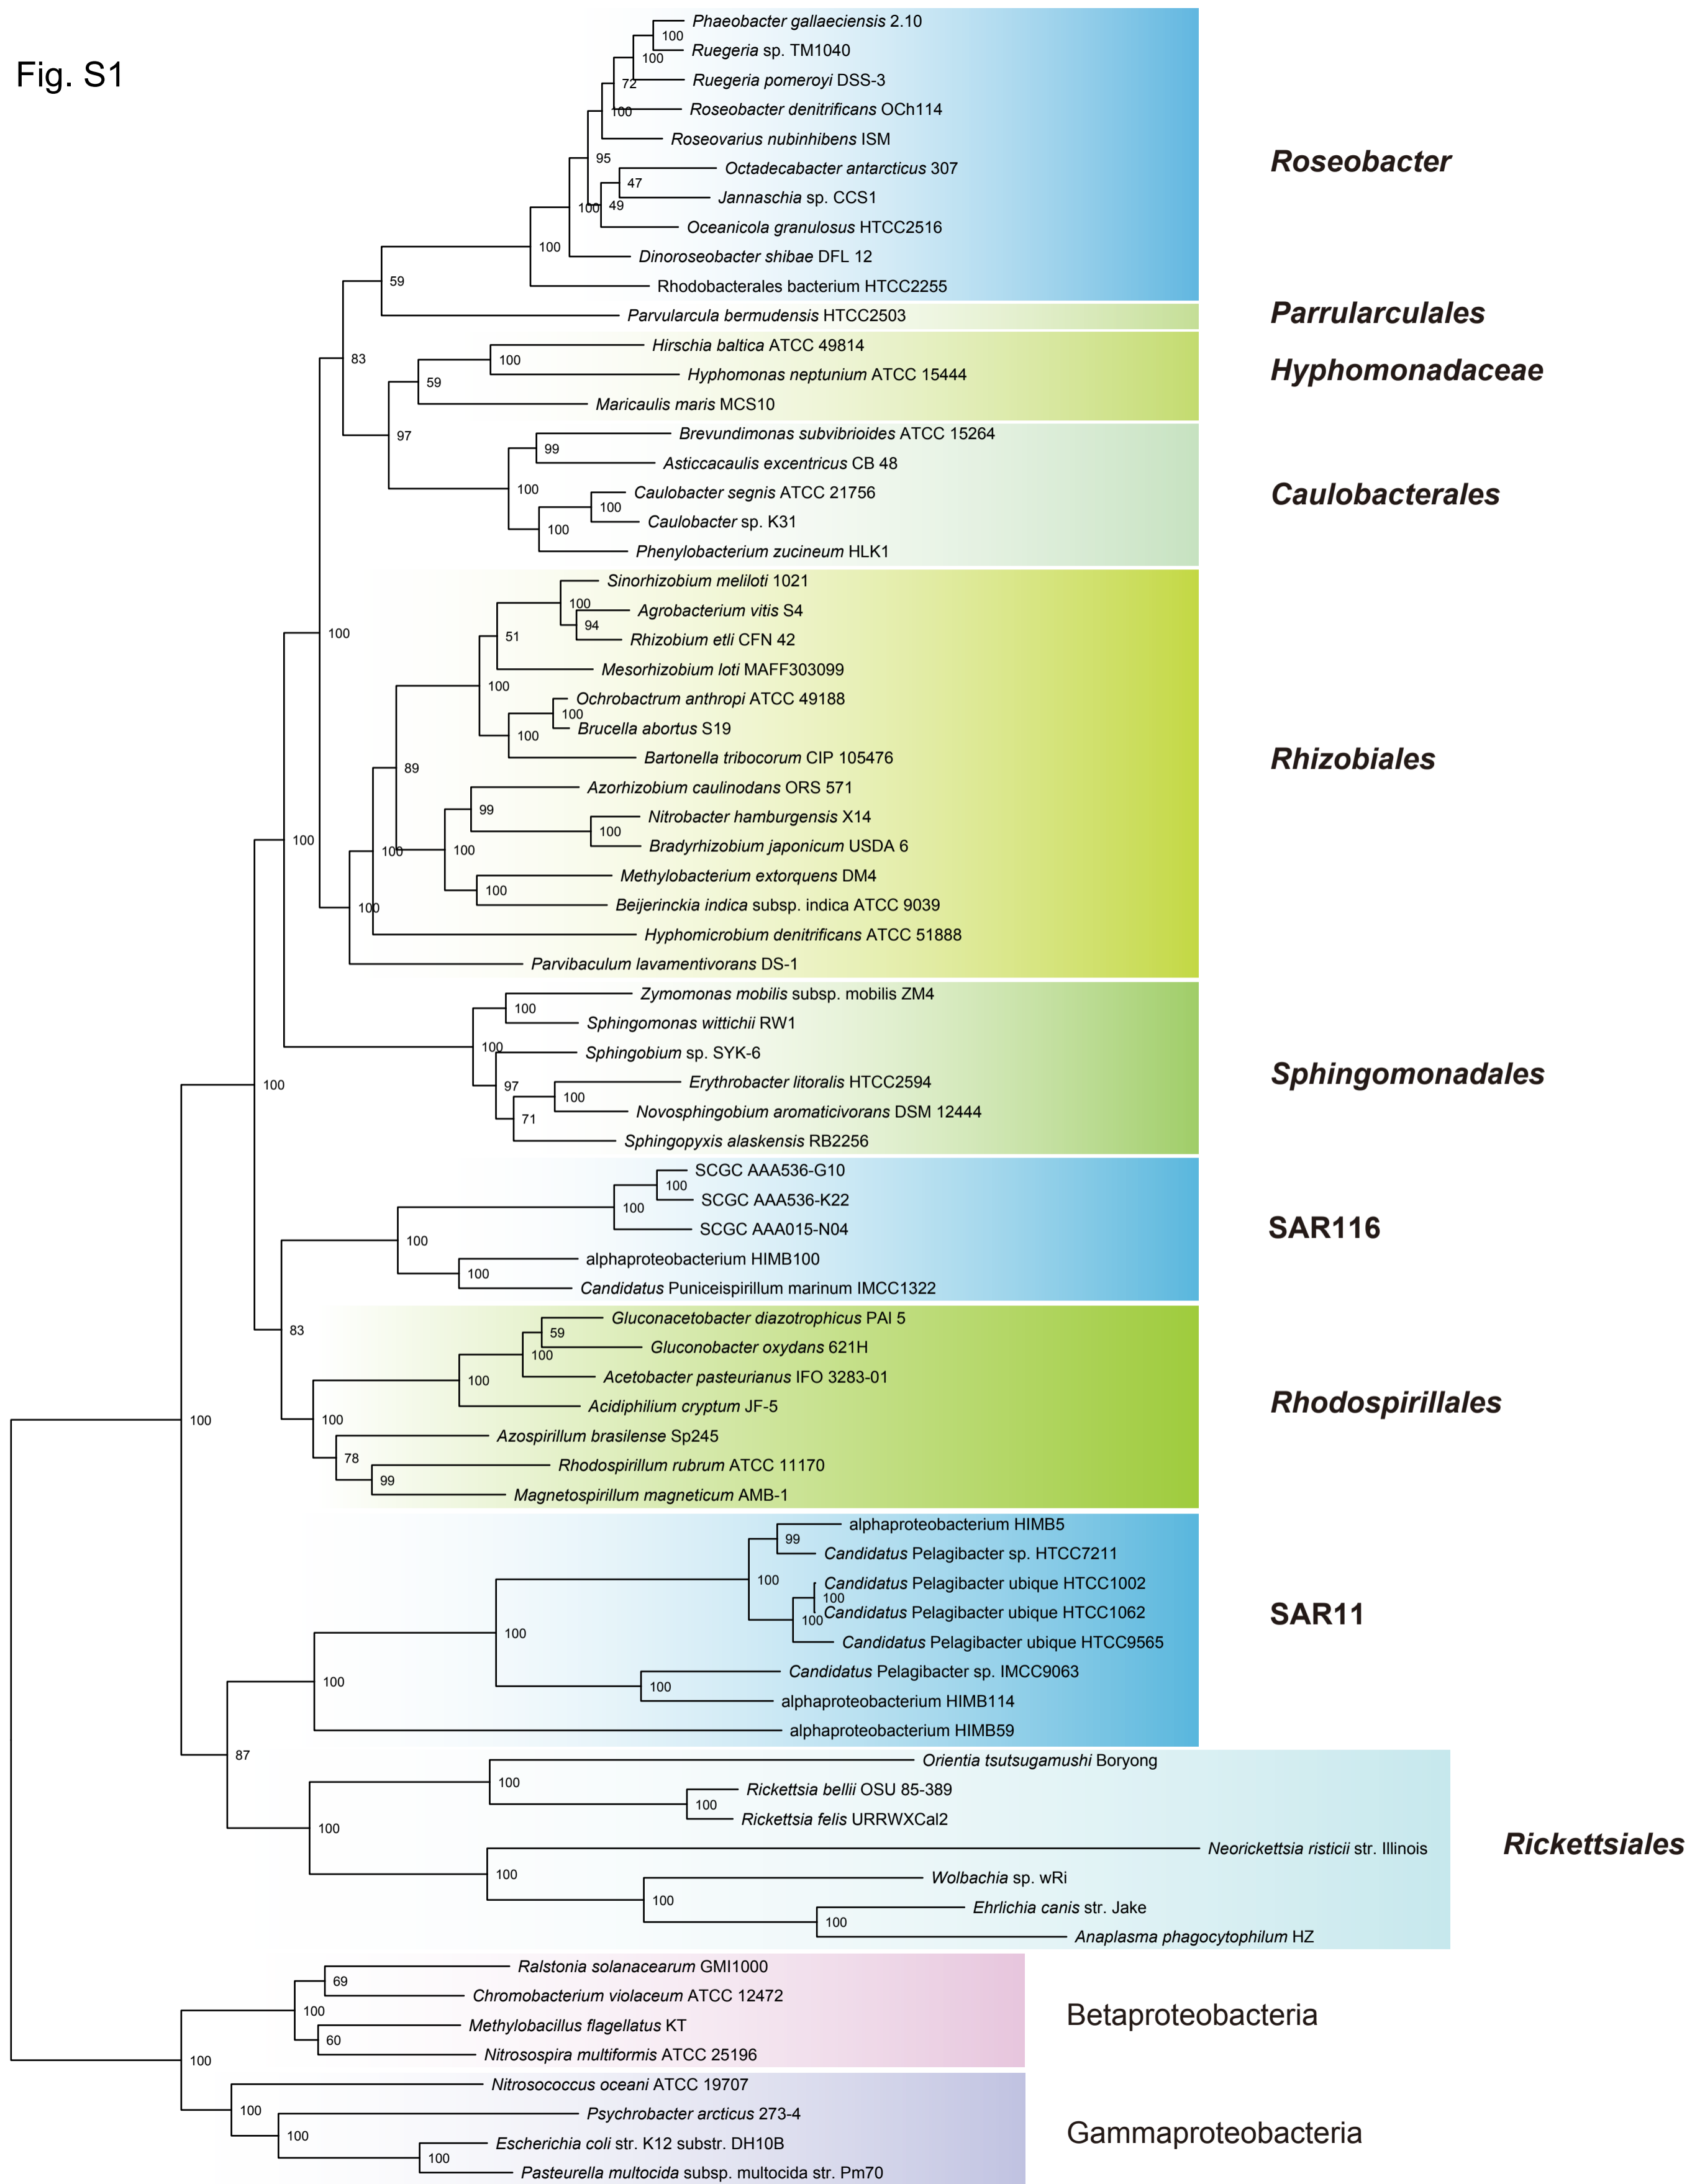

Supplement: ismej2014227x2.pdf [file ismej2014227x2.pdf]

Fig. S2

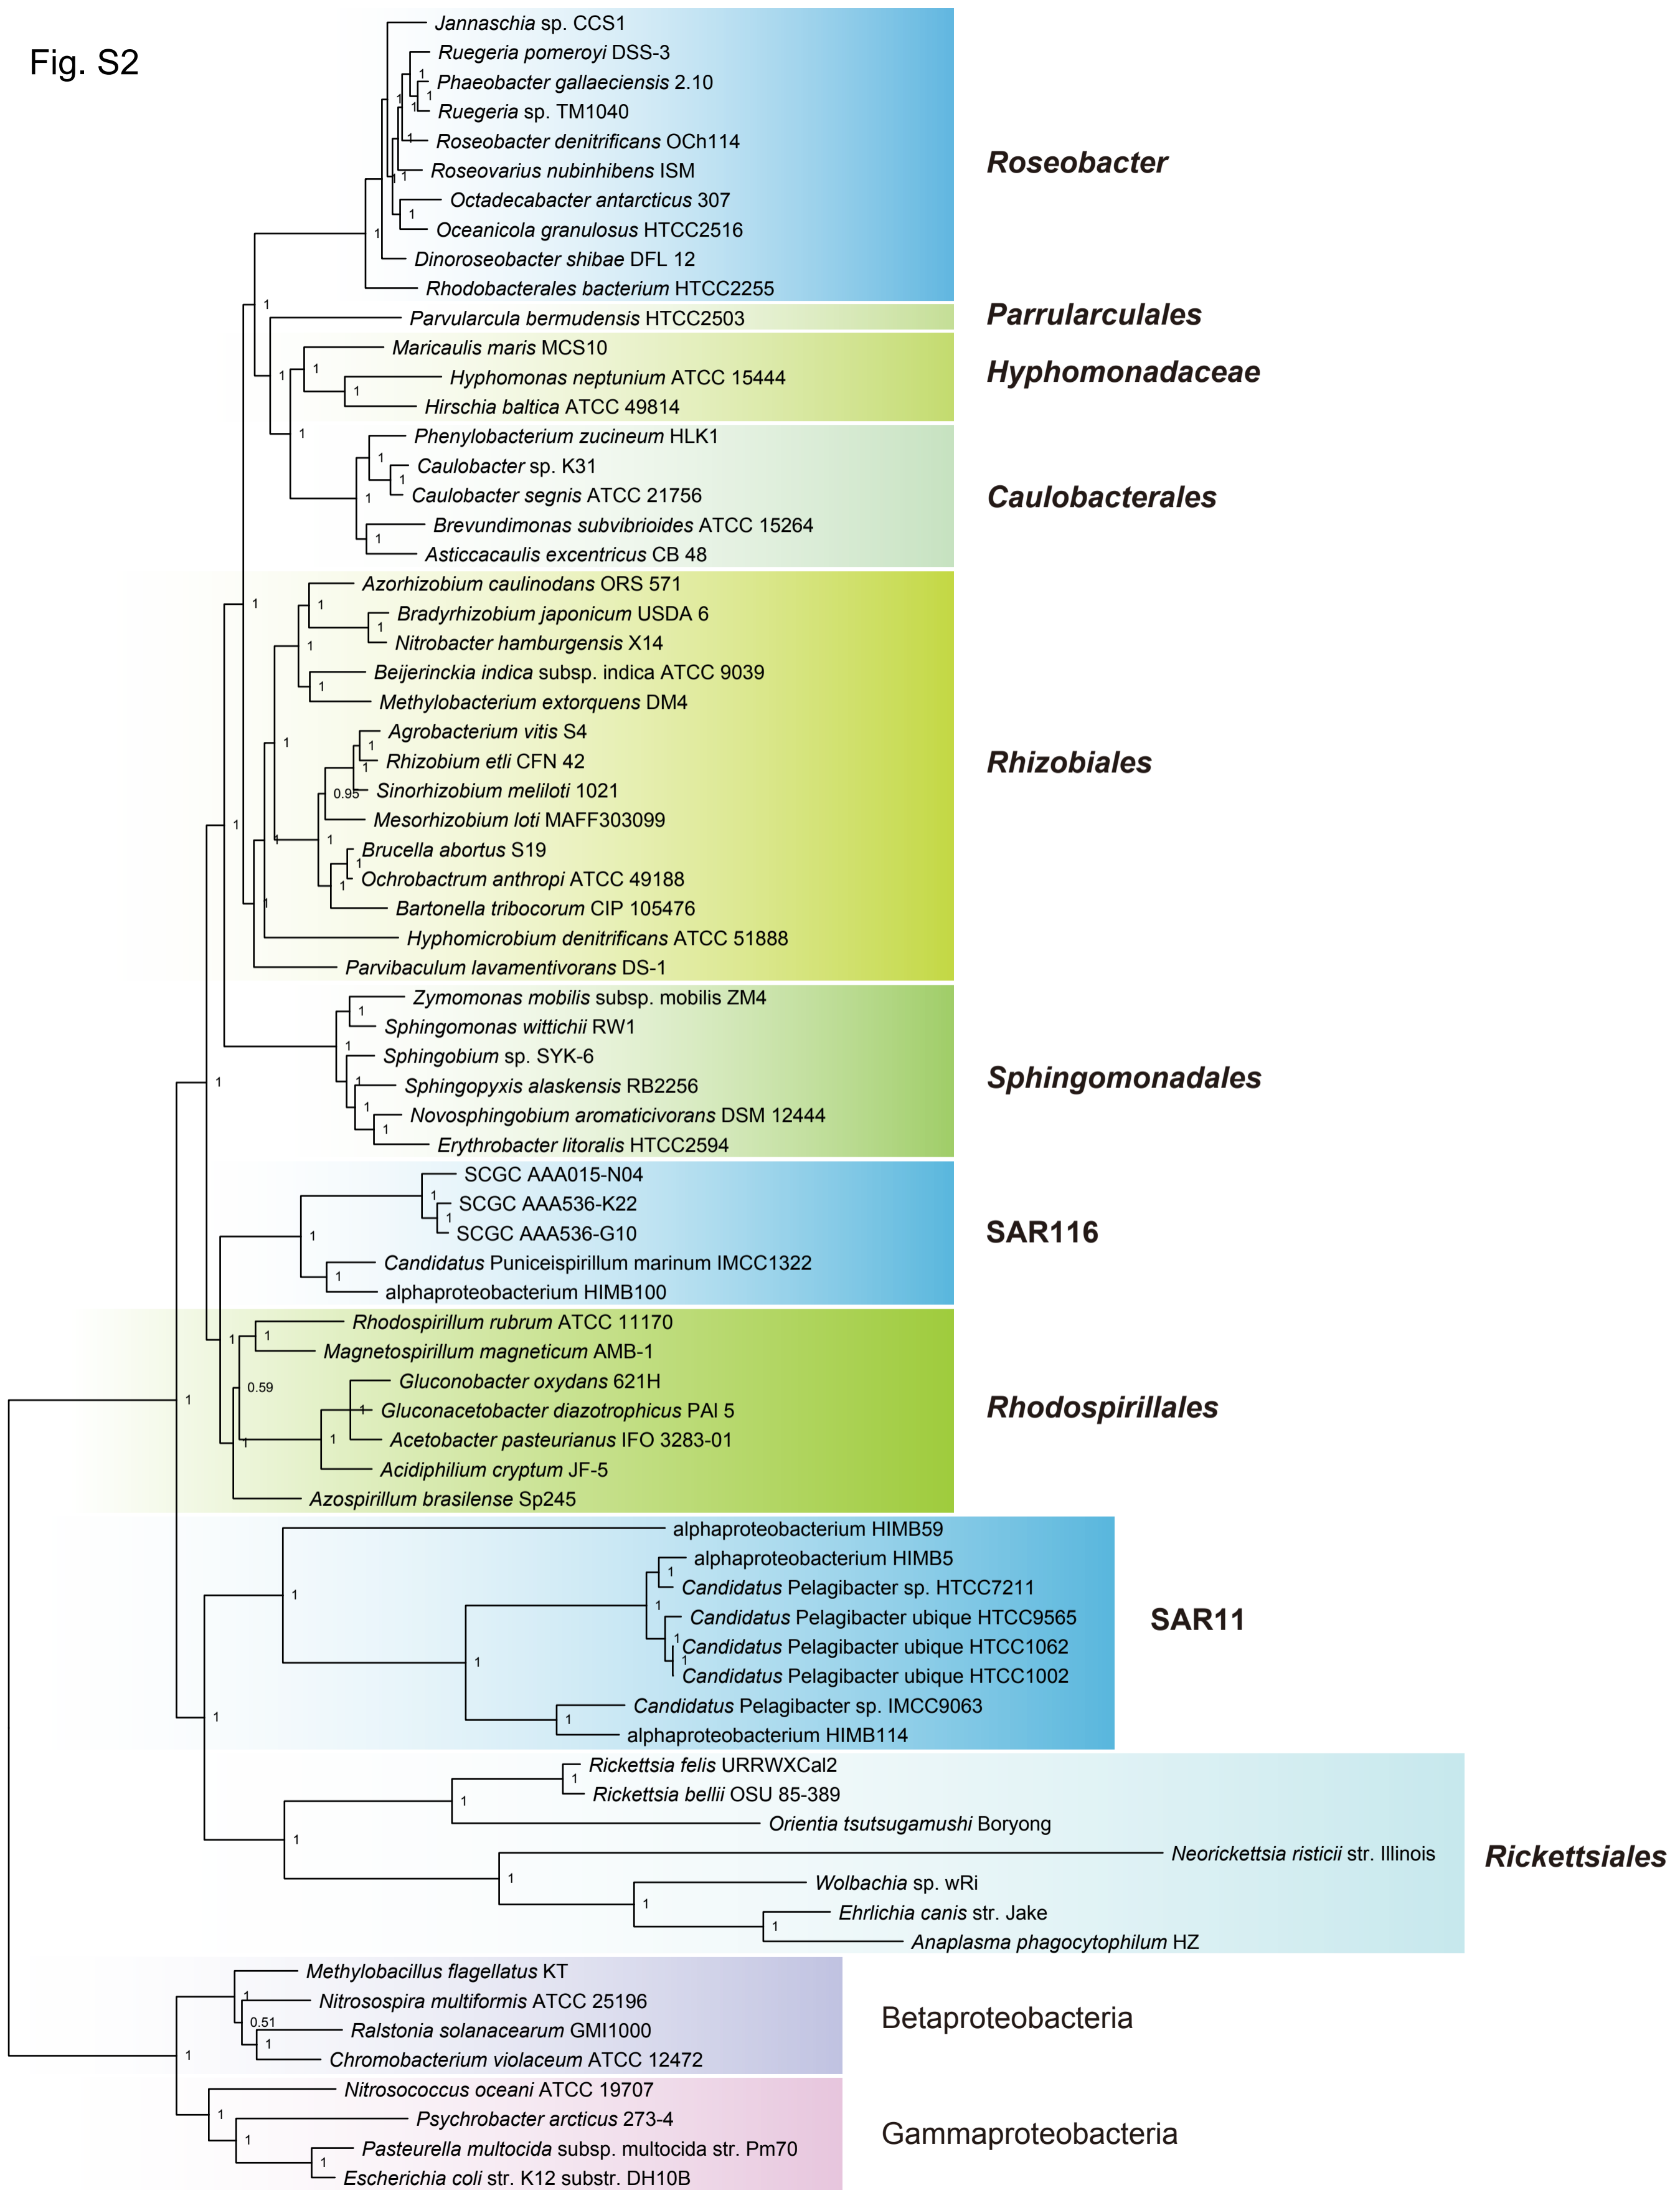

Supplement: ismej2014227x3.pdf [file ismej2014227x3.pdf]

Fig. S3

A

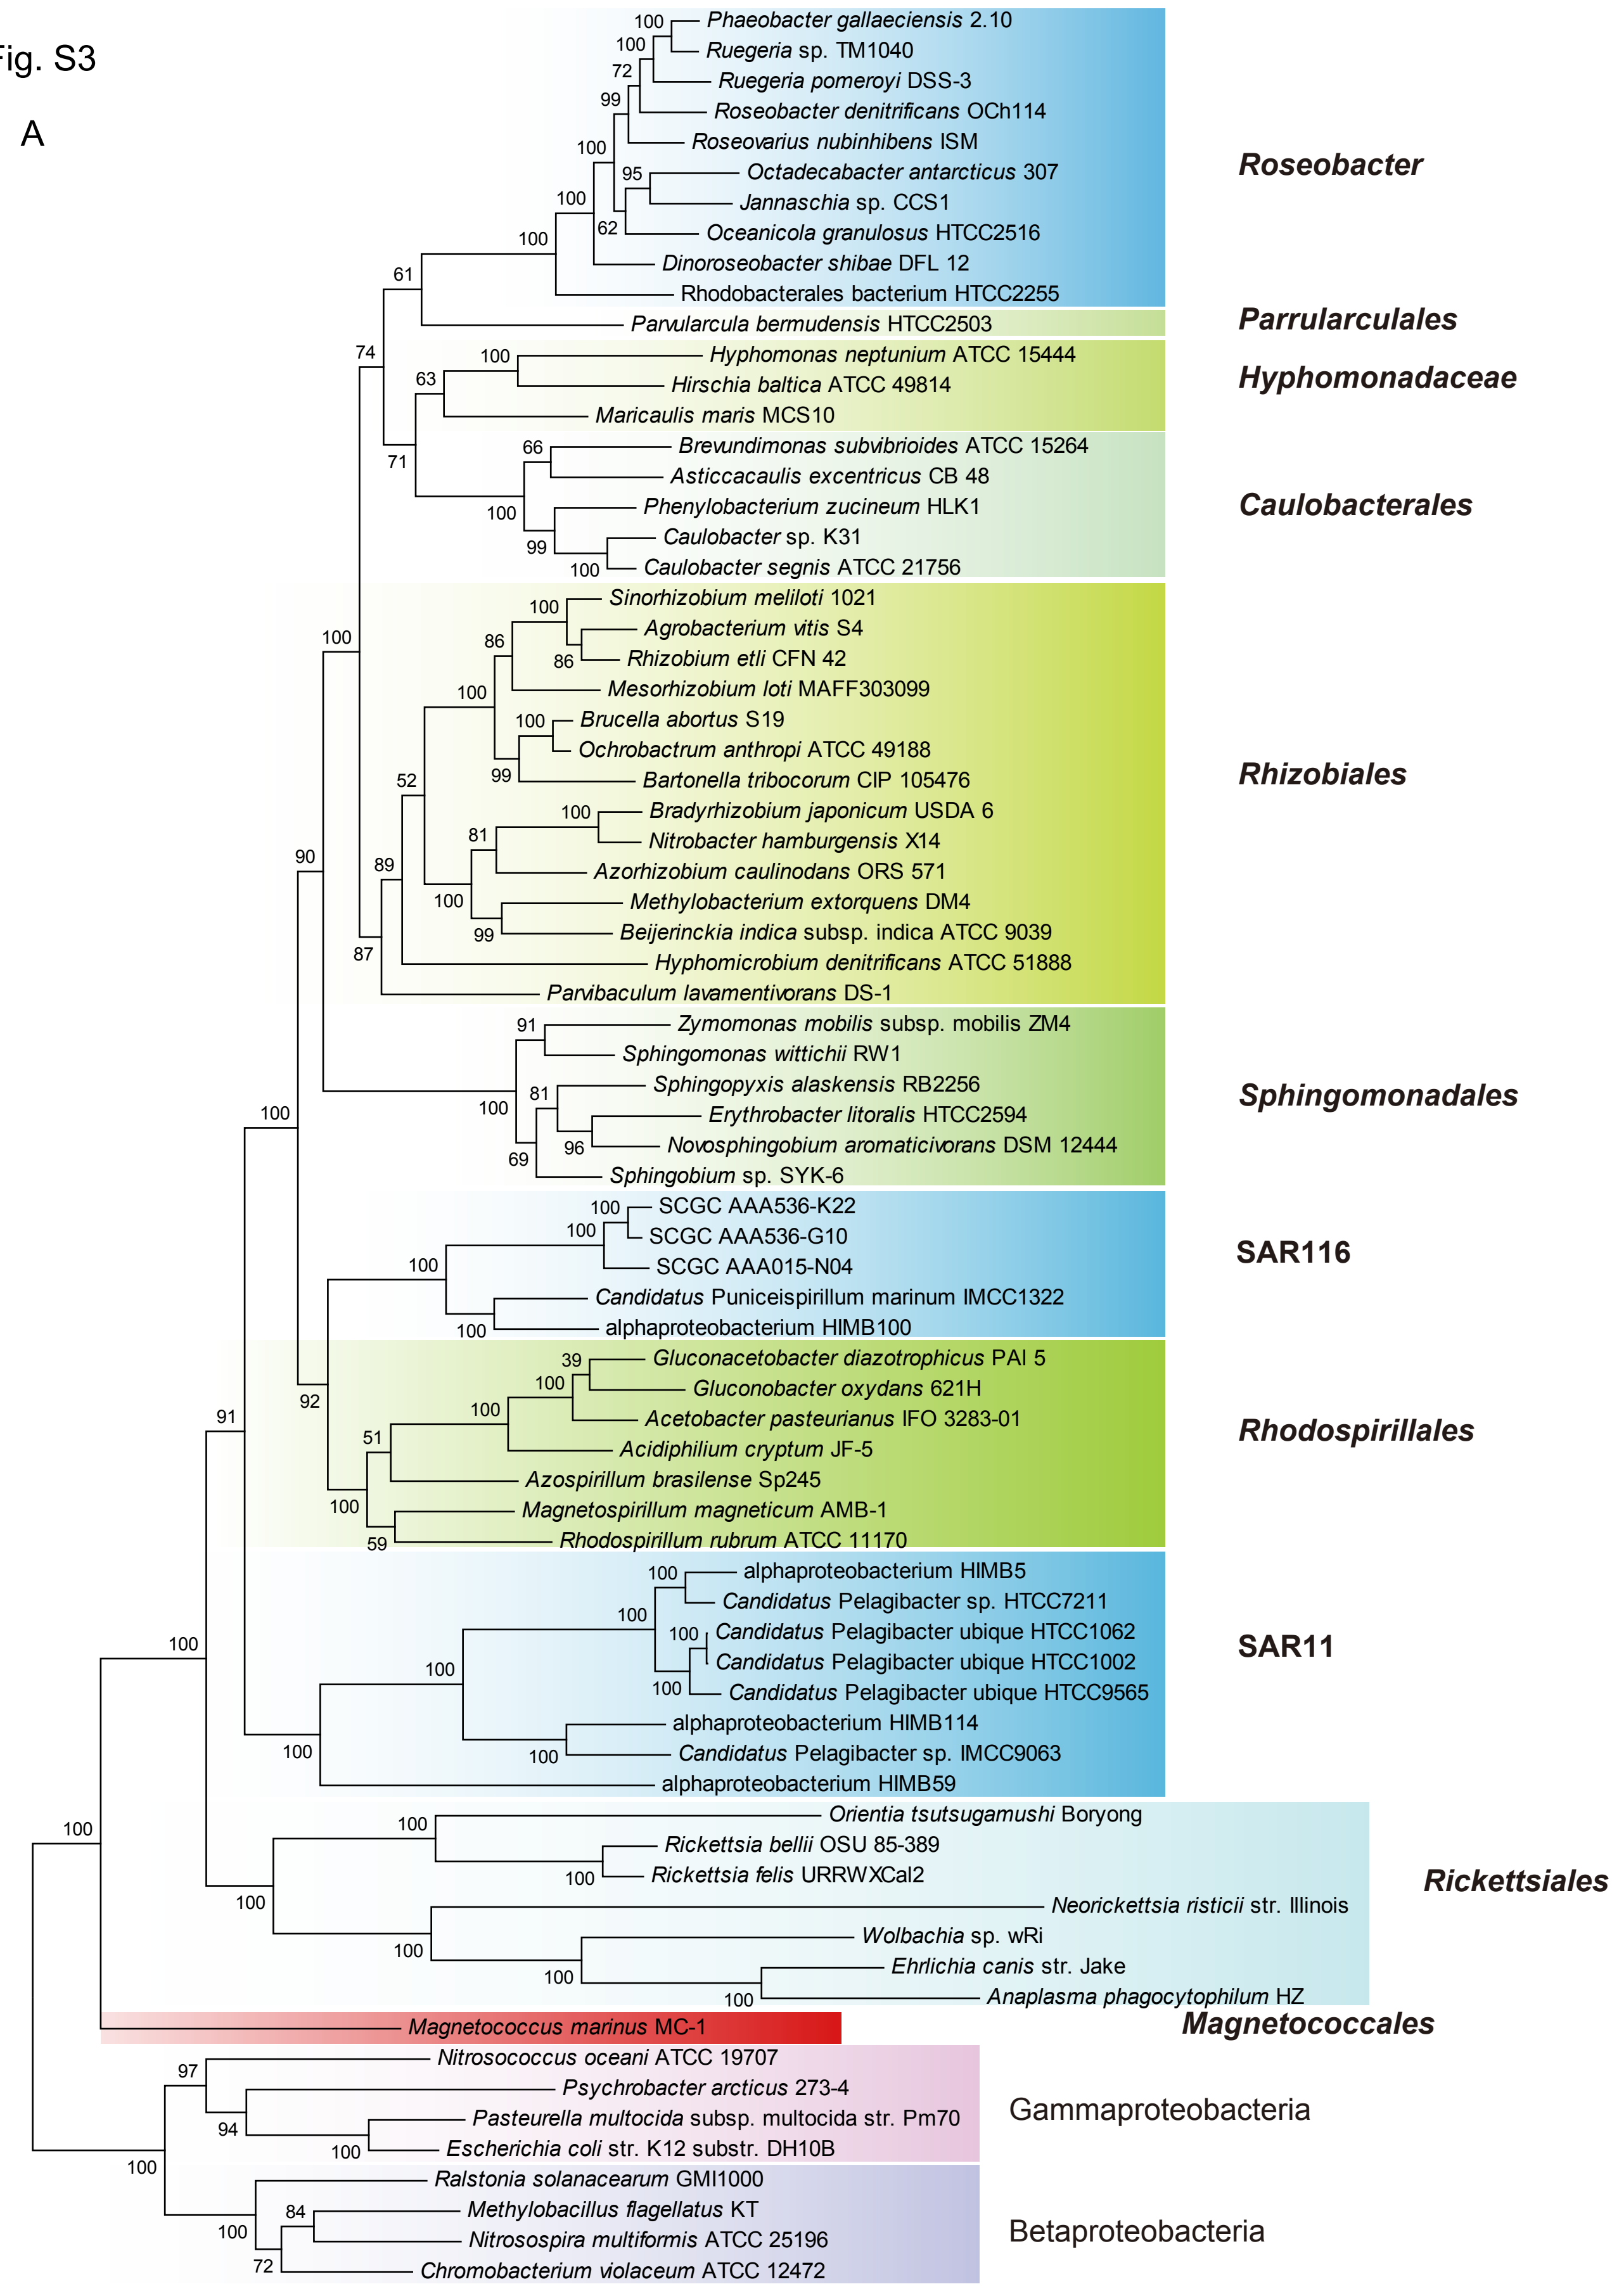

B

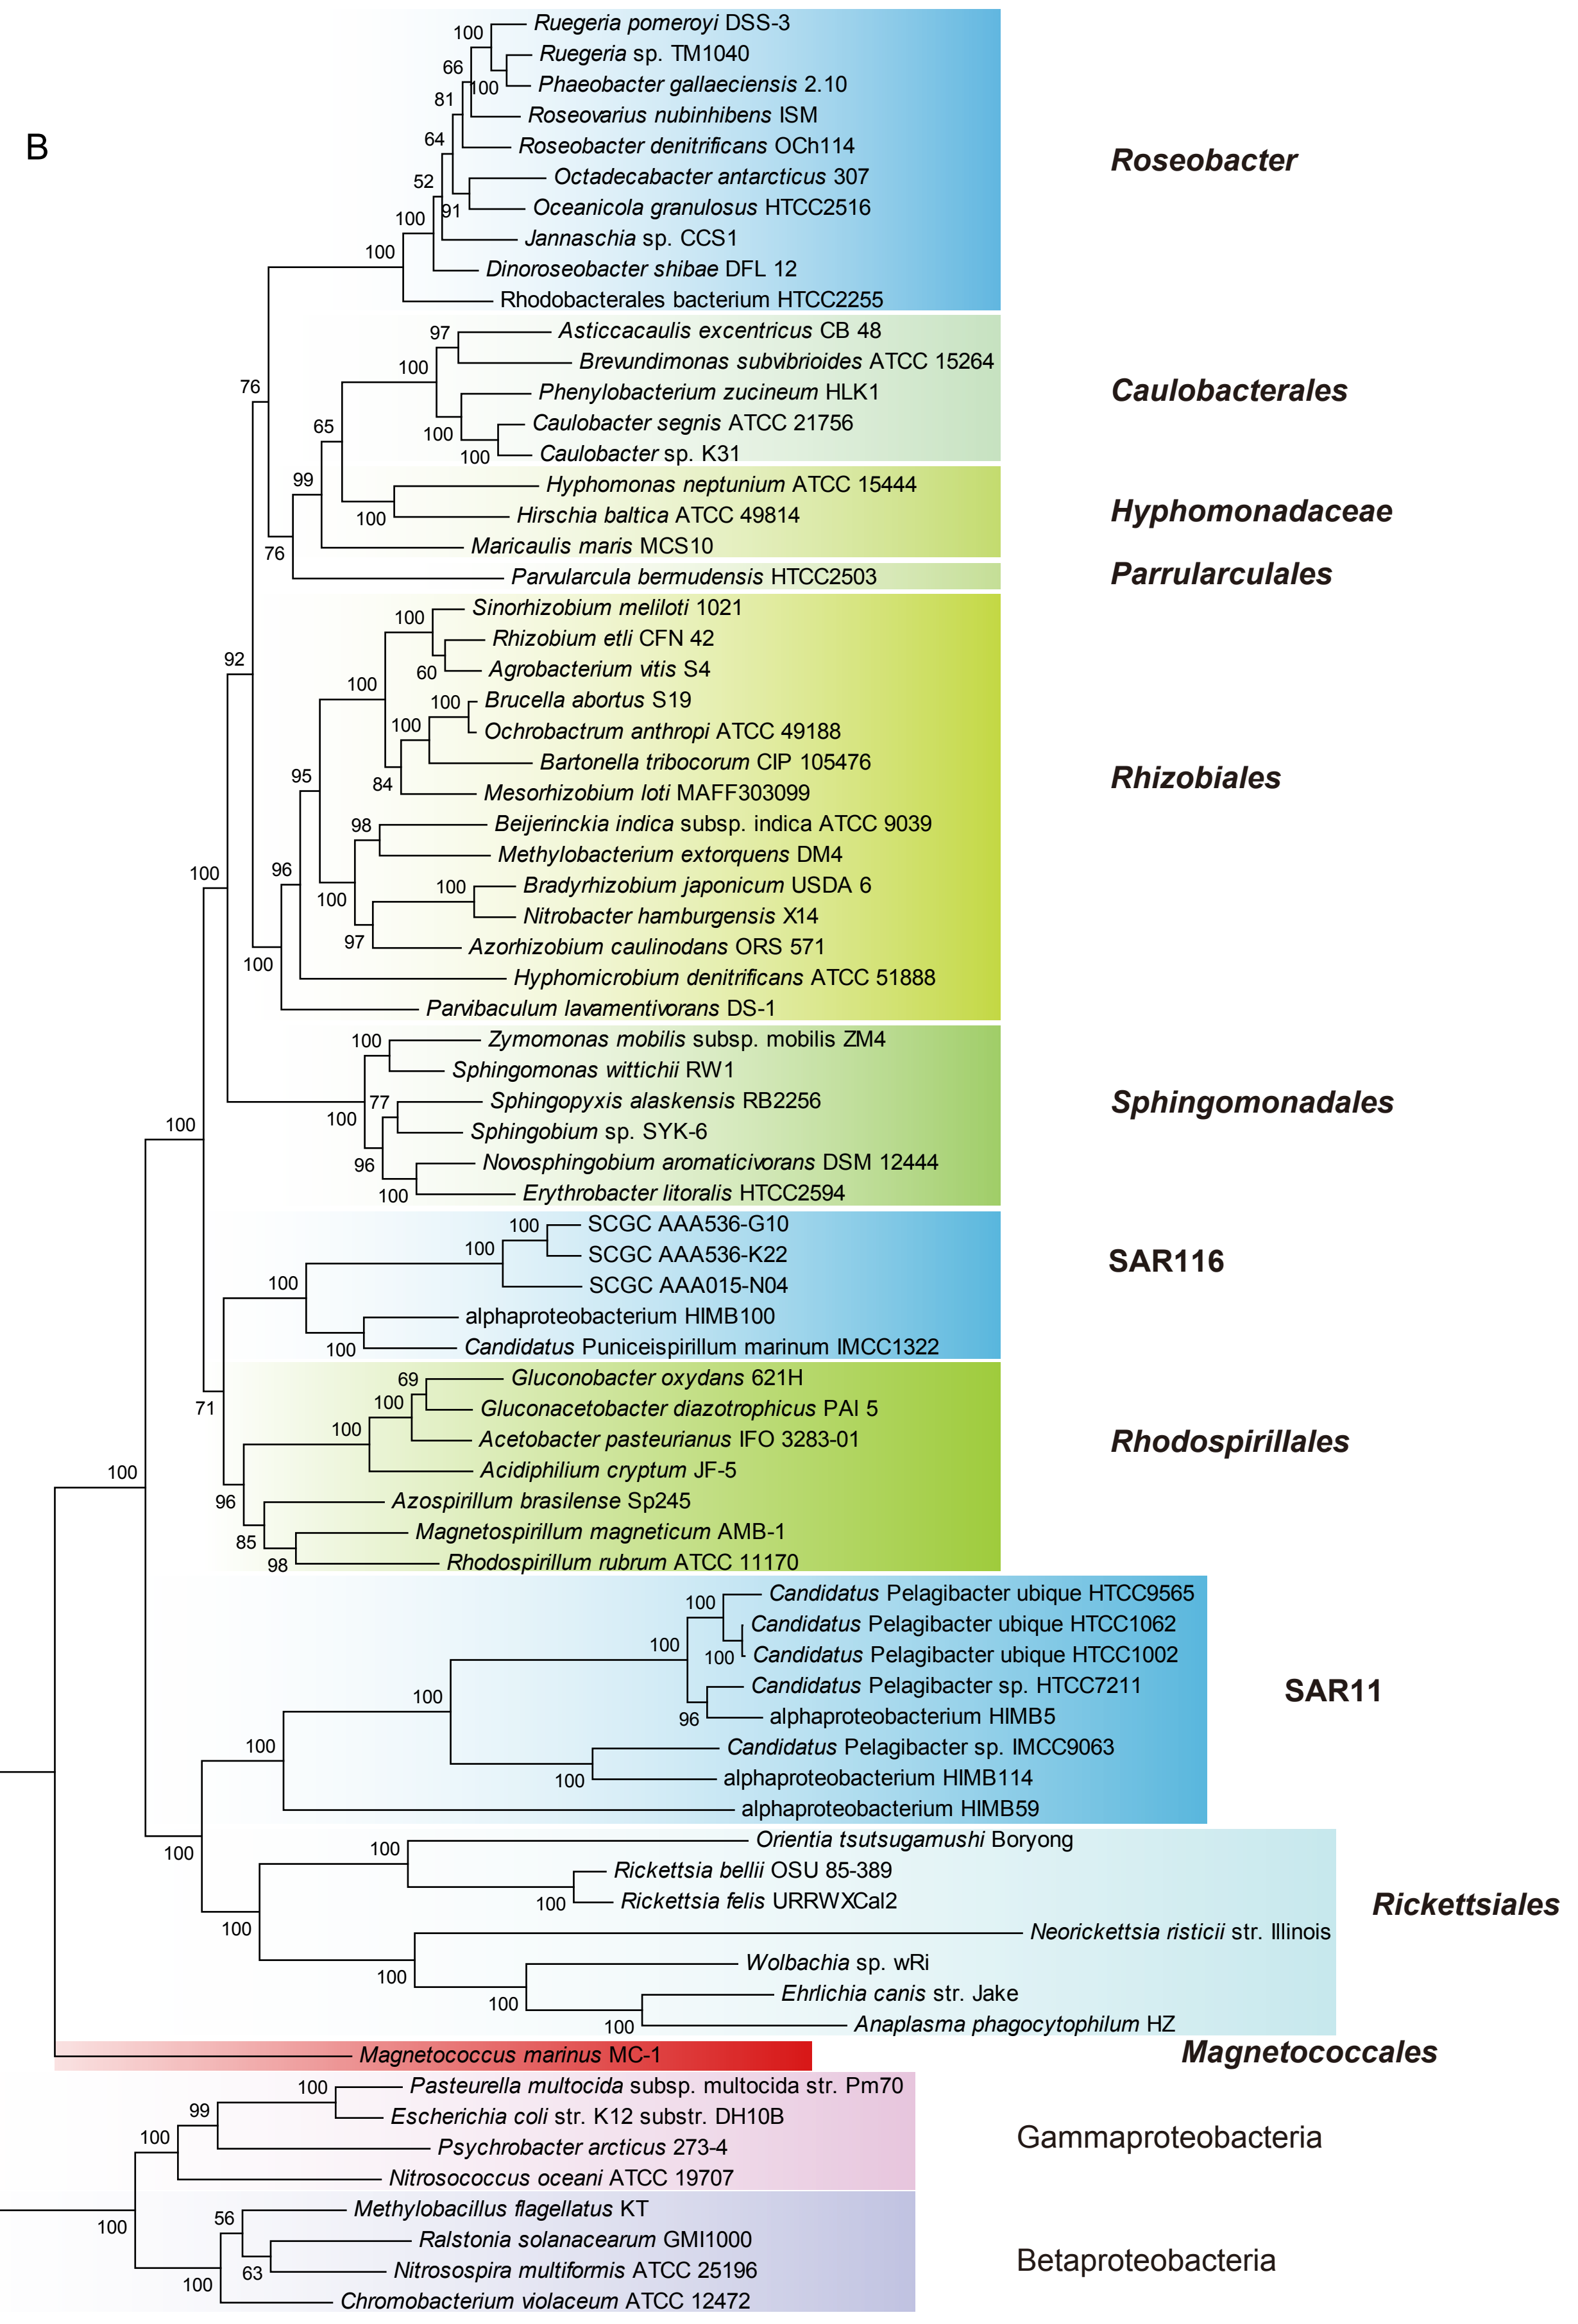

Supplement: ismej2014227x4.pdf [file ismej2014227x4.pdf]
